# Supplementary material for: Cobalt‐Catalyzed Aqueous Dehydrogenation of Formic Acid
Source: PubMed Central journal article supplement — Chemistry. 2019 May 10;25(36):8459–64. doi: 10.1002/chem.201805612 (PMC6618042; doi:10.1002/chem.201805612), 2019-05-10
Supplement: CHEM-25-8459-s001.pdf [file CHEM-25-8459-s001.pdf]

# CHEMISTRY

## A **European** Journal

### Supporting Information

#### **Cobalt-Catalyzed Aqueous Dehydrogenation of Formic Acid**

Wei Zhou, Zhihong Wei, Anke Spannenberg, Haijun Jiao, Kathrin Junge, Henrik Junge, and Matthias Beller\*<sup>[a]</sup>

chem\_201805612\_sm\_miscellaneous\_information.pdf

# **Cobalt Catalyzed Aqueous Dehydrogenation of Formic Acid**

Wei Zhou, Zhihong Wei, Anke Spannenberg, Haijun Jiao, Kathrin Junge, Henrik Junge and  
Matthias Beller\*

Leibniz-Institut für Katalyse an der Universität Rostock  
Albert-Einstein-Straße 29a, 18059 Rostock (Germany)

## **Supporting information**

### **Table of contents**

|                                                                                   |           |
|-----------------------------------------------------------------------------------|-----------|
| <b>1. General information</b>                                                     | <b>1</b>  |
| <b>2. Preparation and Characterization of Cobalt complexes</b>                    | <b>4</b>  |
| <b>3. General procedure for dehydrogenation of formic acid</b>                    | <b>13</b> |
| <b>4. Summary of tested dehydrogenation of formic acid using Co(II) complexes</b> | <b>16</b> |
| <b>5. Long term experiments</b>                                                   | <b>16</b> |
| <b>6. KIE experiments</b>                                                         | <b>17</b> |
| <b>7. Additional experiment regarding mechanistic study</b>                       | <b>19</b> |
| <b>8. Computational Details</b>                                                   | <b>21</b> |
| <b>9. References</b>                                                              | <b>60</b> |

## 1. General information

### 1.1 General experimental details

All reactions were performed under Argon atmosphere with exclusion of air using standard Schlenk techniques. Formic acid (FA), N,N-dimethyl-n-octylamine (DMOA) were refluxed and distilled following standard procedures and stored under Argon atmosphere. Heptane, toluene, tetrahydrofuran (THF), ether (Et<sub>2</sub>O), dichloromethane (DCM) and ethanol (EtOH) were dried by passing through a column of anhydrous alumina using a solvent purification system equipment from *Innovative Technology* and stored under Argon atmosphere. Water was degassed overnight by bubbling Argon overnight. Pentane, HCOOK, tBuOK and NaBEt<sub>3</sub>H were purchased from Sigma-Aldrich or Alfa Aesar and used as received. Complexes (<sup>i</sup>PrPNP)CoCl (**1**),<sup>[1,2]</sup> (<sup>Ph</sup>PNP)CoCl<sub>2</sub> (**4**),<sup>[1]</sup> (<sup>i</sup>PrPNP)CoBr<sub>2</sub><sup>[1]</sup> and (<sup>i</sup>PrPNP)Mn(CO)<sub>2</sub>Br (**7**)<sup>[3]</sup> were prepared according to reported procedures.

<sup>1</sup>H NMR spectra were obtained at 300 MHz (Bruker AV-300) or 400 MHz (Bruker AV-400). <sup>13</sup>C{<sup>1</sup>H} NMR spectra were obtained at 75 MHz or 101 MHz. <sup>31</sup>P{<sup>1</sup>H} NMR spectra were obtained at 121 MHz or 162 MHz. NMR chemical shifts are reported in ppm downfield from tetramethylsilane and were referenced to the residual proton resonance and the natural abundance <sup>13</sup>C resonance of the solvents. <sup>31</sup>P NMR chemical shifts are reported in ppm downfield from H<sub>3</sub>PO<sub>4</sub> and referenced to an external 85% solution of phosphoric acid. Abbreviations used in the reported NMR experiments: br, broad; s, singlet; d, doublet; t, triplet; q, quartet; m, multiplet. Solution magnetic moments were determined by the method of Evans at 25 °C using a ferrocene standard.

Diffraction data were collected on a Bruker Kappa APEX II Duo diffractometer. The structures were solved by direct methods (SHELXS-97: Sheldrick, G. M. *Acta Cryst.* **2008**, A64, 112.) and refined by full-matrix least-squares procedures on *F*<sup>2</sup> (SHELXL-2014: Sheldrick, G. M. *Acta Cryst.* **2015**, C71, 3.). XP (Bruker AXS) was used for graphical representations.

### 1.2 Calculation of TON

The measured gas volumes were corrected by a blank value (volume increase measured in a reaction performed under same conditions but without catalyst).

The turnover number (TON) was calculated by equation **S1**:

$$TON = \frac{V_{obs} - V_{blank}}{(V_{m,H_2,25^\circ C} + V_{m,CO_2,25^\circ C}) n_{cat}} \quad (\mathbf{S1})$$

where *V*<sub>obs</sub> and *V*<sub>blank</sub> are the gas volume measured in the catalytic reaction and blank reaction, respectively.

The calculation of *V*<sub>*m,H*<sub>2</sub>,25°C</sub> was carried out using Van der Waals equation (equation **S2**):

$$V_{m,H_2,25^\circ C} = \frac{RT}{p} + b - \frac{a}{RT} = 24.48 \frac{L}{mol} \quad (\mathbf{S2})$$

Where:

- R:  $8.3145 \text{ m}^3 \cdot \text{Pa} \cdot \text{mol}^{-1} \cdot \text{K}^{-1}$ ;
- T: 298.15 K;
- P: 101325 Pa;
- a:  $24.7 \cdot 10^{-3} \cdot \text{Pa} \cdot \text{m}^6 \cdot \text{mol}^{-2}$ ;
- b:  $26.6 \cdot 10^{-6} \text{ m}^3 \cdot \text{mol}^{-1}$

The calculation of  $V_{m,CO_2,25^\circ C}$  was carried out using Van der Waals equation (equation **S3**):

$$V_{m,CO_2,25^\circ C} = \frac{RT}{p} + b - \frac{a}{RT} = 24.36 \frac{L}{mol} \quad (\text{S3})$$

Where:

- R:  $8.3145 \text{ m}^3 \cdot \text{Pa} \cdot \text{mol}^{-1} \cdot \text{K}^{-1}$ ;
- T: 298.15 K;
- P: 101325 Pa;
- a:  $36.5 \cdot 10^{-2} \cdot \text{Pa} \cdot \text{m}^6 \cdot \text{mol}^{-2}$ ;
- b:  $42.7 \cdot 10^{-6} \text{ m}^3 \cdot \text{mol}^{-1}$

### 1.3 GC calibrations

The gas constitution was determined by gas-phase GC. A GC sample was taken from the reaction system and was analyzed by one of the two available systems:

GC a): HP Plot Q / FID – hydrocarbons, Carboxen / TCD - permanent gases, He carrier gas.

GC b): Carboxen / TCD / Methanizer / FID - permanent gases, He carrier gas.

The gas integration was calibrated using certified gas mixtures from commercial suppliers (Linde and Air Liquide) with the following gas vol%:

GC a):

H<sub>2</sub>: 0.25%, 0.5%, 1%, 10%, 25%, 50%, 100%

CO: 10 ppm, 100 ppm, 250 ppm, 1000 ppm, 1%, 10%

CO<sub>2</sub>: 1%, 5%, 10%, 25%, 50%, 100%

CH<sub>4</sub>: 1%, 5%, 10%

GC b):

H<sub>2</sub>: 0.25%, 0.5%, 1%, 10%, 25%, 50%, 100%

CO: 1 ppm, 10 ppm, 75 ppm, 100 ppm, 250 ppm, 1000 ppm, 1%, 10%

CO<sub>2</sub>: 1%, 5%, 10%, 25%, 50%, 100%

CH<sub>4</sub>: 1%, 5%, 10%

The systems allow for the determination of H<sub>2</sub>, Ar, CH<sub>4</sub>, CO and CO<sub>2</sub> within the ranges:

H<sub>2</sub> ≥ 0.25 vol% - 100 vol%

CO ≥ 10 ppm [GC a)], CO down to 1 ppm [GC b)]

CO<sub>2</sub> ≥ 100 ppm - 100 vol% [GC a)], down to 1 ppm [GC b)]

CH<sub>4</sub> ≥ 1 ppm [GC b)]

GC analysis provides volume percentage of the different components of the collected gas: H<sub>2</sub>, CO<sub>2</sub>, CO, and CH<sub>4</sub>.

## 2. Preparation and Characterization of Cobalt complexes

### 2.1 Preparation of Co(I) complex 2

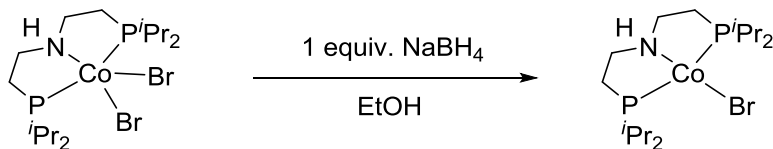

(<sup>*i*</sup>PrPNP)CoBr<sub>2</sub> (182.1 mg, 0.347 mmol) and NaBH<sub>4</sub> (13.2 mg, 0.347 mmol) were placed in a 20 mL Schlenk tube and 10 mL of EtOH was added. The purple suspension turned to brown immediately and formed a green solution within few minutes, the system stirred at room temperature for 2h during which time the solution turned to dark blue. The solvent was removed under vacuum and the solid residue was extracted with toluene (5 mL × 3). The toluene solution was concentrated to 4 mL, and 10 mL of heptane was added under vigorous stirring to yield the blue product. The solvent was removed via syringe and the product was washed with heptane (5 mL × 3), and dried under vacuum. Yield: 100.1 mg, 65%.

Crystals suitable for X-ray analysis were grown from a concentrated solution of toluene cooled to -32 °C  
<sup>1</sup>H NMR (300 MHz, Benzene-*d*<sub>6</sub>) δ 63.48 (br), 28.29 (br), 20.86 (br), 19.30 (br), 10.93 (br), -0.42 (br), -1.06 (br), -15.97 (br).

Anal. Calc: C, 43.26; H, 8.40; N, 3.15. Observed: C, 43.22; H, 8.58; N, 3.03; μ<sub>eff</sub> = 3.09 μ<sub>B</sub>

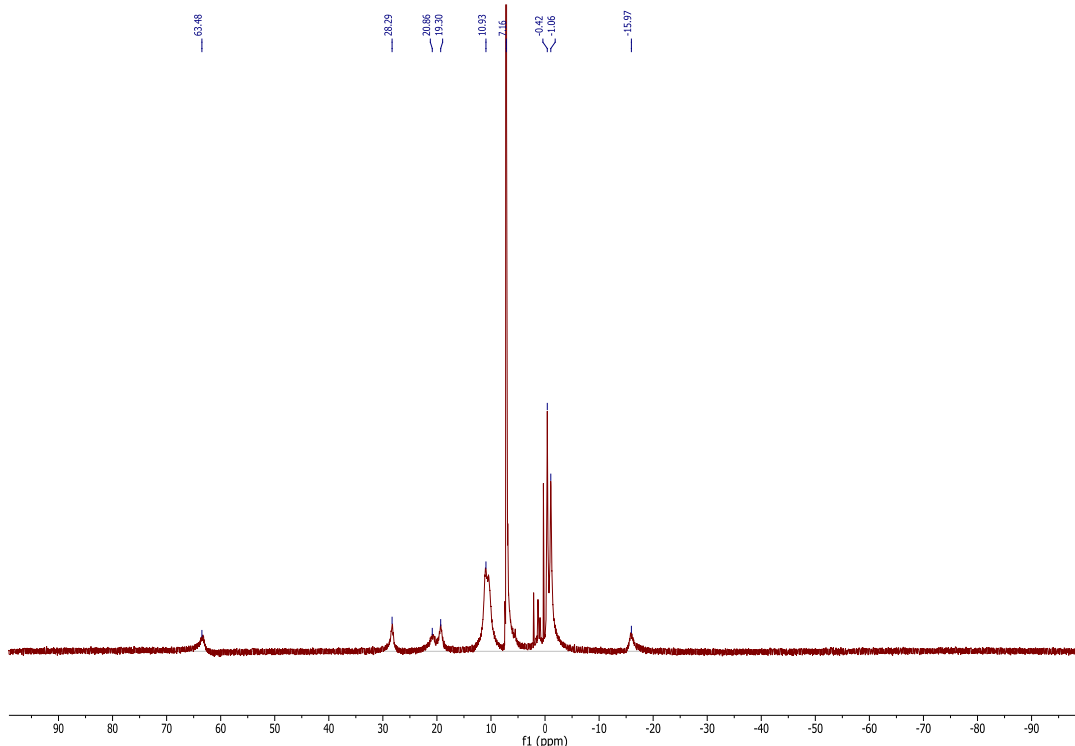

Figure S1 <sup>1</sup>H NMR (C<sub>6</sub>D<sub>6</sub>) spectrum of complex 2

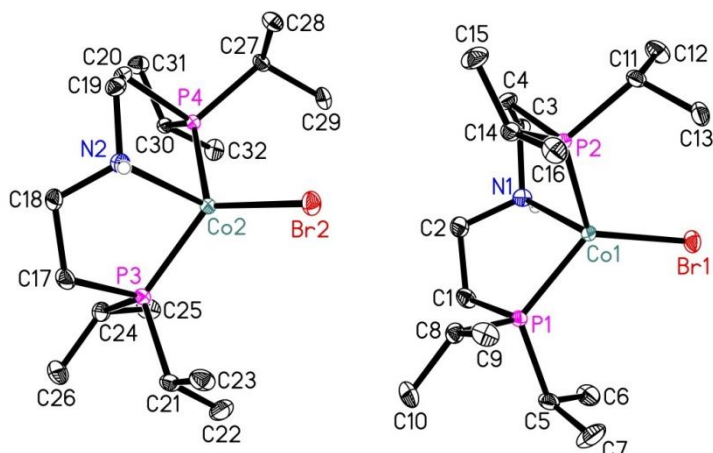

**Figure S2** Molecular structure of complex **2** with thermal ellipsoids at 30% probability. All hydrogens except that attached to nitrogen were eliminated for clarity.

**Table S1.** Selected bond lengths and angles of complex **2**:

| Bond distances [Å] |            |         |            | Bond Angles [°] |             |            |             |
|--------------------|------------|---------|------------|-----------------|-------------|------------|-------------|
| Br1-Co1            | 2.3789(3)  | Br2-Co2 | 2.3866(3)  | N1-Co1-P2       | 86.39(5)    | N2-Co2-P3  | 86.16(4)    |
| Co1-N1             | 2.1479(16) | Co2-N2  | 2.1473(15) | N1-Co1-P1       | 86.44(4)    | N2-Co2-P4  | 86.29(5)    |
| Co1-P1             | 2.2408(5)  | Co2-P3  | 2.2424(5)  | P2-Co1-P1       | 114.747(19) | P3-Co2-P4  | 116.16(2)   |
| Co1-P2             | 2.2395(5)  | Co2-P4  | 2.2496(5)  | N1-Co1-Br1      | 108.48(5)   | N2-Co2-Br2 | 109.34(5)   |
|                    |            |         |            | P1-Co1-Br1      | 123.752(16) | P3-Co2-Br2 | 125.178(17) |
|                    |            |         |            | P2-Co1-Br1      | 119.947(16) | P4-Co2-Br2 | 17.050(15)  |

## 2.2 Preparation of Co(I) complex **3**

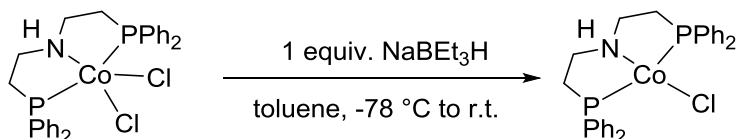

To a suspension of (<sup>Ph</sup>PNP)CoCl<sub>2</sub> (571.3 mg, 1 mmol) in 25 mL toluene NaBEt<sub>3</sub>H (1 mL, 1.0 M in toluene) was added at -78 °C. The system was allowed to warm up to r.t. gradually and stirred overnight. The resulting solution was filtered through Celite and concentrated to 5 mL. Then, pentane (15 mL) was added to the solution under stirring to give a green precipitate. The solid product was filtered, washed with pentane and dried under vacuum. Yield: 439.6 mg, 82%.

Crystals suitable for X-ray analysis were grown by layering a benzene solution with pentane.

<sup>1</sup>H NMR (300 MHz, Benzene-*d*<sub>6</sub>) δ 15.95 (br), 13.36 (br), 7.99 (br), 7.15 – 6.25 (m), 5.05 (br), 4.37 (br), 4.08 (br), 2.86 – 0.62 (m), -1.05 (br).

Anal. Calc: C, 62.76; H, 5.45; N, 2.61. Observed: C, 62.65; H, 5.74; N, 2.20;  $\mu_{\text{eff}} = 2.57 \mu_{\text{B}}$

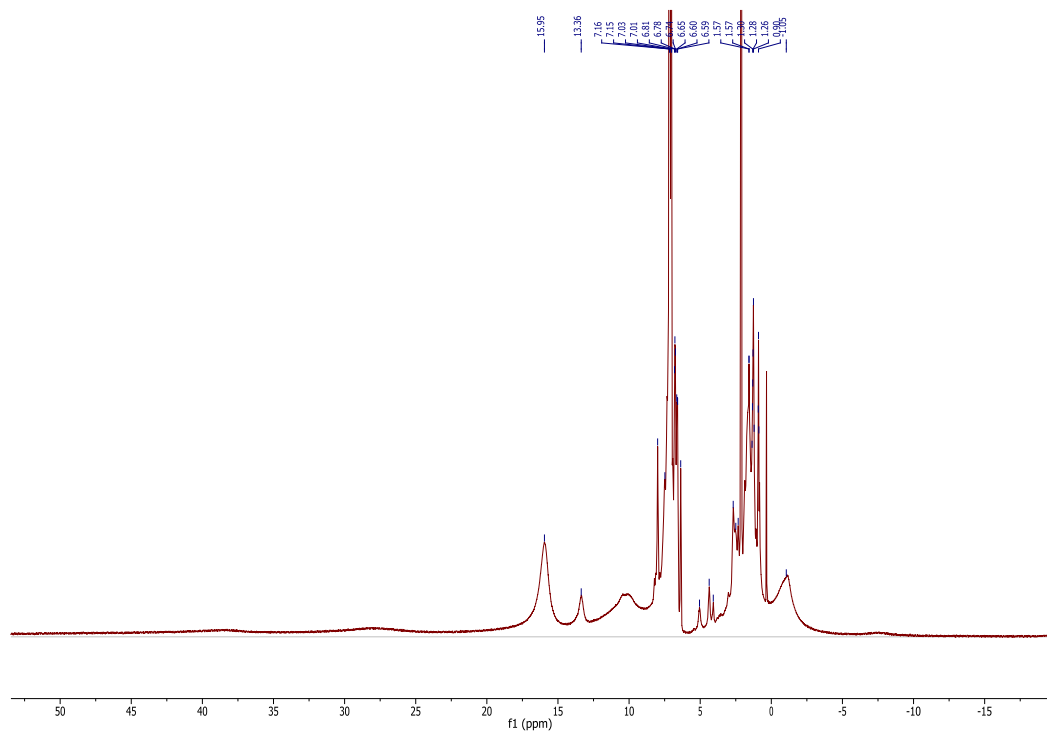

**Figure S3**  $^1\text{H}$  NMR ( $\text{C}_6\text{D}_6$ ) spectrum of complex **3**

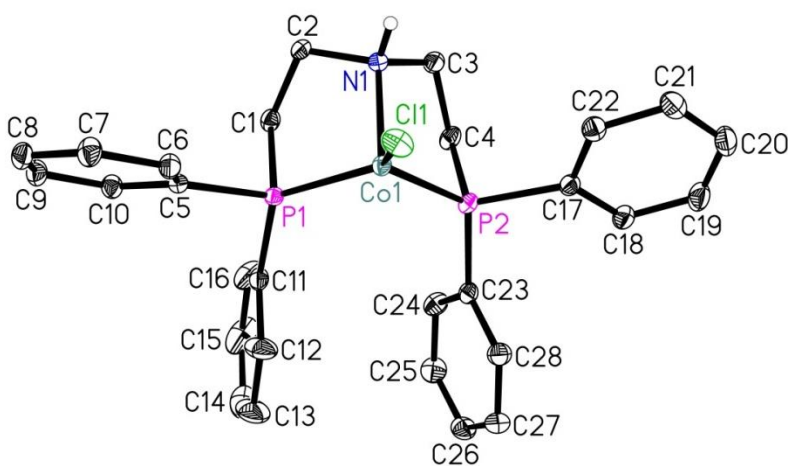

**Figure S4** Molecular structure of complex **3** with thermal ellipsoids at 30% probability. All hydrogens except that attached to nitrogen and co-crystallized solvent (benzene) were eliminated for clarity.

**Table S2.** Selected bond lengths and angles of complex **3**:

| Bond distances [Å] |            | Bond Angles [°] |             |
|--------------------|------------|-----------------|-------------|
| Cl1-Co1            | 2.2240(4)  | N1-Co1-P2       | 86.17(4)    |
| Co1-N1             | 2.1528(13) | N1-Co1-Cl1      | 113.03(4)   |
| Co1-P2             | 2.2094(4)  | P2-Co1-Cl1      | 127.384(17) |
| Co1-P1             | 2.2313(4)  | N1-Co1-P1       | 86.04(4)    |
|                    |            | P2-Co1-P1       | 102.380(15) |
|                    |            | Cl1-Co1-P1      | 126.349(17) |



## 2.3 Preparation of Co(II) complex 5

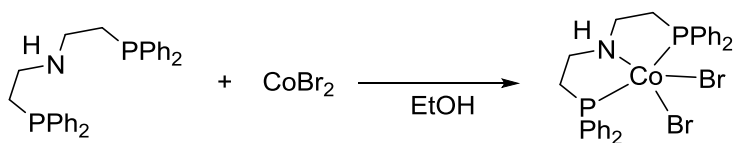

CoBr<sub>2</sub> (109.4 mg, 0.5 mmol) was dissolved in 10 mL EtOH. To this solution the pincer ligand (220.7 mg, 0.5 mmol in 3 mL THF) was added at 60 °C, the color turned from blue to dark purple with precipitate. The system stirred at r.t. overnight and the resultant bluish green solvent was removed via syringe. The product was washed with EtOH (10 mL × 3) and heptane (10 mL × 3), dried under vacuum to give a purple solid. Yield: 284.9 mg, 86%.

Crystals suitable for X-ray analysis were grown by layering a DCM solution with EtOH.

Anal. Calc: C, 50.94; H, 4.43; N, 2.12. Observed: C, 51.02; H, 5.59; N, 1.79.

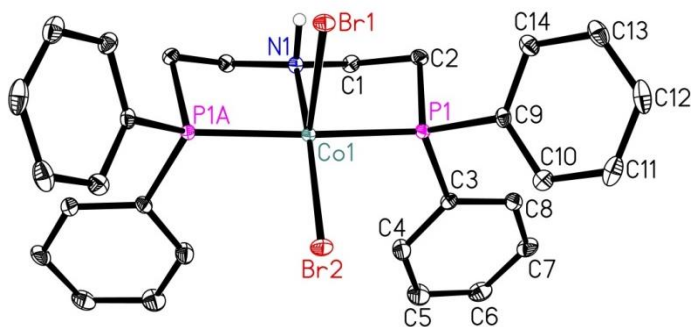

**Figure S5** Molecular structure of complex **5** with thermal ellipsoids at 30% probability. All hydrogens except that attached to nitrogen were eliminated for clarity. Operator for generating equivalent atoms:  $x, -y+1/2, z$

**Table S3.** Selected bond lengths and angles of complex **5**:

| Bond distances [Å] |           | Bond Angles [°] |            |
|--------------------|-----------|-----------------|------------|
| Br1-Co1            | 2.5463(6) | N1-Co1-P1       | 84.44(2)   |
| Br2-Co1            | 2.3754(6) | P1-Co1-P1       | 167.28(4)  |
| Co1-N1             | 2.014(3)  | N1-Co1-Br2      | 165.45(10) |
| Co1-P1             | 2.2082(6) | P1-Co1-Br2      | 94.60(2)   |
|                    |           | N1-Co1-Br1      | 89.37(9)   |
|                    |           | P1-Co1-Br1      | 93.02(2)   |
|                    |           | Br2-Co1-Br1     | 105.18(2)  |

## 2.3 Preparation of Co(I) complex 9

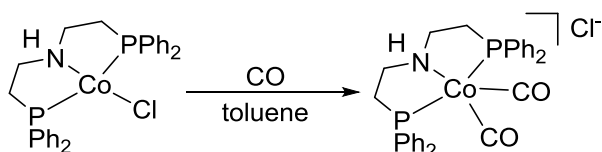

(<sup>Ph</sup>PNP)CoCl (200 mg, 0.37 mmol) was dissolved in 10 mL toluene and the solution was stirred under CO atmosphere overnight to give a precipitate. After removal of the solvent through filtered cannula, the resulting solid was washed with toluene (8 mL × 4) and ether (4 mL × 2), dried under vacuum to give the pale pink product. Yield: 144.6 mg, 66%.

<sup>1</sup>H NMR (300 MHz, Methylene Chloride-*d*<sub>2</sub>) δ 8.51 (s, 1H), 7.84 – 7.65 (m, 8H), 7.65 – 7.55 (m, 6H), 7.54 – 7.43 (m, 6H), 3.55 (br, s, 2H), 2.99 (br, s, 4H), 2.52 (br, s, 2H). {<sup>1</sup>H}<sup>13</sup>C NMR (101 MHz, Methylene Chloride-*d*<sub>2</sub>) δ 133.58 (t, *J* = 25.9 Hz), 132.19 (t, *J* = 5.4 Hz), 131.17 (d, *J* = 31.5 Hz), 129.02 (dt, *J* = 32.1, 5.3 Hz), 52.15, 33.76 (t, *J* = 12.2 Hz). {<sup>1</sup>H}<sup>31</sup>P NMR δ 72.82 (s).

Anal. Calc: C, 60.88; H, 4.94; N, 2.37. Observed: C, 61.49; H, 4.98; N, 3.21.

IR (ATR): 2004 cm<sup>-1</sup>(CO), 1926 cm<sup>-1</sup>(CO)

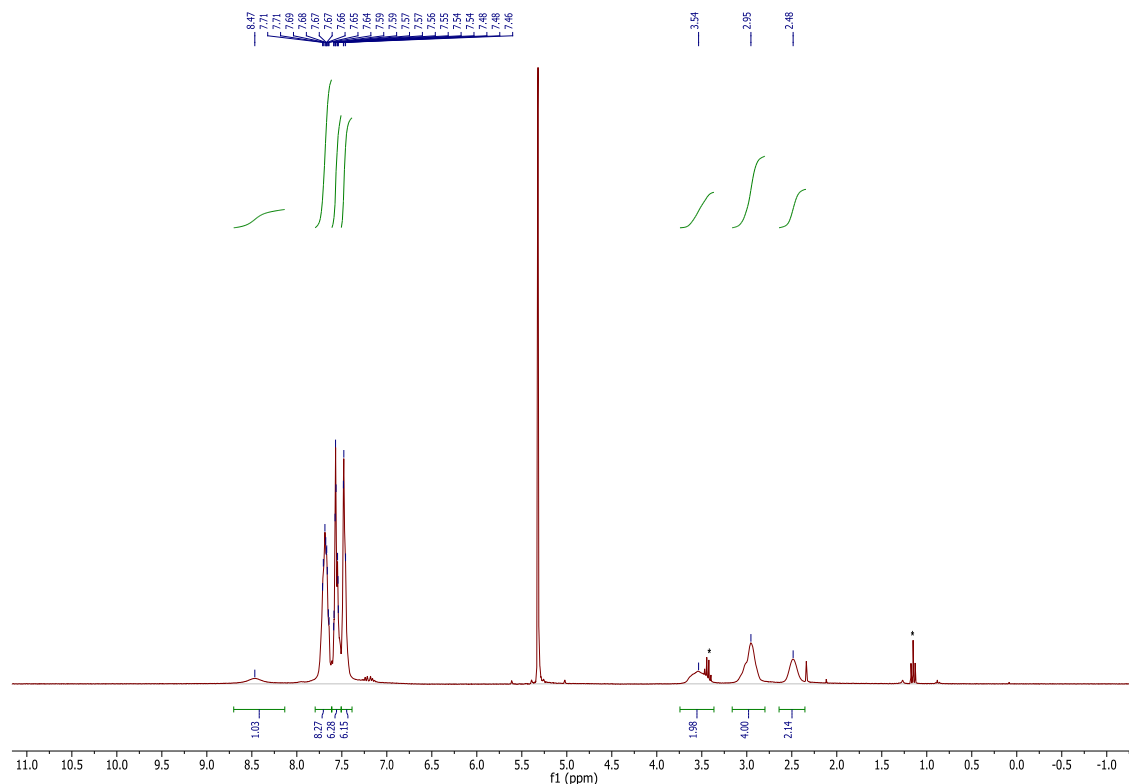

**Figure S6** <sup>1</sup>H NMR (CD<sub>2</sub>Cl<sub>2</sub>) spectrum of complex 9 (asterisk denote residual ether peaks)

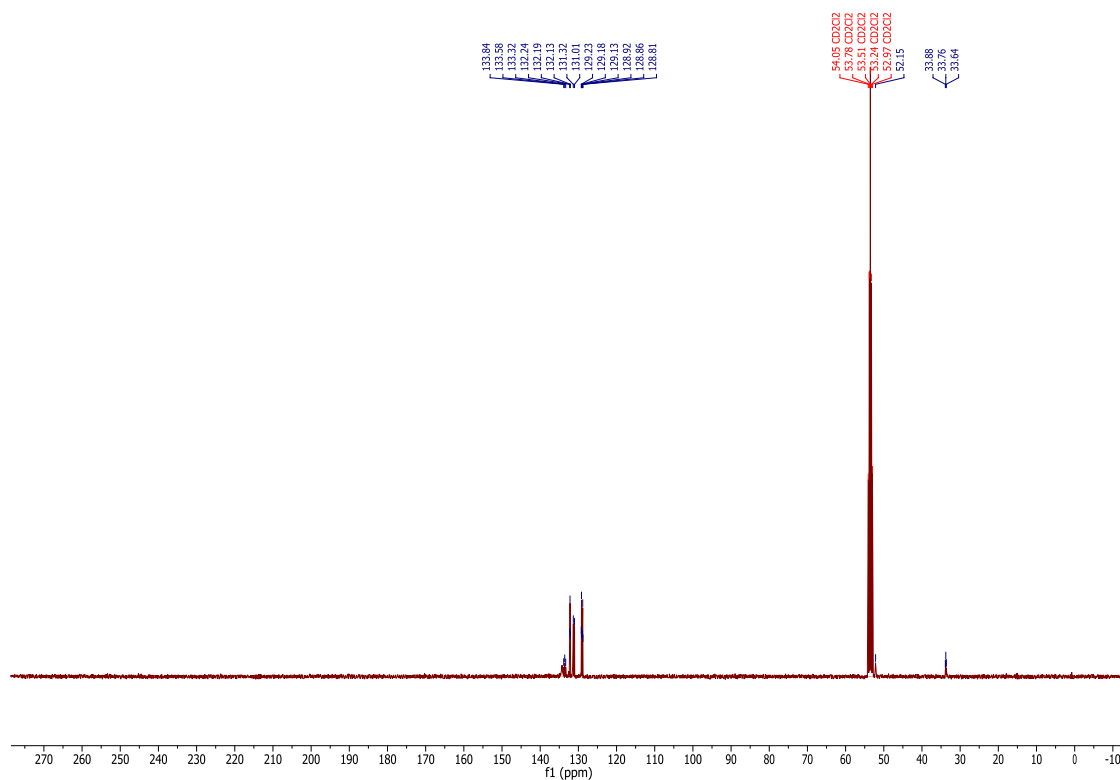

Figure S7  $\{^1\text{H}\}^{13}\text{C}$  ( $\text{CD}_2\text{Cl}_2$ ) spectrum of complex **9**

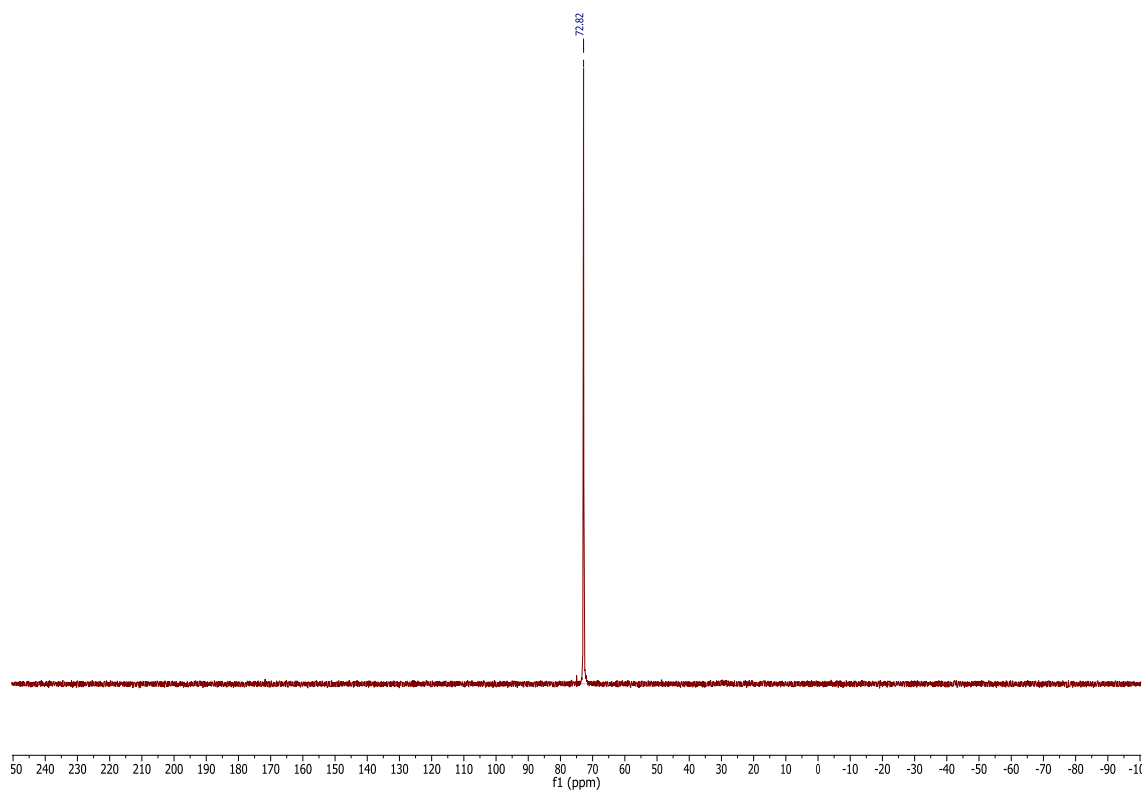

Figure S8  $^{31}\text{P}$  ( $\text{CD}_2\text{Cl}_2$ ) spectrum of complex **9**

## 2.4 Preparation of Co(I) complex 10

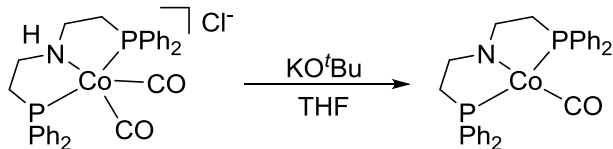

(<sup>Ph</sup>PNP)Co(CO)<sub>2</sub>Cl (118.4 mg, 0.20 mmol) was dissolved in 5 mL THF (not completely dissolved). KO<sup>t</sup>Bu (22.4 mg, 0.20 mmol) in 2 mL THF was added to this suspension at -40 °C, and the solid dissolved gradually and the solution turned to dark red. After one hour, the cooling bath was removed and the system was stirred for another hour at r.t. before the solvent was removed under vacuum. The resulting solid was extracted with toluene (4 mL × 4), filtered through Celite, the solvent removed under vacuum to give a red solid product. Yield: 75.6 mg, 72%.

Crystals suitable for X-ray analysis were obtained by vapor diffusion of hexane into a concentrated benzene solution.

<sup>1</sup>H NMR (400 MHz, Benzene-*d*<sub>6</sub>) (400 MHz, Benzene-*d*<sub>6</sub>) δ 8.03 – 7.77 (m, 8H), 7.11 – 6.95 (m, 12H), 3.42 – 3.03 (m, 4H), 2.67 – 2.52 (m, 4H). {<sup>1</sup>H}<sup>13</sup>C NMR (101 MHz, Benzene-*d*<sub>6</sub>) δ 135.05 (t, *J* = 20.2 Hz), 132.66 (t, *J* = 6.1 Hz), 129.43, 128.25 (t, *J* = 4.7 Hz), 57.71 (t, *J* = 8.6 Hz), 33.54 (t, *J* = 11.7 Hz). carbonyl carbon resonance not observed. {<sup>1</sup>H}<sup>31</sup>P NMR δ 76.17 (s, br).

Anal. Calc: C, 66.04; H, 5.35; N, 2.66. Observed: C, 65.78; H, 5.31; N, 2.31.

IR (ATR): 1873 cm<sup>-1</sup>(CO)

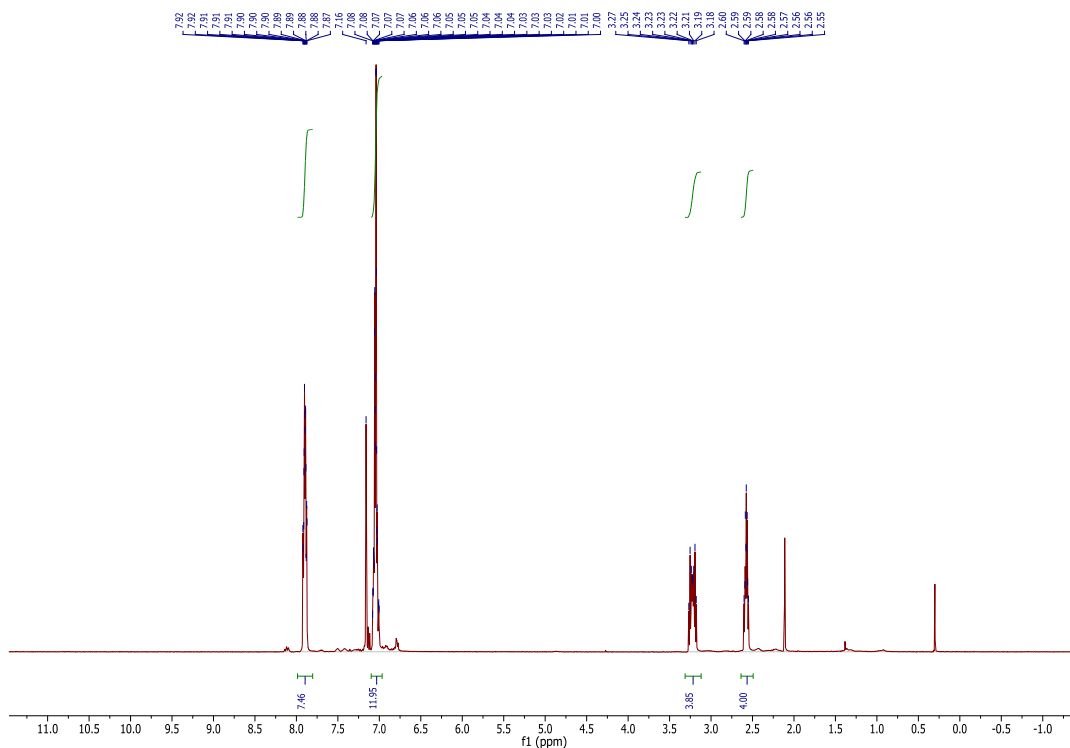

Figure S9 <sup>1</sup>H NMR (C<sub>6</sub>D<sub>6</sub>) spectrum of complex 10

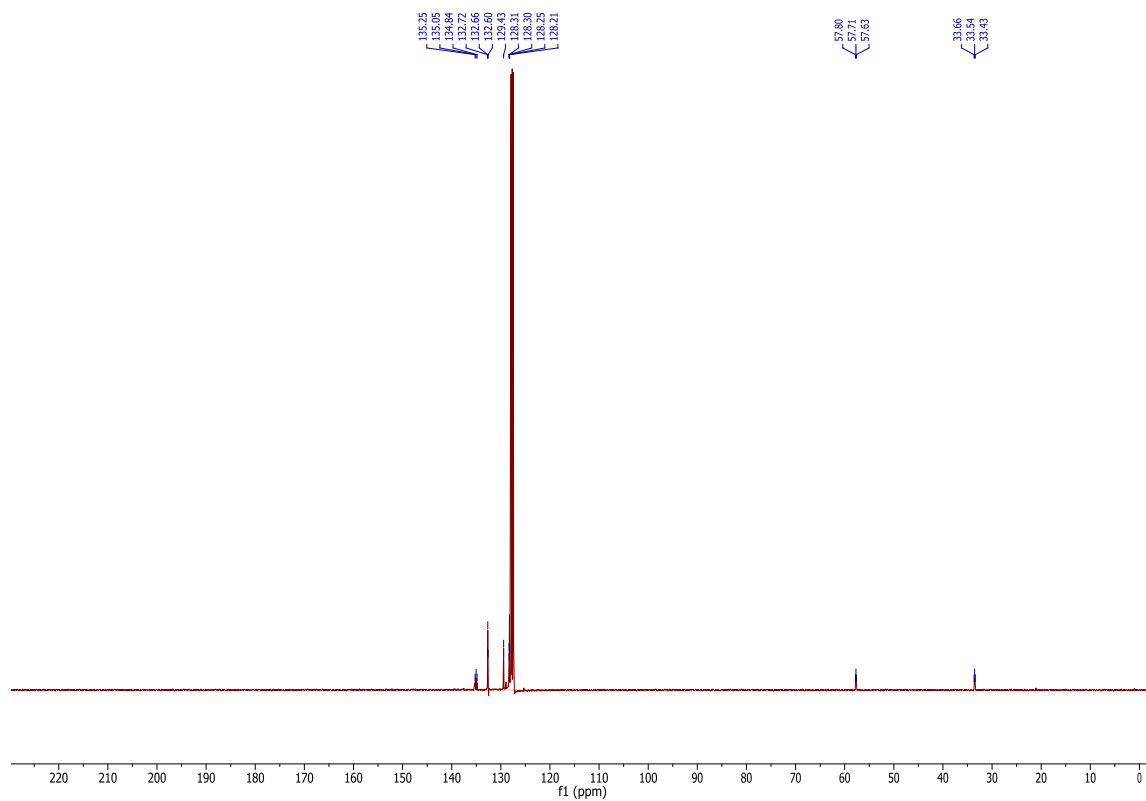

**Figure S10**  $\{^1\text{H}\}^{13}\text{C}$  ( $\text{C}_6\text{D}_6$ ) spectrum of complex **10**

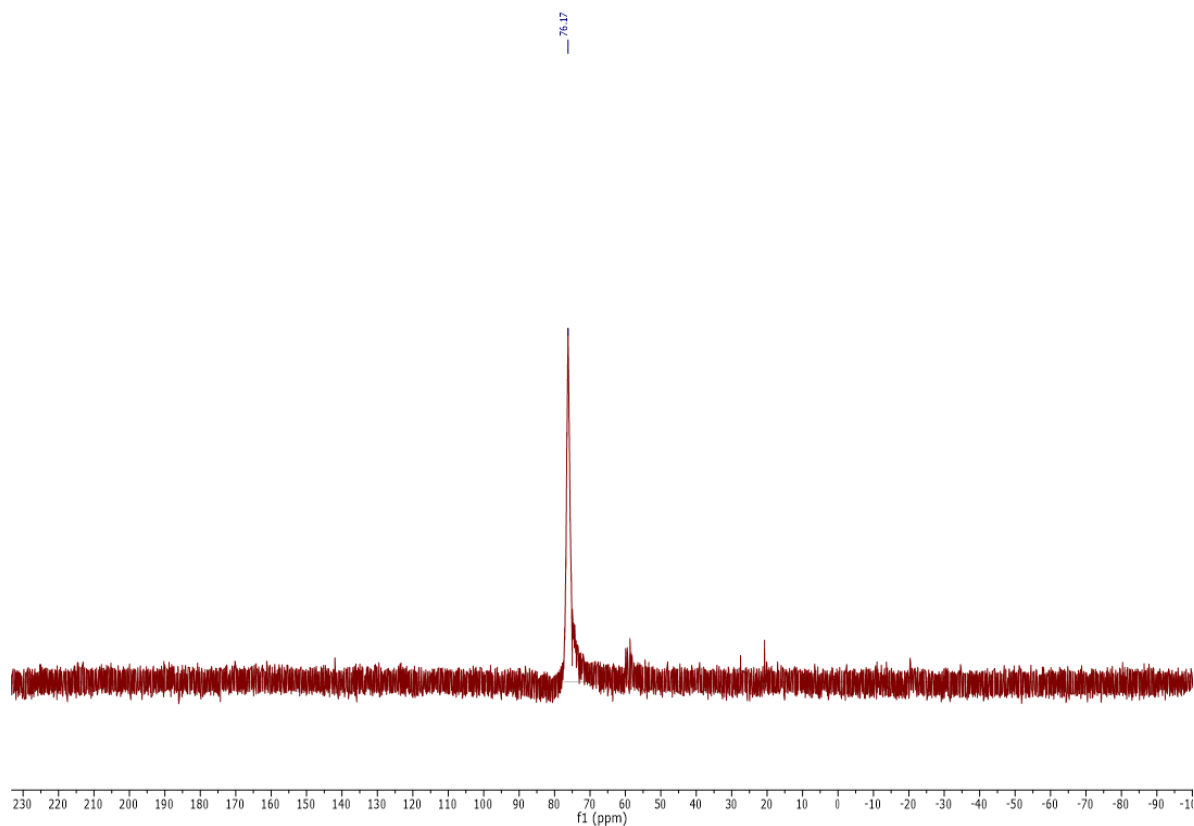

**Figure S11**  $^{31}\text{P}$  ( $\text{C}_6\text{D}_6$ ) spectrum of complex **10**

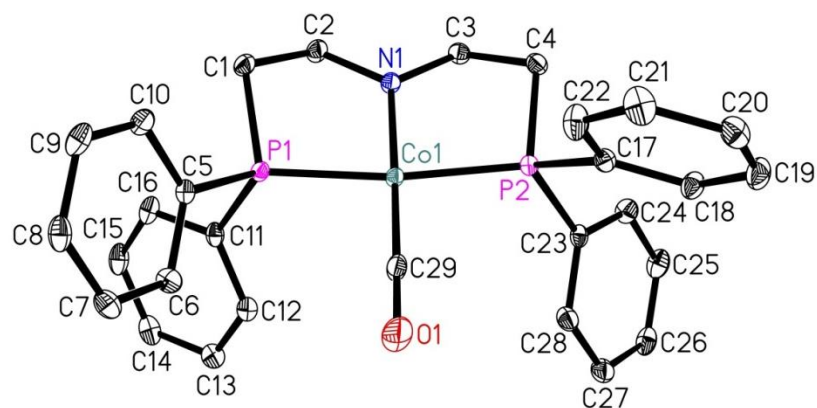

**Figure S12** Molecular structure of complex **10** with thermal ellipsoids at 30% probability. All hydrogens were eliminated for clarity.

**Table S4.** Selected bond lengths and angles of complex **10**:

| Bond distances [Å] |            | Bond Angles [°] |             |
|--------------------|------------|-----------------|-------------|
| C29-Co1            | 1.7032(18) | O1-C29-Co1      | 178.3(3)    |
| Co1-N1             | 1.8615(14) | C29-Co1-N1      | 178.03(10)  |
| Co1-P1             | 2.1589(5)  | C29-Co1-P1      | 94.43(6)    |
| Co1-P2             | 2.1742(5)  | N1-Co1-P1       | 84.59(5)    |
| C29-O1             | 1.165(2)   | C29-Co1-P2      | 95.56(6)    |
|                    |            | N1-Co1-P2       | 85.47(5)    |
|                    |            | P1-Co1-P2       | 169.934(19) |

### 3. General procedure for dehydrogenation of formic acid

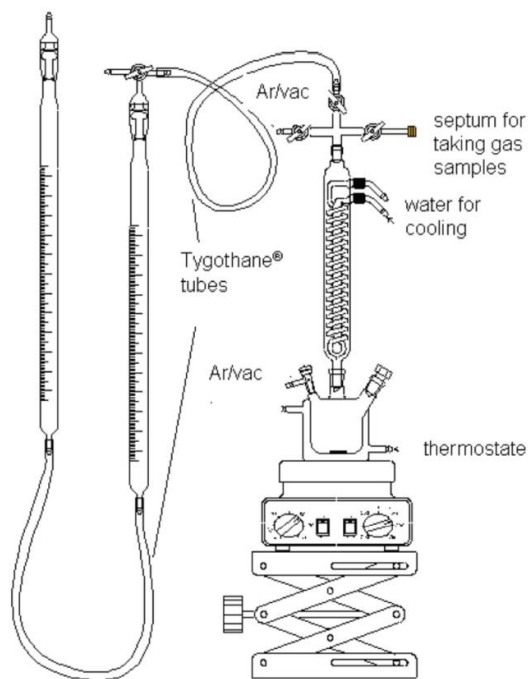

**Figure S13** Manual burette setup for measuring gas evolution

Substrates (11FA/10DMOA or HCOOK, FA, H<sub>2</sub>O) were given into a double walled reaction vessel. The system was heated to the desired reaction temperature and let equilibrate for 25 minutes. Then, the cobalt complex **3** (5.4 mg, 10 μmol), dissolved in 0.4 mL toluene, was added to the reaction mixture and immediately the gas evolution was started to be recorded in dependence of time.

In the case of the *in-situ* formed Co(I) catalyst, the corresponding Co(II) complex (10 μmol), suspended in 0.2 mL of toluene, and NaBEt<sub>3</sub>H (0.2 mL, 1.0 M in toluene) were mixed at room temperature and stirred for 15 minutes before adding it to the system for dehydrogenation reaction. All experiments (except the experiment applying catalyst **2** in Figure 2) were performed at least twice. The standard deviation/average value was in general less than 10%, except for entries 2 (17% and 7 % after 1 and 3 hours, respectively), 7 (14%, 12%), 9 (23%, 21%), 10 (18%, 28%) and 15 (39%, 16%) in Table 1.

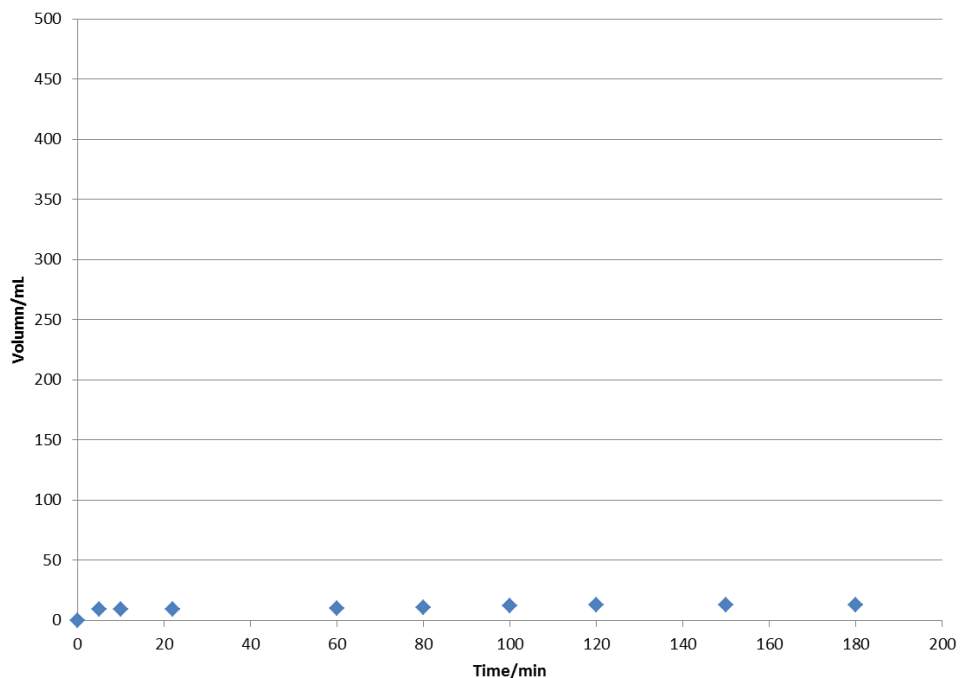

**Figure S14.** Gas volume measured in blank reaction in aqueous system at 60 °C in the absence of any catalyst.

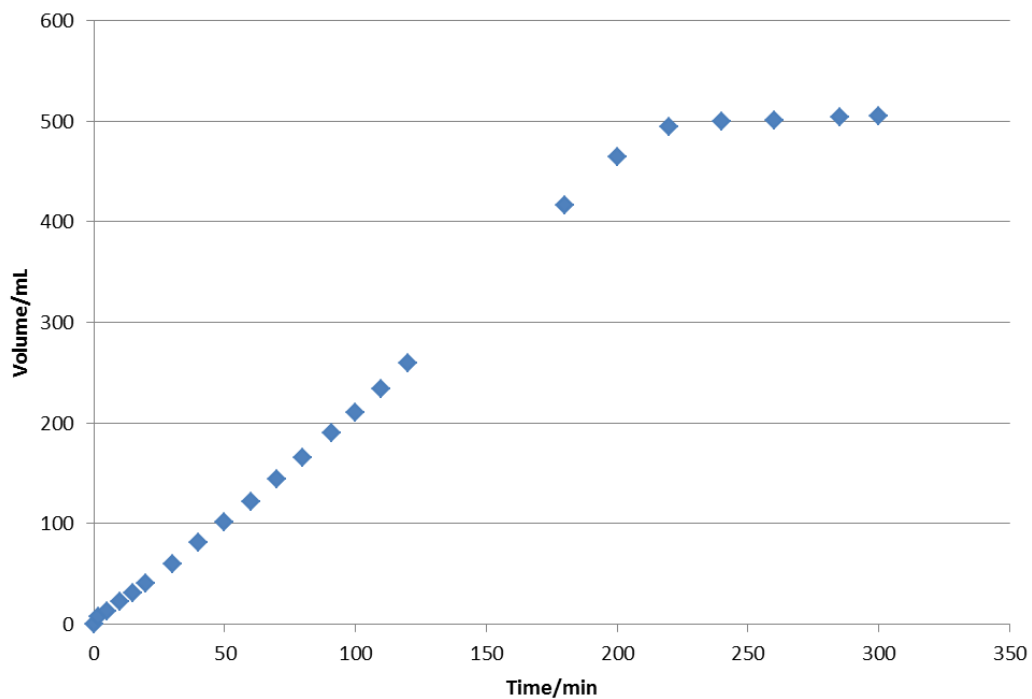

**Figure S15** Gas evolution curve at 60 °C. Conditions: formic acid (10 mmol), potassium formate (10 mmol), water (3.62 mL), complex **4** (10  $\mu$ mol) with *in-situ* treatment with two equivalent of  $\text{NaBEt}_3\text{H}$ .



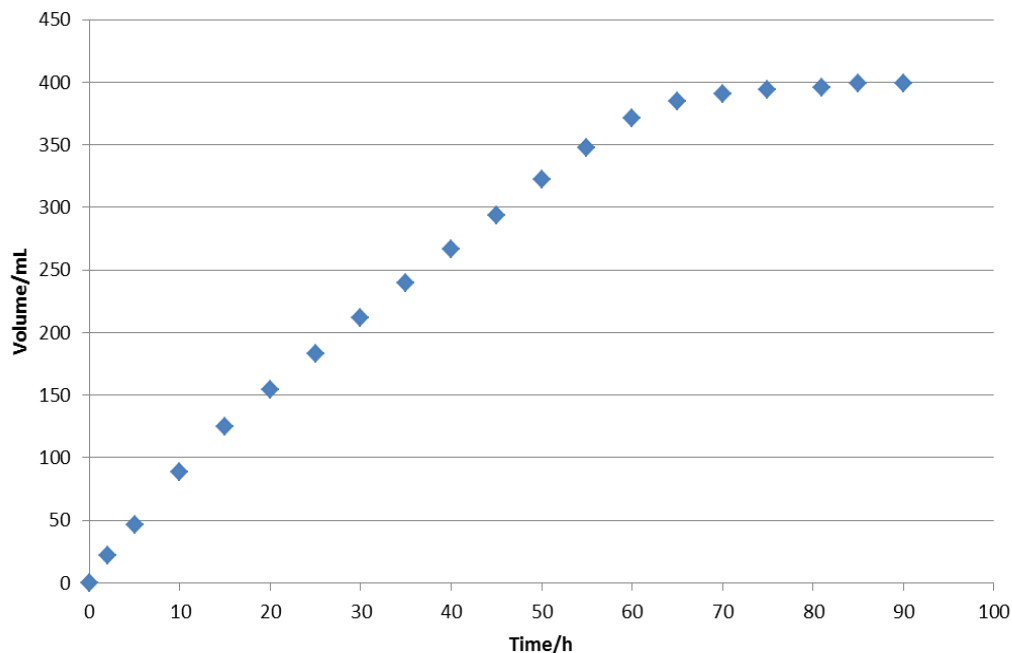

**Figure S16** Gas evolution curve at 80 °C. Conditions: formic acid (10 mmol), potassium formate (40 mmol), water (3.62 mL), complex **3** (10  $\mu$ mol).

**Table S5.** Summary of initial TOF at different pH value. All reactions were conducted at 60 °C, with complex **4** (10  $\mu$ mol) under *in-situ* treatment with two equivalents of NaBEt<sub>3</sub>H, the volume of formic acid and water is 4 mL in all cases. Initial TOF was measured as the first 20 minutes of the reaction.

| Entry | HCO <sub>2</sub> H (mmol) | HCO <sub>2</sub> K (mmol) | Initial pH | Initial TOF (/h) | V <sub>1h</sub> (mL) | V <sub>3h</sub> (mL) |
|-------|---------------------------|---------------------------|------------|------------------|----------------------|----------------------|
| 1     | 10                        | 40                        | 5.4        | 246              | 134                  | 426                  |
| 2     | 10                        | 20                        | 4.8        | 240              | 133                  | 448                  |
| 3     | 10                        | 10                        | 3.8        | 240              | 125                  | 436                  |
| 4     | 20                        | 10                        | 3.6        | 148              | 69                   | 168                  |
| 5     | 10                        | 5                         | 3.5        | 166              | 71                   | 200                  |
| 6     | 20                        | 20                        | 4.0        | 185              | 102                  | 292                  |
| 7     | 10                        | 0                         | 1.1        | 49               | 14                   | 26                   |
| 8     | 0                         | 10                        | 11.7       | 43               | 12                   | 22                   |

#### 4. Summary of tested dehydrogenation of formic acid using Co(II) complexes

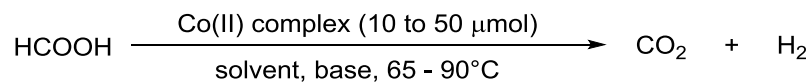

Tested Co(II) complexes

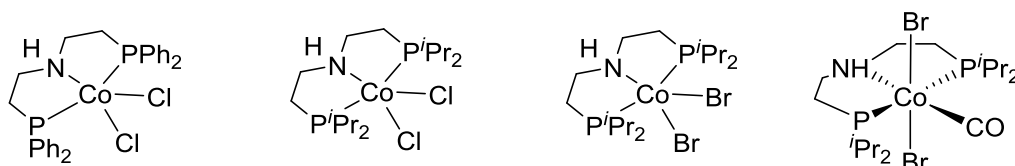

Tested solvent: toluene, triglyme, proplene, propylene carbonate

Tested base: trimethylamine, N,N-dimethyloctylamine

#### 5. Long term experiments

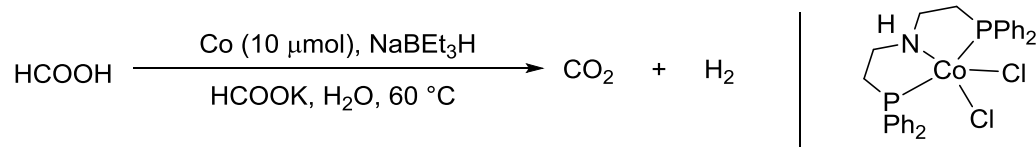

Initial conditions: HCOOH (50 mmol), HCOOK (50 mmol), H<sub>2</sub>O (18.1 mL), PNP-Ph-CoCl<sub>2</sub> (5.7 mg, 10 μmol) under *in-situ* treatment with two equivalent of NaBEt<sub>3</sub>H. 1.5 mL (39.8 mmol) FA was added to the system to restore the FA concentration after 16.5h.

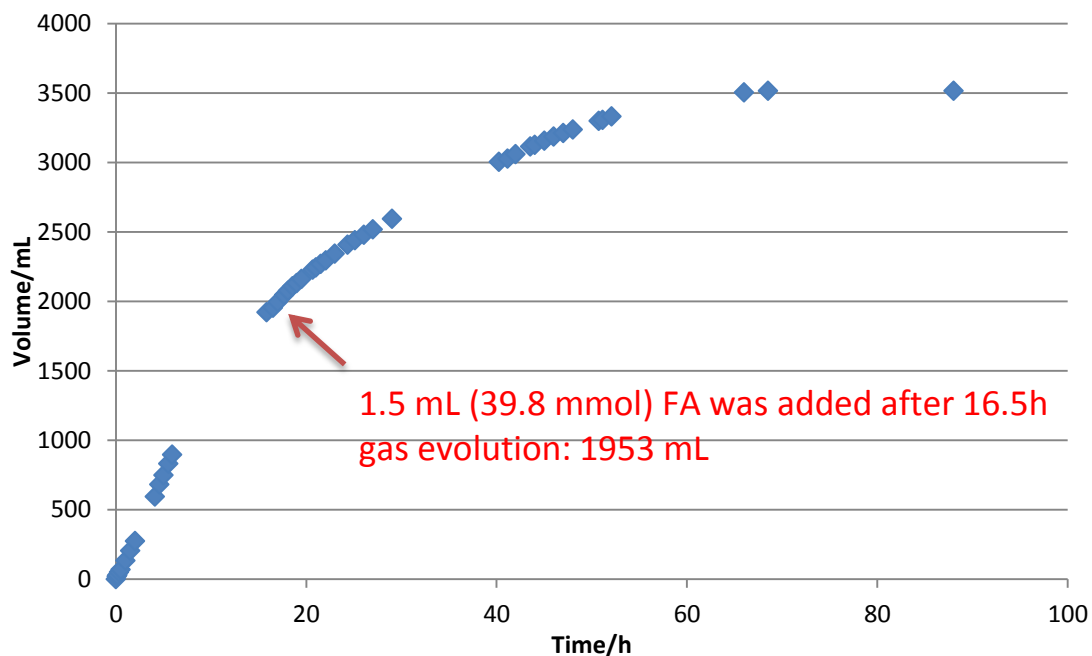

Figure S17 Gas evolution of a long term experiment

## 6. KIE experiments

KIE experiments were conducted either under optical aqueous conditions or in 11FA/10DMOA mixture

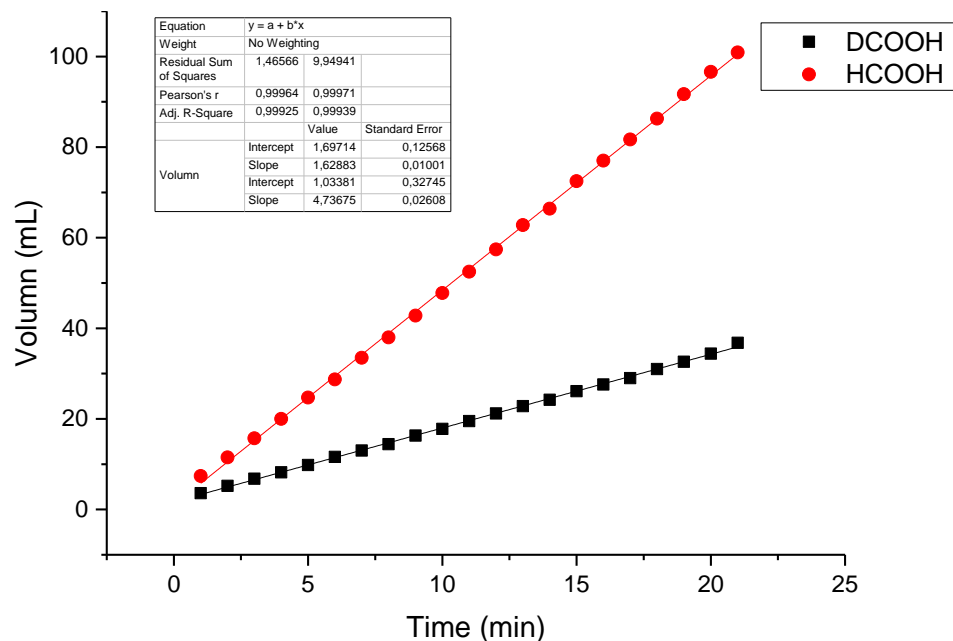

**Figure S18.** KIE experiment in 11FA/10DMOA mixture; conditions: 11FA/10DMOA (5 mL), complex **4** (10  $\mu\text{mol}$ ) with *in-situ* treatment with two equivalents of  $\text{NaBEt}_3\text{H}$ .

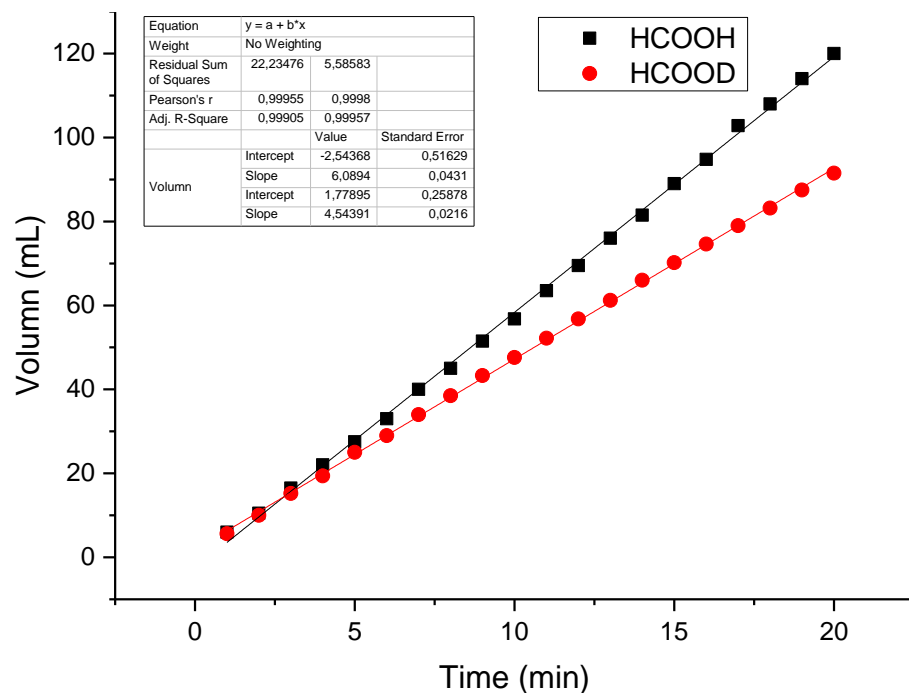

**Figure S19.** KIE experiment in 11FA/10DMOA mixture; conditions: 11FA/10DMOA (5 mL), complex **4** (10  $\mu\text{mol}$ ) with *in-situ* treatment with two equivalents of  $\text{NaBEt}_3\text{H}$ .

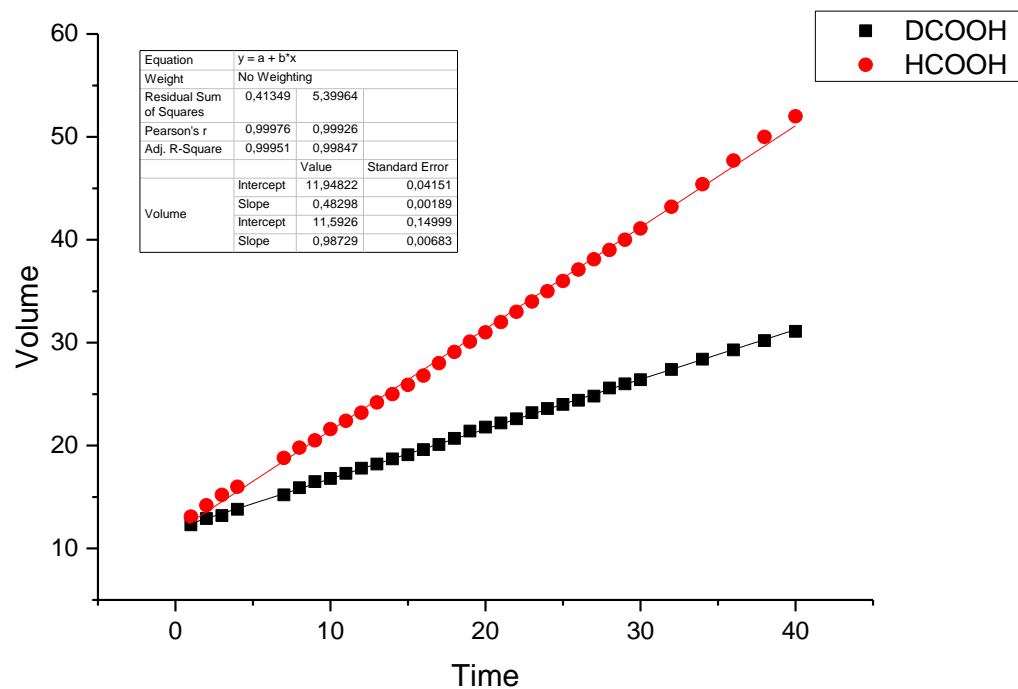

**Figure S20.** KIE experiment in aqueous system; conditions: formic acid (10 mmol), potassium formate (10 mmol), water (3.62 mL), complex **4** (10  $\mu$ mol) with *in-situ* treatment with two equivalents of  $\text{NaBEt}_3\text{H}$ .

## 7. Additional experiment regarding mechanism study

### 7.1 CO poisoning experiment

A typical dehydrogenation reaction was performed at 60 °C. Conditions: formic acid (10 mmol), potassium formate (10 mmol), water (3.62 mL), complex **4** (10 μmol) with *in-situ* treatment with two equivalents of NaBEt<sub>3</sub>H. After one hour 10 mL of CO was bubbled through the system with an air tight syringe within one minute (the gas collection was stopped during this time and continued afterwards.) The curve of gas evolution is shown below:

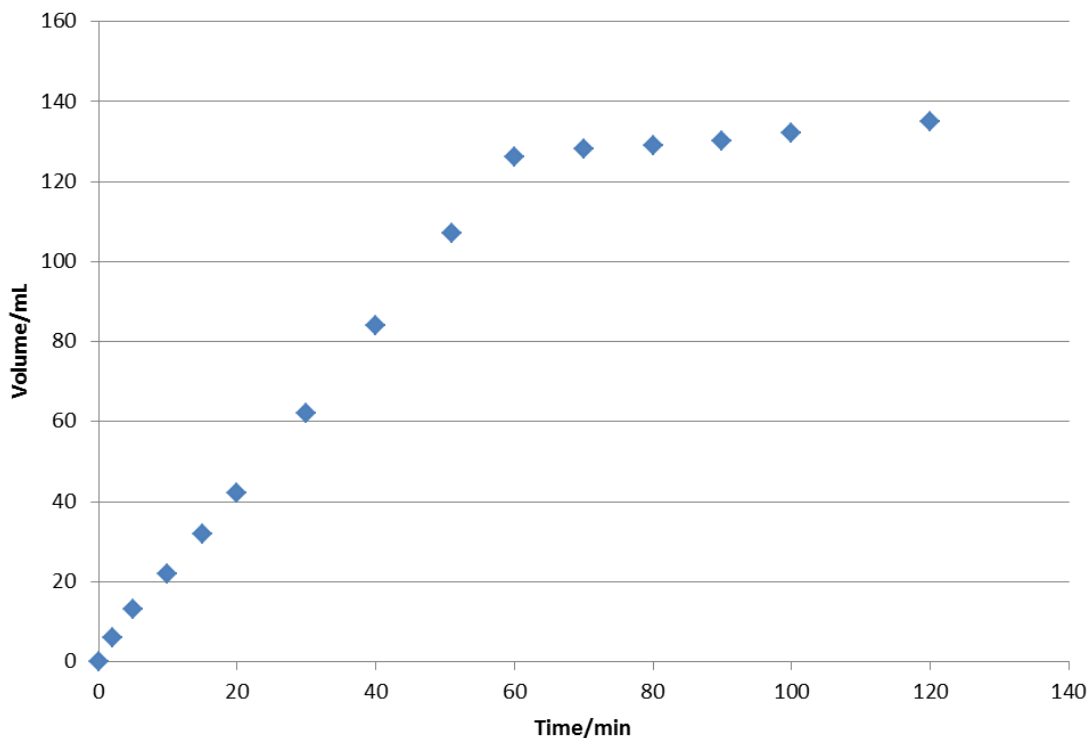

Figure S21 FA dehydrogenation reaction with CO poisoning

### 7.2 Thiourea poisoning experiment<sup>[4]</sup>

A typical dehydrogenation reaction was performed at 60 °C using *N,N'*-dibutylthiourea as a strongly binding catalyst poison. Applying 0.2 eq. or 0.5 eq. of *N,N'*-dibutylthiourea the system only partially deactivated the system. Conditions: formic acid (10 mmol), potassium formate (10 mmol), water (3.62 mL), complex **4** (10 μmol) with *in-situ* treatment with two equivalents of NaBEt<sub>3</sub>H, *N,N'*-dibutylthiourea (0.2 or 0.5 eq).

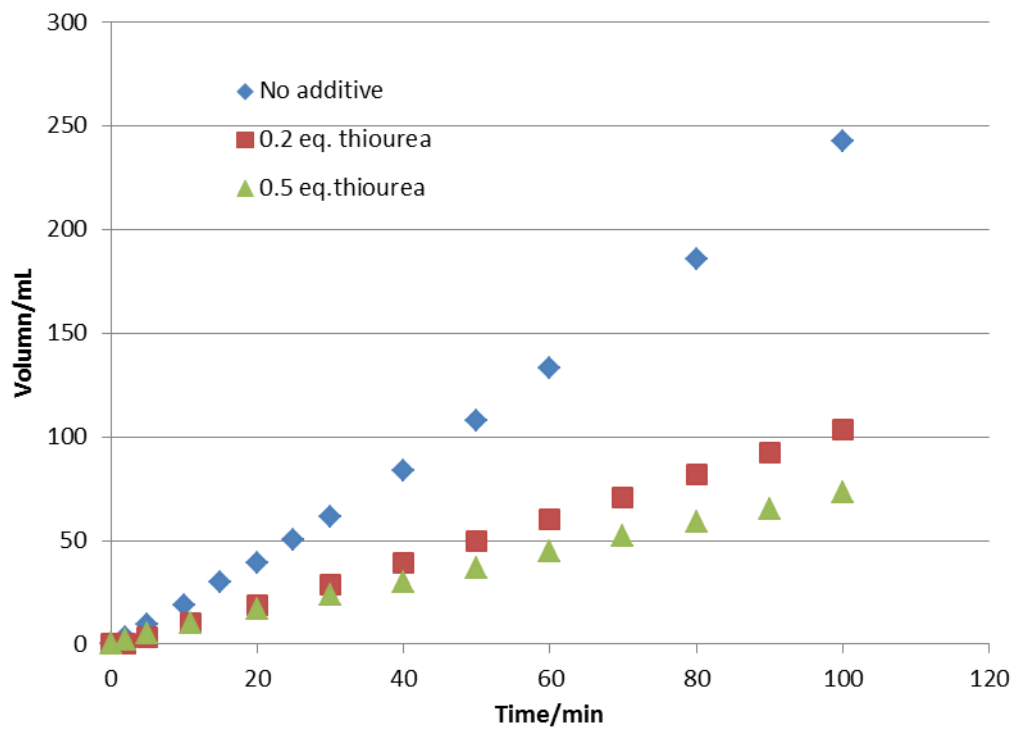

Figure S22 Thiourea poisoning experiment

## 8. Computational Details

All calculations were carried out by using the Gaussian 16 program.<sup>[5]</sup> All structures were optimized at the B3PW91<sup>[6]</sup> level of density functional theory (DFT) with the TZVP<sup>[7]</sup> basis set. All optimized structures were characterized either as energy minimums without imaginary frequencies or transition states with only one imaginary vibrational mode by frequency calculations. The thermal correction to Gibbs free energy at 298 K from frequency analysis was added to the total electronic energy, and the corrected Gibbs free energy ( $\Delta G$ ) at 298 K was used for discussion and comparison.

In addition, we carried out self-consistent reaction field (SCRF) structure optimization and frequency calculation at the M06L<sup>[8-9]</sup>/TZVP level using the solvation model based on solute electron density (SMD)<sup>[10]</sup> and water as solvent to estimate the solvation effect (M06L-SCRF). At first we have scaled the computed results on the basis of the experimental results; and this is because that recently computational study for the structures and stability as well as catalytic activity of cobalt PNP pincer in acetophenone hydrogenation used the M06L method under the consideration of solvation effect.<sup>[11]</sup> In our benchmark computation, we used the reaction in in Figure 3 with the formation of either the monocarbonyl complex **10** or the dicarbonyl complex **10a**. It is found that M06L favors the dicarbonyl amido complex (**10a**, trigonal bipyramidal) instead of the monocarbonyl complex **10** (square planar) [**10a** = **10** + CO] both in gas phase and solution by 6.09 and 8.94 kcal/mol, respectively, and this disagrees with the experiment. In contrast, B3PW91 prefers complex **10** instead of the dicarbonyl complex **10a** by 2.90 and 1.20 kcal/mol in gas phase and in solution, respectively, and this agrees with the experiment. Indeed, monocarbonyl complex has been found for the *i*-Pr<sup>[12]</sup> and *t*-Bu<sup>[13]</sup> substituted counterpart. This rationalized the use of B3PW91 in our computations.

Nevertheless, we also computed the potential energy surface by using M06L-SCRF and the computed Gibbs free energy surface is shown in Figure S1 for comparison. Despite some minor differences, both B3PW91 and M06L-SCRF gave very similar results.

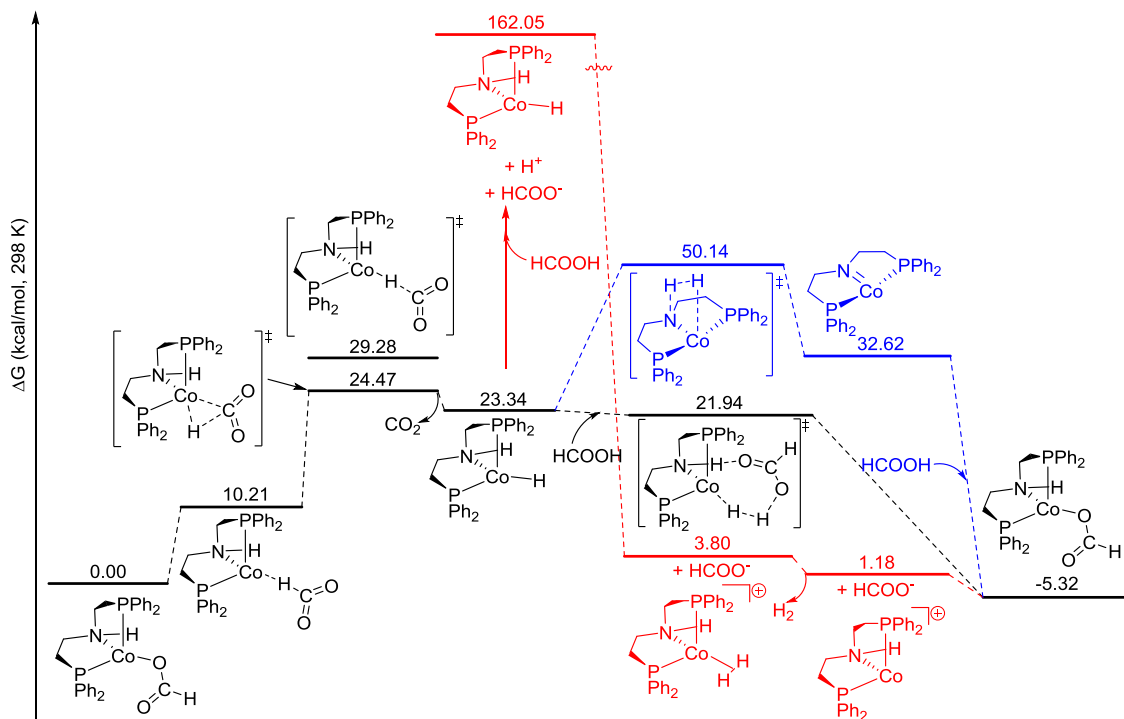

**Figure S23.** Gibbs free energy profile for formic acid dehydrogenation at M06L/TZVP-SCRF(SMD/H<sub>2</sub>O) level.

Interestingly, for the O-coordinated formate species, the H-bonding between the second O atom and the H atom of the amine functionality cannot be located by using M06L functional. The H coordinated **3A2** is high in energy than **3A1** by 10.21 kcal/mol. It is worth noted that the C-H activation involving H-bonding between the O atom of formate and the H atom of the amine functionality cannot be located, instead the two configurations of transition state in the absence of H-bond were found. The corresponding transition states for the C-H activation (**TS3A2/3B**) has free energy barrier of 24.47 and 29.28 kcal/mol, respectively. The formation of CO<sub>2</sub> and amine complex **3B** is endergonic by 23.34 kcal/mol.

Starting from the parent amine complex **3B**, the direct H<sub>2</sub> elimination via the non-innocent mechanism has free energy barrier of 26.80 kcal/mol and is exergonic by 9.27 kcal/mol. The H<sub>2</sub> elimination via innocent mechanism has negative Gibbs free energy barrier of -14.07 kcal/mol and is highly exergonic (-37.93 kcal/mol). The third one involves the protonation of the Co-H group by formic acid and this step is very exergonic by 19.54 kcal/mol. As a result, the rate-determining step for formic acid dehydrogenation is the hydride transfer from formate to Co center.



**Table S6.** Energies for All Optimized Structures at B3PW91/TZVP level

|                                                                                                                     | Ee            | ZPE      | H(298.15)    | G(298.15)    |
|---------------------------------------------------------------------------------------------------------------------|---------------|----------|--------------|--------------|
| <b>HCOOH</b>                                                                                                        | -189.762022   | 0.033913 | -189.724004  | -189.75218   |
| <b>CO<sub>2</sub></b>                                                                                               | -188.580271   | 0.010286 | -188.566078  | -188.585337  |
| <b>H<sub>2</sub></b>                                                                                                | -1.178636     | 0.010066 | -1.165265    | -1.180063    |
| <b>CO</b>                                                                                                           | -113.304331   | 0.005076 | -113.29595   | 113,318374   |
| <b>proton</b>                                                                                                       | 0.000000      | 0        | 0.00236      | -0.01        |
| <b>HCOO-Anion</b>                                                                                                   | -189.198628   | 0.02009  | -189.174623  | 189.202331   |
| <b>H<sub>2</sub>O</b>                                                                                               | -76.430962    | 0.021369 | -76.405814   | -76.427232   |
| 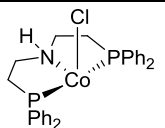<br><b>3-triplet</b>               | -3664.8206097 | 0.499848 | -3664.287584 | -3664.390742 |
| <br><b>3-singlet</b>               | -3664.759033  | 0.500736 | -3664.2255   | -3664.325381 |
| <br><b>3-Square-Planar-singlet</b> | -3664.786629  | 0.500645 | -3664.253304 | -3664.353472 |
| <br><b>10-singlet</b>             | -3317.314342  | 0.494726 | -3316.786847 | -3316.887914 |
| <br><b>10-triplet</b>            | 3317.3047093  | 0.492373 | -3316,778633 | -3316.88425  |
| <br><b>10a-singlet</b>           | -3430.63398   | 0.502223 | 3430.096512  | -3430.20167  |
| <br><b>3B-triplet</b>            | -3205.147625  | 0.502872 | -3204.612494 | -3204.713843 |
| <br><b>mer-3B-triplet</b>        | -3205.145198  | 0.503968 | -3204.609595 | -3204.708329 |
| <br><b>3B-singlet</b>            | -3205.103015  | 0.505967 | -3204.565943 | -3204.661101 |

|                                                                                                                                      |                          |                                                   |              |              |
|--------------------------------------------------------------------------------------------------------------------------------------|--------------------------|---------------------------------------------------|--------------|--------------|
| 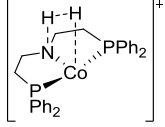 <p><b>mer-TS(3B/3A1)-triplet</b><br/>(favored)</p> | -3205.11627              | 0.497772<br>NImag= 1<br>(-1048 cm <sup>-1</sup> ) | -3204.587084 | -3204.685731 |
|  <p><b>TS(3B/3A1)-triplet</b></p>                   | -3205.107662             | 0.497442<br>NImag= 1<br>(-755 cm <sup>-1</sup> )  | -3204.578568 | -3204.678065 |
|  <p><b>3C-triplet</b></p>                           | -3203.956708             | 0.484463                                          | -3203.441253 | -3203.540106 |
|  <p><b>3C-singlet</b></p>                           | -3203.9195689            | 304.28563                                         | -3203.403834 | -3203.500577 |
|  <p><b>3A1-triplet (favored)</b></p>                | -3393.786027             | 0.522091                                          | -3393.228841 | -3393.336026 |
|  <p><b>3A1-singlet</b></p>                         | -3393.728782             | 0.523018                                          | -3393.171289 | -3393.274523 |
|  <p><b>3A1'-triplet</b></p>                       | -3393.779491             | 0.521781                                          | -3393.222324 | -3393.330094 |
|  <p><b>3A1-singlet</b></p>                        | -3393.728782             | 0.523018                                          | -3393.171289 | -3393.274523 |
|  <p><b>3A2-triplet</b></p>                        | -3393.741847             | 0.519517                                          | -3393.18692  | -3393.295747 |
|  <p><b>TS3(A2/3B)-triplet</b></p>                 | -3393.731215             | 0.515726<br>NImag=1<br>(-240 cm <sup>-1</sup> )   | -3393.179945 | -3393.290165 |
|  <p><b>TS3'(A2/3B)-triplet</b></p>                | Not located<br>at B3PW91 |                                                   |              |              |

|                                                                                                                                     |              |                                                   |              |              |
|-------------------------------------------------------------------------------------------------------------------------------------|--------------|---------------------------------------------------|--------------|--------------|
| 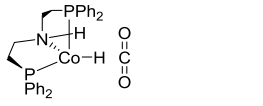 <p><b>CO<sub>2</sub> dissociated</b></p>          | -3393.733309 | 0.515905                                          | -3393.180947 | -3393.293888 |
|  <p><b>TS3(3B/3A1)-triplet</b></p>                 | -3394.932905 | 0.535719<br>NImag = 1<br>(-523 cm <sup>-1</sup> ) | -3394.361326 | -3394.470813 |
|  <p><b>3BH<sup>+</sup>-triplet</b></p>             | -3205.58586  | 0.514925                                          | 3205.039266  | -3205.136723 |
|  <p><b>3BH<sub>2</sub><sup>+</sup>-triplet</b></p> | 3204.39546   | 0.499499                                          | 3203.86456   | -3203.965378 |
| <b>CO-SCRF</b>                                                                                                                      | 113.295698   | 0.005049                                          | -113.287344  | 113.309768   |
|  <p><b>10-singlet-SCRF</b></p>                     | -3317.328055 | 0.494513                                          | -3316.800799 | -3316.901463 |
|  <p><b>10a-singlet-SCRF</b></p>                    | -3430.642299 | 0.502075                                          | -3430.105153 | -3430.209317 |

**Table S7.** Energies for All Optimized Structures at M06L-SCRF/TZVP-SCRF(SMD,H<sub>2</sub>O) level

|                                                                                                                                             | Ee            | ZPE                                                | H(298.15)    | G(298.15)    |
|---------------------------------------------------------------------------------------------------------------------------------------------|---------------|----------------------------------------------------|--------------|--------------|
| <b>HCOOH</b>                                                                                                                                | -189,815295   | 0.033524                                           | -189.777668  | -189.805843  |
| <b>CO<sub>2</sub></b>                                                                                                                       | -188,637958   | 0.010195                                           | -188.623851  | -188.64359   |
| <b>H<sub>2</sub></b>                                                                                                                        | -1,169050     | 0.009819                                           | -1.155926    | -1.170723    |
| <b>CO</b>                                                                                                                                   | -113,329746   | 0.005009                                           | -113.321432  | -113,343861  |
| <b>proton</b>                                                                                                                               | -0,215180     | 0                                                  | -0.21282     | -0.22518     |
| <b>HCOO-Anion</b>                                                                                                                           | -189.356146   | 0.020345                                           | -189.331882  | -189.359617  |
| <b>H<sub>2</sub>O</b>                                                                                                                       | -76.4544348   | 0.021206                                           | 76.429449    | -76.450879   |
| 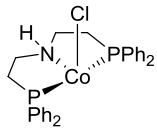<br><b>3-triplet-M06L-SCRF</b>                             | -3665.1863981 | 0.499972                                           | -3664.653609 | -3664.753213 |
| <br><b>3B-triplet-M06L-SCRF</b>                            | -3205.480223  | 0.503767                                           | -3204.945043 | -3205.040728 |
| <br><b>mer-3B-triplet-M06L-SCRF</b>                        | -3205.471709  | 0.503427                                           | -3204.936581 | -3205.034669 |
| <br><b>mer-TS(3B/3A1)-triplet-M06L-SCRF<br/>(favored)</b> | -3205.429823  | 0.497036<br>NImag = 1<br>(-1444 cm <sup>-1</sup> ) | -3204.9015   | -3204.99803  |
| <br><b>TS(3B/3A1)-triplet-M06L-SCRF</b>                  | -3205.429611  | 0.4971                                             | -3204.901304 | -3204.996878 |
| <br><b>3C-triplet-M06L-SCRF</b>                          | -3204.273527  | 0.483096                                           | 3203.760121  | -3203.855226 |
| <br><b>3C-singlet-M06L-SCRF</b>                          | 3204.2431555  | 0.484823                                           | 3203,727848  | -3203,822070 |
| <br><b>3A1-triplet-M06L-SCRF</b>                         | -3394.173253  | 0.521512                                           | 3393.616745  | 3393.721516  |
| <br><b>3A2-triplet-M06L-SCRF</b>                         | -3394.156543  | 0.521382                                           | -3393.600183 | -3393.705253 |

|                                                                                                                                                |              |                                                    |              |              |
|------------------------------------------------------------------------------------------------------------------------------------------------|--------------|----------------------------------------------------|--------------|--------------|
| 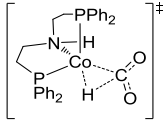 <p><b>TS(3A2/3B)</b>-triplet-M06L-SCRF<br/>(favored)</p>     | -3394.131605 | 0.516661<br>NImag = 1<br>(-468 cm <sup>-1</sup> )  | -3393.580593 | -3393.682521 |
|  <p><b>TS(3A2/3B)</b>'-triplet-M06L-SCRF</p>                  | -3394.120904 | 0.515991<br>NImag = 1<br>(-546 cm <sup>-1</sup> )  | -3393.569986 | -3393.674848 |
|  <p><b>3B-CO<sub>2</sub></b>-triplet-M06L-SCRF</p>            | -3394.133254 | 0.5177                                             | -3393.581045 | -3393.682791 |
|  <p><b>TS(3B/3A1)</b>-triplet-M06L-SCRF</p>                   | -3395.312665 | 0.534513<br>NImag = 1<br>(-1156 cm <sup>-1</sup> ) | -3394.742651 | -3394.8488   |
|  <p><b>3BH<sup>+</sup></b>-M06L-SCRF-Cation</p>               | -3205.966749 | 0.514621                                           | -3205.42001  | -3205.518099 |
|  <p><b>3B-H<sub>2</sub><sup>+</sup></b>-M06L-SCRF-Cation</p> | -3204,786178 | 0.499179                                           | -3204,256162 | -3204,351549 |
|  <p><b>10-singlet</b>-M06L-SCRF</p>                         | -3317.675069 | 0.49441                                            | -3317.148089 | -3317,247064 |
|  <p><b>10a-singlet</b>-M06L-SCRF</p>                        | -3431.037404 | 0.501352                                           | -3430.500841 | -3430,605176 |
| <p><b>CO-M06L</b></p>                                                                                                                          | -113.33834   | 0.00503                                            | -113.330005  | -113,352435  |
|  <p><b>10-singlet</b>-M06L</p>                              | -3317.666731 | 0.494885                                           | 3317.139326  | -3317,238046 |
|  <p><b>10a-singlet</b>-M06L</p>                             | -3431.032622 | 0.502027                                           | -3430.4954   | -3430,600182 |

**Table S8.** The Cartesian Coordinates (xyz) for All Optimized Structures at B3PW91/TZVP level

|                                                                                                                                                                                                                                                                                                                                                                                                                                                                                                                                                                                                                                                                                                                                                                                                                                                                                                                                                                                                                               |                                                                                                                                                                                                                                                                                                                                                                                                                                                                                                                                                                                                                                                                                                                                                                                                                                                                                                                                                                                                                               |
|-------------------------------------------------------------------------------------------------------------------------------------------------------------------------------------------------------------------------------------------------------------------------------------------------------------------------------------------------------------------------------------------------------------------------------------------------------------------------------------------------------------------------------------------------------------------------------------------------------------------------------------------------------------------------------------------------------------------------------------------------------------------------------------------------------------------------------------------------------------------------------------------------------------------------------------------------------------------------------------------------------------------------------|-------------------------------------------------------------------------------------------------------------------------------------------------------------------------------------------------------------------------------------------------------------------------------------------------------------------------------------------------------------------------------------------------------------------------------------------------------------------------------------------------------------------------------------------------------------------------------------------------------------------------------------------------------------------------------------------------------------------------------------------------------------------------------------------------------------------------------------------------------------------------------------------------------------------------------------------------------------------------------------------------------------------------------|
| <b>HCOOH</b><br>C 0.0000000 0.4195660 0.0000000<br>H -0.3810200 1.4495360 0.0000000<br>O 1.1572940 0.1133510 0.0000000<br>O -1.0273190 -0.4418210 0.0000000<br>H -0.6587810 -1.3391790 0.0000000                                                                                                                                                                                                                                                                                                                                                                                                                                                                                                                                                                                                                                                                                                                                                                                                                              | <b>CO<sub>2</sub></b><br>C 0.0000000 -0.0001260 0.0000000<br>O -0.6640350 -0.9497870 0.0000000<br>O 0.6640350 0.9498820 0.0000000                                                                                                                                                                                                                                                                                                                                                                                                                                                                                                                                                                                                                                                                                                                                                                                                                                                                                             |
| <b>H<sub>2</sub></b><br>H 0.0000000 0.0000000 0.3725550<br>H 0.0000000 0.0000000 -0.3725550                                                                                                                                                                                                                                                                                                                                                                                                                                                                                                                                                                                                                                                                                                                                                                                                                                                                                                                                   | <b>CO</b><br>C 0.0000000 0.0000000 -0.6436620<br>O 0.0000000 0.0000000 0.4827470                                                                                                                                                                                                                                                                                                                                                                                                                                                                                                                                                                                                                                                                                                                                                                                                                                                                                                                                              |
| <b>H<sup>+</sup></b><br>H 0.0000000 0.0000000 0.0000000                                                                                                                                                                                                                                                                                                                                                                                                                                                                                                                                                                                                                                                                                                                                                                                                                                                                                                                                                                       | <b>HCOO<sup>-</sup></b><br>C 0.0000000 0.3123670 0.0000000<br>H -0.0012500 1.4560280 0.0000000<br>O 1.1344850 -0.2073760 0.0000000<br>O -1.1343280 -0.2089020 0.0000000                                                                                                                                                                                                                                                                                                                                                                                                                                                                                                                                                                                                                                                                                                                                                                                                                                                       |
| <b>H<sub>2</sub>O</b><br>O 0.0000000 0.0000000 0.1171090<br>H 0.0000000 0.7612740 -0.4684350<br>H 0.0000000 -0.7612740 -0.4684350                                                                                                                                                                                                                                                                                                                                                                                                                                                                                                                                                                                                                                                                                                                                                                                                                                                                                             |                                                                                                                                                                                                                                                                                                                                                                                                                                                                                                                                                                                                                                                                                                                                                                                                                                                                                                                                                                                                                               |
| 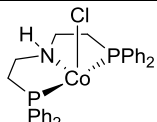<br><b>3-triplet</b><br>C -1.7610300 -0.2514230 2.1014710<br>H -1.0846320 0.5134950 2.4893930<br>H -2.7419140 -0.0940340 2.5574830<br>C -1.2521700 -1.6491610 2.4439870<br>H -1.1340610 -1.7449850 3.5323900<br>H -2.0038830 -2.3803990 2.1365610<br>C 1.2524130 -1.6481460 2.4442660<br>H 2.0046210 -2.3791700 2.1375430<br>H 1.1339210 -1.7434490 3.5326700<br>C 1.7607690 -0.2503370 2.1012210<br>H 2.7414870 -0.0923650 2.5573950<br>H 1.0839790 0.5145000 2.4886180<br>C -3.4763120 -0.8016260 -0.1570450<br>C -3.5115300 -2.0203320 -0.8339460<br>H -2.5821240 -2.4947140 -1.1377200<br>C -4.7308050 -2.6248680 -1.1232410<br>H -4.7454630 -3.5721130 -1.6510240<br>C -5.9196840 -2.0153790 -0.7474820<br>H -6.8695830 -2.4852780 -0.9783510<br>C -5.8911850 -0.7947640 -0.0799770<br>H -6.8181610 -0.3099590 0.2070600<br>C -4.6767830 -0.1907290 0.2124510<br>H -4.6655520 0.7700940 0.7163880<br>C -2.1356490 1.7299930 -0.0181200 | <br><b>3-singlet</b><br>C -1.8926710 -0.4654330 2.0719000<br>H -1.3258940 0.3338530 2.5556650<br>H -2.8944900 -0.4908890 2.5062330<br>C -1.2025700 -1.8048640 2.2534920<br>H -1.0664000 -2.0442550 3.3145520<br>H -1.8189910 -2.5921080 1.8138120<br>C 1.2831310 -1.4395910 2.3779820<br>H 2.0793540 -2.1589610 2.1733270<br>H 1.0320240 -1.5239630 3.4405140<br>C 1.7823720 -0.0449070 2.0390840<br>H 2.7361010 0.1466030 2.5360490<br>H 1.0730320 0.7210690 2.3564410<br>C -3.5194690 -0.9473070 -0.2761390<br>C -3.4339970 -2.1918900 -0.9012260<br>H -2.4565530 -2.6234320 -1.1030120<br>C -4.5915980 -2.8701240 -1.2690830<br>H -4.5134770 -3.8363990 -1.7553420<br>C -5.8377790 -2.3079340 -1.0282390<br>H -6.7392990 -2.8347630 -1.3218700<br>C -5.9283510 -1.0613430 -0.4170150<br>H -6.8998860 -0.6137750 -0.2361080<br>C -4.7759980 -0.3831050 -0.0447830<br>H -4.8568020 0.5955960 0.4158490<br>C -2.3686140 1.6480230 0.1050860 |

|                                                            |             |             |                          |             |             |
|------------------------------------------------------------|-------------|-------------|--------------------------|-------------|-------------|
| C -2.07148900                                              | 2.19992100  | -1.33224600 | C -2.22252300            | 2.25645500  | -1.14433000 |
| H -1.83225000                                              | 1.51058500  | -2.13577600 | H -1.85625700            | 1.67506100  | -1.98456300 |
| C -2.30877200                                              | 3.53554800  | -1.61972600 | C -2.53210000            | 3.59645600  | -1.32303600 |
| H -2.25979600                                              | 3.88213900  | -2.64611200 | H -2.41481400            | 4.04975800  | -2.30109900 |
| C -2.59823300                                              | 4.42936500  | -0.59484000 | C -2.97846200            | 4.35915800  | -0.24940100 |
| H -2.77702100                                              | 5.47530500  | -0.81786100 | H -3.21442700            | 5.40855600  | -0.38661300 |
| C -2.65299300                                              | 3.97656900  | 0.71581900  | C -3.11757100            | 3.76991900  | 0.99983000  |
| H -2.87627100                                              | 4.66779900  | 1.52136200  | H -3.46665800            | 4.35695600  | 1.84264300  |
| C -2.42728700                                              | 2.63457900  | 1.00273200  | C -2.82032800            | 2.42234000  | 1.17506300  |
| H -2.48534800                                              | 2.30218000  | 2.03267600  | H -2.95094900            | 1.98057800  | 2.15640700  |
| C 3.47654300                                               | -0.80121500 | -0.15672200 | C 3.58688300             | -0.76523600 | -0.07938600 |
| C 4.67685300                                               | -0.18996400 | 0.21270000  | C 4.76285600             | -0.29435500 | 0.51244600  |
| H 4.66538400                                               | 0.77109200  | 0.71619000  | H 4.74580000             | 0.60915200  | 1.11359200  |
| C 5.89139800                                               | -0.79395200 | -0.07923600 | C 5.96278200             | -0.96450100 | 0.32278300  |
| H 6.81825300                                               | -0.30887600 | 0.20773600  | H 6.87006000             | -0.59048800 | 0.78517900  |
| C 5.92019700                                               | -2.01487300 | -0.74616600 | C 6.00213900             | -2.11301000 | -0.46291700 |
| H 6.87020700                                               | -2.48473700 | -0.97664800 | H 6.94097500             | -2.63542100 | -0.61184500 |
| C 4.73147600                                               | -2.62471300 | -1.12186400 | C 4.83896200             | -2.58834000 | -1.05172100 |
| H 4.74637800                                               | -3.57219400 | -1.64921600 | H 4.86269900             | -3.48516400 | -1.66095300 |
| C 3.51206200                                               | -2.02022400 | -0.83306800 | C 3.63324000             | -1.91996700 | -0.85964600 |
| H 2.58277400                                               | -2.49485100 | -1.13682600 | H 2.71605500             | -2.30419900 | -1.29764400 |
| C 2.13532100                                               | 1.73024500  | -0.01916900 | C 2.28058900             | 1.80892500  | -0.17232400 |
| C 2.42693600                                               | 2.63527700  | 1.00129200  | C 1.44967900             | 2.79646000  | 0.36341000  |
| H 2.48520400                                               | 2.30328300  | 2.03135700  | H 0.63146000             | 2.52256100  | 1.02024700  |
| C 2.65232800                                               | 3.97720400  | 0.71383200  | C 1.64041400             | 4.13386700  | 0.04773300  |
| H 2.87557600                                               | 4.66878900  | 1.51907900  | H 0.98908200             | 4.88438500  | 0.48170700  |
| C 2.59728500                                               | 4.42948400  | -0.59699300 | C 2.64879000             | 4.50828700  | -0.83292800 |
| H 2.77582300                                               | 5.47537500  | -0.82044300 | H 2.79398000             | 5.55287200  | -1.08490200 |
| C 2.30786200                                               | 3.53521400  | -1.62149600 | C 3.46130300             | 3.53285100  | -1.39507800 |
| H 2.25867600                                               | 3.88140000  | -2.64800800 | H 4.24395600             | 3.81170600  | -2.09237500 |
| C 2.07088200                                               | 2.19965000  | -1.33346800 | C 3.27966400             | 2.19440800  | -1.06860300 |
| H 1.83167100                                               | 1.50995500  | -2.13670000 | H 3.92692000             | 1.44632300  | -1.51088100 |
| Cl 0.00030000                                              | -3.29355300 | -1.37770300 | Cl 0.13442100            | -3.14001500 | -1.23182300 |
| Co 0.00010800                                              | -1.29493900 | -0.33085800 | Co 0.04150100            | -1.06611400 | -0.24708900 |
| N 0.00033100                                               | -1.99899300 | 1.75020500  | N 0.10694200             | -1.84324200 | 1.55265100  |
| H 0.00073900                                               | -2.99592400 | 1.56809200  | H 0.25575200             | -2.80240800 | 1.24098800  |
| P -1.82024900                                              | -0.06929400 | 0.24267100  | P -1.92468600            | -0.14086000 | 0.23340600  |
| P 1.82029000                                               | -0.06899100 | 0.24236700  | P 1.92993300             | 0.02871300  | 0.17860100  |
| <p>Square planar</p> <p><b>3-Square-Planar-singlet</b></p> |             |             | <p><b>10-singlet</b></p> |             |             |
| C -1.76103000                                              | -0.25142300 | 2.10147100  | C -2.41207500            | -0.10118900 | 2.35005800  |
| H -1.08463200                                              | 0.51349500  | 2.48939300  | H -3.35963900            | 0.36238000  | 2.63319000  |
| H -2.74191400                                              | -0.09403400 | 2.55748300  | H -2.38421700            | -1.13152300 | 2.71226100  |
| C -1.25217000                                              | -1.64916100 | 2.44398700  | C -1.19931100            | 0.64862000  | 2.87891500  |
| H -1.13406100                                              | -1.74498500 | 3.53239000  | H -1.36250000            | 1.73580800  | 2.76086000  |
| H -2.00388300                                              | -2.38039900 | 2.13656100  | H -1.11382800            | 0.47653100  | 3.96439000  |
| C 1.25241300                                               | -1.64814600 | 2.44426600  | C 1.17904700             | 0.69028100  | 2.88438800  |
| H 2.00462100                                               | -2.37917000 | 2.13754300  | H 1.10019800             | 0.50061900  | 3.96780200  |
| H 1.13392100                                               | -1.74344900 | 3.53267000  | H 1.29040600             | 1.78612100  | 2.78277400  |
|                                                            |             |             | C 2.42245900             | 0.00153700  | 2.34621300  |

|    |             |             |             |    |             |             |             |
|----|-------------|-------------|-------------|----|-------------|-------------|-------------|
| C  | 1.76076900  | -0.25033700 | 2.10122100  | H  | 2.46552900  | -1.02877000 | 2.70736800  |
| H  | 2.74148700  | -0.09236500 | 2.55739500  | H  | 3.35587700  | 0.49539600  | 2.62392300  |
| H  | 1.08397900  | 0.51450000  | 2.48861800  | C  | -3.37639100 | -1.36373900 | -0.14635000 |
| C  | -3.47631200 | -0.80162600 | -0.15704500 | C  | -3.47301500 | -1.51312500 | -1.53245100 |
| C  | -3.51153000 | -2.02033200 | -0.83394600 | H  | -2.84922800 | -0.91448100 | -2.18672000 |
| H  | -2.58212400 | -2.49471400 | -1.13772000 | C  | -4.36054000 | -2.42512500 | -2.08344300 |
| C  | -4.73080500 | -2.62486800 | -1.12324100 | H  | -4.42166600 | -2.53009600 | -3.16092200 |
| H  | -4.74546300 | -3.57211300 | -1.65102400 | C  | -5.16206000 | -3.20675800 | -1.25888800 |
| C  | -5.91968400 | -2.01537900 | -0.74748200 | H  | -5.85348100 | -3.92204600 | -1.69020200 |
| H  | -6.86958300 | -2.48527800 | -0.97835100 | C  | -5.07091300 | -3.06826500 | 0.11890500  |
| C  | -5.89118500 | -0.79476400 | -0.07997700 | H  | -5.69256300 | -3.67355100 | 0.76960100  |
| H  | -6.81816100 | -0.30995900 | 0.20706000  | C  | -4.18308800 | -2.15272400 | 0.67299000  |
| C  | -4.67678300 | -0.19072900 | 0.21245100  | H  | -4.12949000 | -2.05851100 | 1.75081100  |
| H  | -4.66555200 | 0.77009400  | 0.71638800  | C  | -2.80558400 | 1.45894900  | -0.07790100 |
| C  | -2.13564900 | 1.72999300  | -0.01812000 | C  | -1.89462300 | 2.44264700  | -0.45768800 |
| C  | -2.07148900 | 2.19992100  | -1.33224600 | H  | -0.83387800 | 2.21238000  | -0.43137100 |
| H  | -1.83225000 | 1.51058500  | -2.13577600 | C  | -2.34260800 | 3.69290200  | -0.86821000 |
| C  | -2.30877200 | 3.53554800  | -1.61972600 | H  | -1.62575100 | 4.45132100  | -1.16311500 |
| H  | -2.25979600 | 3.88213900  | -2.64611200 | C  | -3.70335800 | 3.96622100  | -0.90659000 |
| C  | -2.59823300 | 4.42936500  | -0.59484000 | H  | -4.05387800 | 4.93984800  | -1.23134100 |
| H  | -2.77702100 | 5.47530500  | -0.81786100 | C  | -4.61807400 | 2.98716200  | -0.53274100 |
| C  | -2.65299300 | 3.97656900  | 0.71581900  | H  | -5.68191000 | 3.19573400  | -0.56674200 |
| H  | -2.87627100 | 4.66779900  | 1.52136200  | C  | -4.17248400 | 1.73925300  | -0.12016500 |
| C  | -2.42728700 | 2.63457900  | 1.00273200  | H  | -4.89235300 | 0.97679300  | 0.15785700  |
| H  | -2.48534800 | 2.30218000  | 2.03267600  | C  | 3.35861100  | -1.44426700 | -0.01157000 |
| C  | 3.47654300  | -0.80121500 | -0.15672200 | C  | 4.68572300  | -1.15778500 | -0.33164300 |
| C  | 4.67685300  | -0.18996400 | 0.21270000  | H  | 5.03623900  | -0.13177000 | -0.32433500 |
| H  | 4.66538400  | 0.77109200  | 0.71619000  | C  | 5.56024600  | -2.18154300 | -0.67213900 |
| C  | 5.89139800  | -0.79395200 | -0.07923600 | H  | 6.58938200  | -1.94882800 | -0.92317600 |
| H  | 6.81825300  | -0.30887600 | 0.20773600  | C  | 5.11785900  | -3.49882500 | -0.69639000 |
| C  | 5.92019700  | -2.01487300 | -0.74616600 | H  | 5.80138900  | -4.29643600 | -0.96593700 |
| H  | 6.87020700  | -2.48473700 | -0.97664800 | C  | 3.79657800  | -3.79040900 | -0.38158400 |
| C  | 4.73147600  | -2.62471300 | -1.12186400 | H  | 3.44342100  | -4.81532200 | -0.40851700 |
| H  | 4.74637800  | -3.57219400 | -1.64921600 | C  | 2.91923000  | -2.76782800 | -0.04509100 |
| C  | 3.51206200  | -2.02022400 | -0.83306800 | H  | 1.88229600  | -2.99018600 | 0.18491000  |
| H  | 2.58277400  | -2.49485100 | -1.13682600 | C  | 2.82102600  | 1.39116400  | -0.24808600 |
| C  | 2.13532100  | 1.73024500  | -0.01916900 | C  | 3.48403500  | 2.38748100  | 0.46733600  |
| C  | 2.42693600  | 2.63527700  | 1.00129200  | H  | 3.65857100  | 2.27661300  | 1.53044700  |
| H  | 2.48520400  | 2.30328300  | 2.03135700  | C  | 3.92927100  | 3.54001300  | -0.17225800 |
| C  | 2.65232800  | 3.97720400  | 0.71383200  | H  | 4.43923500  | 4.30757400  | 0.39962700  |
| H  | 2.87557600  | 4.66878900  | 1.51907900  | C  | 3.72510400  | 3.70580600  | -1.53447600 |
| C  | 2.59728500  | 4.42948400  | -0.59699300 | H  | 4.07591600  | 4.60257700  | -2.03302400 |
| H  | 2.77582300  | 5.47537500  | -0.82044300 | C  | 3.06589800  | 2.71657700  | -2.25706800 |
| C  | 2.30786200  | 3.53521400  | -1.62149600 | H  | 2.89927300  | 2.83939600  | -3.32155700 |
| H  | 2.25867600  | 3.88140000  | -2.64800800 | C  | 2.60782300  | 1.57458800  | -1.61786200 |
| C  | 2.07088200  | 2.19965000  | -1.33346800 | H  | 2.07989600  | 0.81736600  | -2.18722900 |
| H  | 1.83167100  | 1.50995500  | -2.13670000 | C  | 0.01899500  | -1.04788500 | -1.17830200 |
| Cl | 0.00030000  | -3.29355300 | -1.37770300 | Co | 0.00887300  | -0.40048500 | 0.40804400  |
| Co | 0.00010800  | -1.29493900 | -0.33085800 | N  | -0.00016200 | 0.19206100  | 2.20169900  |
| N  | 0.00033100  | -1.99899300 | 1.75020500  | O  | 0.03187600  | -1.47008800 | -2.25837400 |
| H  | 0.00073900  | -2.99592400 | 1.56809200  | P  | -2.15502600 | -0.16155600 | 0.52442800  |
| P  | -1.82024900 | -0.06929400 | 0.24267100  | P  | 2.16413300  | -0.14830700 | 0.52616000  |
| P  | 1.82029000  | -0.06899100 | 0.24236700  |    |             |             |             |



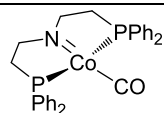

**10-triplet**

|   |             |             |             |
|---|-------------|-------------|-------------|
| C | -2.43709200 | -0.23707700 | 2.18343600  |
| H | -3.32528700 | 0.31163700  | 2.50533600  |
| H | -2.56110700 | -1.29330800 | 2.43727300  |
| C | -1.17384400 | 0.31360700  | 2.83748100  |
| H | -1.23672500 | 1.41807300  | 2.86996500  |
| H | -1.16368700 | -0.00815700 | 3.89463500  |
| C | 1.20727100  | 0.29882000  | 2.82562300  |
| H | 1.20688300  | -0.02727500 | 3.88173700  |
| H | 1.27950600  | 1.40305200  | 2.86135700  |
| C | 2.45211900  | -0.26441400 | 2.15038700  |
| H | 2.56100900  | -1.32525700 | 2.39045800  |
| H | 3.36901000  | 0.23813000  | 2.46707200  |
| C | -3.62840400 | -1.14420500 | -0.33727000 |
| C | -3.48906800 | -1.70570300 | -1.60775800 |
| H | -2.55839900 | -1.57461600 | -2.15014200 |
| C | -4.52227100 | -2.43824000 | -2.17602900 |
| H | -4.39838500 | -2.86820800 | -3.16375400 |
| C | -5.70490100 | -2.63360300 | -1.47315700 |
| H | -6.50910200 | -3.21402300 | -1.91157200 |
| C | -5.85059500 | -2.08932000 | -0.20344700 |
| H | -6.76939100 | -2.24285800 | 0.35202500  |
| C | -4.82047900 | -1.34622200 | 0.36024100  |
| H | -4.95224600 | -0.92447200 | 1.34991300  |
| C | -2.59652000 | 1.55669200  | -0.10938000 |
| C | -1.59038700 | 2.50976800  | 0.06730600  |
| H | -0.61783100 | 2.19447500  | 0.43135000  |
| C | -1.82549400 | 3.84576000  | -0.22819200 |
| H | -1.03530300 | 4.57401100  | -0.08269900 |
| C | -3.06213500 | 4.24472300  | -0.72112000 |
| H | -3.24350700 | 5.28695900  | -0.95979900 |
| C | -4.06286700 | 3.30070300  | -0.91388300 |
| H | -5.02827400 | 3.60349900  | -1.30494500 |
| C | -3.83426600 | 1.96463400  | -0.60769400 |
| H | -4.62259800 | 1.23756500  | -0.76390300 |
| C | 3.66435800  | -1.18390500 | -0.31144500 |
| C | 4.78715200  | -0.58225200 | -0.87950800 |
| H | 4.83461000  | 0.49611500  | -0.97459400 |
| C | 5.84971400  | -1.35733500 | -1.32930100 |
| H | 6.71524600  | -0.87514600 | -1.77074900 |
| C | 5.80637100  | -2.74034900 | -1.21405400 |
| H | 6.63632100  | -3.34327000 | -1.56545200 |
| C | 4.68975500  | -3.34845200 | -0.65215700 |
| H | 4.64243200  | -4.42841700 | -0.56587600 |
| C | 3.62319500  | -2.57712400 | -0.21275500 |
| H | 2.74695000  | -3.06357200 | 0.20204700  |
| C | 2.56750500  | 1.49443200  | -0.22404000 |
| C | 3.28376600  | 2.41192000  | 0.54520900  |
| H | 3.67528100  | 2.12580400  | 1.51406600  |

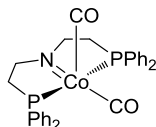

**10a-singlet**

|   |             |             |             |
|---|-------------|-------------|-------------|
| C | -2.46962300 | -0.39826000 | 2.23731000  |
| H | -3.39184700 | 0.11033800  | 2.52536700  |
| H | -2.58184800 | -1.46798000 | 2.42235600  |
| C | -1.24943400 | 0.14884900  | 2.95259300  |
| H | -1.27870200 | 1.25706500  | 2.88401800  |
| H | -1.32446600 | -0.08252900 | 4.02897500  |
| C | 1.08739500  | 0.36411500  | 2.91376200  |
| H | 1.18527300  | 0.21177500  | 4.00279800  |
| H | 0.94077900  | 1.45808400  | 2.78246500  |
| C | 2.38373600  | -0.04246700 | 2.24145900  |
| H | 2.64578300  | -1.07076900 | 2.50143600  |
| H | 3.22929500  | 0.59935500  | 2.49934000  |
| C | -3.36183500 | -1.07553500 | -0.49896300 |
| C | -3.95141500 | -0.52850000 | -1.63910700 |
| H | -3.69857100 | 0.47857600  | -1.94919300 |
| C | -4.86873800 | -1.26245800 | -2.38096900 |
| H | -5.31805600 | -0.82183600 | -3.26419600 |
| C | -5.20794100 | -2.55251900 | -1.99623800 |
| H | -5.92522800 | -3.12385300 | -2.57477000 |
| C | -4.61675800 | -3.11035300 | -0.86887000 |
| H | -4.86931700 | -4.12006800 | -0.56444600 |
| C | -3.69461000 | -2.38174000 | -0.13111100 |
| H | -3.22744100 | -2.84181300 | 0.73226700  |
| C | -2.46839300 | 1.60131000  | 0.13677600  |
| C | -1.47823400 | 2.44970700  | -0.34936500 |
| H | -0.49101200 | 2.04925100  | -0.55076100 |
| C | -1.74748600 | 3.79750700  | -0.56317200 |
| H | -0.96612800 | 4.44707600  | -0.94108300 |
| C | -3.00889500 | 4.30615600  | -0.28832500 |
| H | -3.21988200 | 5.35720300  | -0.45265200 |
| C | -4.00432000 | 3.46536200  | 0.20037200  |
| H | -4.99142100 | 3.85929800  | 0.41660900  |
| C | -3.73639100 | 2.12091100  | 0.41155200  |
| H | -4.52273900 | 1.47177900  | 0.78193100  |
| C | 3.44624500  | -1.02794700 | -0.28401300 |
| C | 4.70206400  | -0.44244800 | -0.45911500 |
| H | 4.84581000  | 0.60894500  | -0.23681900 |
| C | 5.77011400  | -1.19569700 | -0.92639800 |
| H | 6.74023200  | -0.72906800 | -1.05833100 |
| C | 5.59685200  | -2.54168600 | -1.22821600 |
| H | 6.43125300  | -3.12812800 | -1.59673300 |
| C | 4.35124500  | -3.13077100 | -1.05913200 |
| H | 4.20669400  | -4.17883200 | -1.29682300 |
| C | 3.28162700  | -2.37745400 | -0.59061000 |
| H | 2.30955500  | -2.83866700 | -0.46191600 |
| C | 2.36978500  | 1.61926700  | -0.21611800 |
| C | 2.64832400  | 2.70803000  | 0.60870500  |

|                                                                                                            |             |             |             |                                                                                                            |             |             |             |
|------------------------------------------------------------------------------------------------------------|-------------|-------------|-------------|------------------------------------------------------------------------------------------------------------|-------------|-------------|-------------|
| C                                                                                                          | 3.50794100  | 3.70245100  | 0.07960700  | H                                                                                                          | 2.69644500  | 2.58278200  | 1.68353900  |
| H                                                                                                          | 4.06334900  | 4.40522400  | 0.69116000  | C                                                                                                          | 2.86270600  | 3.97070900  | 0.06570500  |
| C                                                                                                          | 3.02664100  | 4.09006700  | -1.16416800 | H                                                                                                          | 3.07901300  | 4.80619500  | 0.72258300  |
| H                                                                                                          | 3.20496800  | 5.09614800  | -1.52738600 | C                                                                                                          | 2.80359300  | 4.16127400  | -1.30754100 |
| C                                                                                                          | 2.31153700  | 3.18442200  | -1.93899100 | H                                                                                                          | 2.97540400  | 5.14502700  | -1.72999400 |
| H                                                                                                          | 1.92648800  | 3.48110900  | -2.90824000 | C                                                                                                          | 2.52230100  | 3.08195300  | -2.13917800 |
| C                                                                                                          | 2.07634000  | 1.90052400  | -1.46731300 | H                                                                                                          | 2.47297100  | 3.22042000  | -3.21363900 |
| H                                                                                                          | 1.50099400  | 1.20391500  | -2.06867400 | C                                                                                                          | 2.30002900  | 1.82481400  | -1.59784800 |
| C                                                                                                          | -0.08539600 | -2.68690400 | 0.00370700  | H                                                                                                          | 2.07933400  | 0.99226000  | -2.25797000 |
| Co                                                                                                         | -0.00933000 | -0.92186300 | 0.38537400  | Co                                                                                                         | -0.00294200 | -0.93676300 | 0.45066600  |
| N                                                                                                          | 0.01096200  | -0.12787500 | 2.14505800  | N                                                                                                          | -0.02771800 | -0.39531900 | 2.40071200  |
| O                                                                                                          | -0.15183000 | -3.82816800 | -0.12762500 | P                                                                                                          | -2.06335100 | -0.17199300 | 0.44689000  |
| P                                                                                                          | -2.20681600 | -0.19210700 | 0.34036000  | P                                                                                                          | 2.02866300  | -0.07845900 | 0.42847300  |
| P                                                                                                          | 2.20874400  | -0.23301700 | 0.31176600  | C                                                                                                          | -0.01122400 | -2.62866800 | 1.09376000  |
| 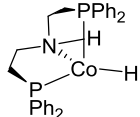 <p><b>3B-triplet</b></p> |             |             |             |  <p><b>3B-singlet</b></p> |             |             |             |
| C                                                                                                          | -1.79340800 | -0.62526200 | 1.98892900  | C                                                                                                          | -1.59079900 | -0.62929200 | 1.89039600  |
| H                                                                                                          | -1.14703500 | 0.11623600  | 2.46450000  | H                                                                                                          | -0.91893500 | 0.13094200  | 2.29370000  |
| H                                                                                                          | -2.78864400 | -0.53561300 | 2.43226400  | H                                                                                                          | -2.55920600 | -0.51123300 | 2.38812900  |
| C                                                                                                          | -1.25636000 | -2.03457300 | 2.21419200  | C                                                                                                          | -1.04760900 | -2.02598600 | 2.19117000  |
| H                                                                                                          | -1.15741500 | -2.22718300 | 3.29212900  | H                                                                                                          | -0.95299500 | -2.16291200 | 3.27791400  |
| H                                                                                                          | -1.98213300 | -2.75207700 | 1.82334900  | H                                                                                                          | -1.76275300 | -2.76442800 | 1.82377200  |
| C                                                                                                          | 1.24644400  | -1.94421500 | 2.25646500  | C                                                                                                          | 1.47044300  | -2.02423200 | 2.31806500  |
| H                                                                                                          | 2.02135800  | -2.64457100 | 1.93500700  | H                                                                                                          | 2.24027500  | -2.72589700 | 1.98752700  |
| H                                                                                                          | 1.10559500  | -2.09153100 | 3.33652200  | H                                                                                                          | 1.29809100  | -2.20362300 | 3.38793700  |
| C                                                                                                          | 1.73515800  | -0.52367300 | 1.98869300  | C                                                                                                          | 1.97163900  | -0.60587300 | 2.08727500  |
| H                                                                                                          | 2.71146400  | -0.37527600 | 2.45805200  | H                                                                                                          | 2.99368100  | -0.50457500 | 2.45978200  |
| H                                                                                                          | 1.04413500  | 0.20951200  | 2.41090400  | H                                                                                                          | 1.34973400  | 0.12737200  | 2.60716800  |
| C                                                                                                          | -3.44963000 | -0.98711800 | -0.34963800 | C                                                                                                          | -3.42321100 | -1.01399000 | -0.32694500 |
| C                                                                                                          | -3.43827200 | -2.14122900 | -1.13149100 | C                                                                                                          | -3.56029100 | -2.11674000 | -1.16719700 |
| H                                                                                                          | -2.48125400 | -2.55388000 | -1.44550400 | H                                                                                                          | -2.66385600 | -2.56386900 | -1.58344600 |
| C                                                                                                          | -4.63314300 | -2.74589900 | -1.50784500 | C                                                                                                          | -4.81739400 | -2.63841500 | -1.45341200 |
| H                                                                                                          | -4.61232600 | -3.64239300 | -2.11820200 | H                                                                                                          | -4.90726200 | -3.49556600 | -2.11243900 |
| C                                                                                                          | -5.84646800 | -2.19945400 | -1.11216700 | C                                                                                                          | -5.95386700 | -2.06311400 | -0.90062400 |
| H                                                                                                          | -6.77834800 | -2.66812500 | -1.40971200 | H                                                                                                          | -6.93497400 | -2.46829800 | -1.12411500 |
| C                                                                                                          | -5.86507900 | -1.04248500 | -0.33941000 | C                                                                                                          | -5.82887800 | -0.96042600 | -0.06209700 |
| H                                                                                                          | -6.81113200 | -0.60642400 | -0.03652300 | H                                                                                                          | -6.71283200 | -0.50164700 | 0.36845400  |
| C                                                                                                          | -4.67364900 | -0.43921100 | 0.03881200  | C                                                                                                          | -4.57332900 | -0.43859300 | 0.21872900  |
| H                                                                                                          | -4.69939400 | 0.47334400  | 0.62529100  | H                                                                                                          | -4.49045600 | 0.43558100  | 0.85635500  |
| C                                                                                                          | -2.16339800 | 1.54192600  | 0.06802800  | C                                                                                                          | -2.10421400 | 1.46966500  | -0.06482500 |
| C                                                                                                          | -2.03551100 | 2.15323400  | -1.18181000 | C                                                                                                          | -2.42081900 | 1.97781000  | -1.33008600 |
| H                                                                                                          | -1.73305900 | 1.55887200  | -2.03806000 | H                                                                                                          | -2.46583700 | 1.30018600  | -2.17772700 |
| C                                                                                                          | -2.28491800 | 3.50847600  | -1.33813200 | C                                                                                                          | -2.68218300 | 3.32548500  | -1.51761400 |
| H                                                                                                          | -2.18402700 | 3.96505100  | -2.31661900 | H                                                                                                          | -2.93739000 | 3.69206900  | -2.50638900 |
| C                                                                                                          | -2.65113100 | 4.28189200  | -0.24234800 | C                                                                                                          | -2.61213900 | 4.20766400  | -0.44284600 |
| H                                                                                                          | -2.83907000 | 5.34308700  | -0.36206800 | H                                                                                                          | -2.80896200 | 5.26416900  | -0.58778900 |
|                                                                                                            |             |             |             | C                                                                                                          | -2.28596700 | 3.72215600  | 0.81455500  |

|                                                                                                                  |             |             |             |                                                                                                                          |             |             |             |
|------------------------------------------------------------------------------------------------------------------|-------------|-------------|-------------|--------------------------------------------------------------------------------------------------------------------------|-------------|-------------|-------------|
| C                                                                                                                | -2.76995900 | 3.68885000  | 1.00686300  | H                                                                                                                        | -2.22819200 | 4.39937200  | 1.66031000  |
| H                                                                                                                | -3.05329200 | 4.28537400  | 1.86748300  | C                                                                                                                        | -2.03855000 | 2.36523900  | 1.00314800  |
| C                                                                                                                | -2.53163700 | 2.32737300  | 1.16082500  | H                                                                                                                        | -1.80193800 | 2.01630700  | 2.00103700  |
| H                                                                                                                | -2.63994400 | 1.88475800  | 2.14431000  | C                                                                                                                        | 3.38315800  | -0.95027000 | -0.46434300 |
| C                                                                                                                | 3.43661100  | -0.99742000 | -0.29124200 | C                                                                                                                        | 4.60950100  | -0.28608900 | -0.46890200 |
| C                                                                                                                | 4.65357300  | -0.46084400 | 0.13374300  | H                                                                                                                        | 4.68447800  | 0.71804300  | -0.06694200 |
| H                                                                                                                | 4.67037900  | 0.46040000  | 0.70711900  | C                                                                                                                        | 5.73702600  | -0.89627200 | -1.00482900 |
| C                                                                                                                | 5.84892400  | -1.08676500 | -0.19108600 | H                                                                                                                        | 6.68528700  | -0.36947100 | -1.00416100 |
| H                                                                                                                | 6.78971900  | -0.65990700 | 0.13991400  | C                                                                                                                        | 5.65092800  | -2.17256100 | -1.54847100 |
| C                                                                                                                | 5.84124700  | -2.25546800 | -0.94642400 | H                                                                                                                        | 6.53198000  | -2.64464500 | -1.96933200 |
| H                                                                                                                | 6.77632300  | -2.74202200 | -1.20223600 | C                                                                                                                        | 4.43057400  | -2.83710800 | -1.55954400 |
| C                                                                                                                | 4.63541200  | -2.79124700 | -1.37789800 | H                                                                                                                        | 4.35305300  | -3.82755200 | -1.99478000 |
| H                                                                                                                | 4.62387700  | -3.69712300 | -1.97444200 | C                                                                                                                        | 3.30359100  | -2.22773800 | -1.02321900 |
| C                                                                                                                | 3.43666000  | -2.16385100 | -1.05445300 | H                                                                                                                        | 2.33996300  | -2.73447600 | -1.02947200 |
| H                                                                                                                | 2.48619400  | -2.56949400 | -1.39597500 | C                                                                                                                        | 2.09854400  | 1.56590200  | 0.14617300  |
| C                                                                                                                | 2.16947600  | 1.55535200  | -0.02276000 | C                                                                                                                        | 2.80420700  | 2.30646400  | 1.09610700  |
| C                                                                                                                | 2.38992300  | 2.41831100  | 1.05048000  | H                                                                                                                        | 3.22670000  | 1.82009600  | 1.96836600  |
| H                                                                                                                | 2.36684300  | 2.04732100  | 2.06842500  | C                                                                                                                        | 2.97428100  | 3.67688800  | 0.93849300  |
| C                                                                                                                | 2.64769400  | 3.76783200  | 0.83333400  | H                                                                                                                        | 3.52100900  | 4.24161600  | 1.68607200  |
| H                                                                                                                | 2.81495000  | 4.42523100  | 1.67981300  | C                                                                                                                        | 2.44587800  | 4.32098900  | -0.17307800 |
| C                                                                                                                | 2.69587700  | 4.27128900  | -0.45878600 | H                                                                                                                        | 2.57805800  | 5.39039100  | -0.29531500 |
| H                                                                                                                | 2.89929000  | 5.32296600  | -0.62710800 | C                                                                                                                        | 1.73851800  | 3.59261800  | -1.12162400 |
| C                                                                                                                | 2.47802700  | 3.41943300  | -1.53619800 | H                                                                                                                        | 1.31009300  | 4.09198900  | -1.98326000 |
| H                                                                                                                | 2.51053100  | 3.80482100  | -2.54945400 | C                                                                                                                        | 1.56048600  | 2.22583700  | -0.95876900 |
| C                                                                                                                | 2.20965300  | 2.07661200  | -1.31908600 | H                                                                                                                        | 0.97975200  | 1.66104100  | -1.68094300 |
| H                                                                                                                | 2.02875400  | 1.42095700  | -2.16507400 | Co                                                                                                                       | 0.06728900  | -1.46637200 | -0.25866500 |
| Co                                                                                                               | -0.00078600 | -1.45066600 | -0.54391500 | N                                                                                                                        | 0.25179400  | -2.33829400 | 1.53346800  |
| N                                                                                                                | 0.01718200  | -2.28697600 | 1.51923100  | H                                                                                                                        | 0.25357700  | -3.33457100 | 1.35324100  |
| H                                                                                                                | 0.05484900  | -3.26362000 | 1.25984000  | P                                                                                                                        | -1.71469500 | -0.34949700 | 0.02327800  |
| P                                                                                                                | -1.81046300 | -0.26948600 | 0.15376000  | P                                                                                                                        | 1.81960000  | -0.25514300 | 0.25447500  |
| P                                                                                                                | 1.79356200  | -0.24522500 | 0.14260000  | H                                                                                                                        | -0.79024400 | -2.66683200 | -0.61439400 |
| H                                                                                                                | -0.03541700 | -2.82241700 | -1.43577900 |                                                                                                                          |             |             |             |
| 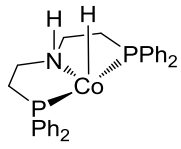 <p><i>mer-3B</i>-triplet</p> |             |             |             |  <p><i>mer-TS(3B/3A1)</i>-triplet</p> |             |             |             |
| P                                                                                                                | 0.21451500  | 0.33223200  | 2.20706200  | P                                                                                                                        | -2.19135500 | -0.24054800 | 0.32121200  |
| P                                                                                                                | 0.18409800  | 0.26387200  | -2.17846000 | P                                                                                                                        | 2.23308000  | -0.25104700 | 0.29748500  |
| C                                                                                                                | 0.34645500  | 2.18861700  | 2.41806300  | C                                                                                                                        | -2.40389300 | -0.27851200 | 2.17401800  |
| C                                                                                                                | 0.17103800  | 2.11605400  | -2.45065100 | C                                                                                                                        | 2.46729800  | -0.36318600 | 2.14669900  |
| H                                                                                                                | 1.41612300  | 2.41407100  | 2.43953700  | H                                                                                                                        | -2.51382500 | -1.34052200 | 2.40960500  |
| H                                                                                                                | 1.22185700  | 2.39390800  | -2.57011000 | H                                                                                                                        | 2.53590600  | -1.43041000 | 2.37264000  |
| H                                                                                                                | -0.07824200 | 2.53993600  | 3.36045500  | H                                                                                                                        | -3.32052000 | 0.22265000  | 2.49540800  |
| H                                                                                                                | -0.34011700 | 2.40339300  | -3.37235900 | H                                                                                                                        | 3.39913900  | 0.10610400  | 2.46925600  |
| C                                                                                                                | -0.31890100 | 2.87525500  | 1.23163400  | C                                                                                                                        | -1.16043400 | 0.27894400  | 2.86749100  |
| C                                                                                                                | -0.42229800 | 2.82453200  | -1.23796900 | C                                                                                                                        | 1.25396000  | 0.24423800  | 2.84785400  |
| H                                                                                                                | -0.20051700 | 3.96678700  | 1.31135100  | H                                                                                                                        | -1.24354100 | 0.05201000  | 3.94654600  |
| H                                                                                                                | -0.33425400 | 3.91524500  | -1.36022900 | H                                                                                                                        | 1.34107500  | 0.02702300  | 3.92843900  |
| H                                                                                                                | -1.39358200 | 2.66597700  | 1.23379600  | H                                                                                                                        | -1.16416400 | 1.38464200  | 2.79581800  |
| H                                                                                                                | -1.48861800 | 2.59491500  | -1.14635700 | H                                                                                                                        | 1.30266700  | 1.34745300  | 2.75997700  |
| N                                                                                                                | 0.22954700  | 2.35356400  | -0.01852500 |                                                                                                                          |             |             |             |

|                                                                                     |             |             |             |                                                                                     |             |             |             |
|-------------------------------------------------------------------------------------|-------------|-------------|-------------|-------------------------------------------------------------------------------------|-------------|-------------|-------------|
| H                                                                                   | 2.20148700  | 0.35663000  | 0.00558300  | N                                                                                   | 0.03392400  | -0.27242700 | 2.28841100  |
| H                                                                                   | 1.22859100  | 2.53265200  | -0.06297000 | H                                                                                   | 0.02758900  | -2.22007000 | 0.91591300  |
| Co                                                                                  | 0.58953800  | 0.17383500  | 0.01132900  | H                                                                                   | 0.02482900  | -1.57222600 | 1.64342300  |
| C                                                                                   | 1.40564800  | -0.30756900 | 3.47043400  | Co                                                                                  | 0.01727100  | -0.61454900 | 0.20163700  |
| C                                                                                   | 1.04983900  | -0.68703600 | 4.76425600  | C                                                                                   | -3.49311700 | -1.41201700 | -0.26209800 |
| C                                                                                   | 2.73909900  | -0.42272200 | 3.06945300  | C                                                                                   | -4.85135500 | -1.09067500 | -0.26670900 |
| C                                                                                   | 2.01500000  | -1.15186600 | 5.65017400  | C                                                                                   | -3.09411300 | -2.68392200 | -0.67226000 |
| H                                                                                   | 0.01605100  | -0.63268000 | 5.08412000  | C                                                                                   | -5.79246000 | -2.02713000 | -0.67253900 |
| C                                                                                   | 3.70160700  | -0.87702300 | 3.96095200  | H                                                                                   | -5.17496100 | -0.10092700 | 0.03674600  |
| H                                                                                   | 2.99679000  | -0.16916200 | 2.04378800  | C                                                                                   | -4.03762900 | -3.62213400 | -1.07369300 |
| C                                                                                   | 3.34306400  | -1.24202600 | 5.25345500  | H                                                                                   | -2.03751400 | -2.93159400 | -0.67347100 |
| H                                                                                   | 1.72514900  | -1.44792200 | 6.65275500  | C                                                                                   | -5.38730600 | -3.29494200 | -1.07543800 |
| H                                                                                   | 4.73413400  | -0.96037200 | 3.63886200  | H                                                                                   | -6.84537100 | -1.76661100 | -0.67558100 |
| H                                                                                   | 4.09446000  | -1.60515400 | 5.94629600  | H                                                                                   | -3.71565900 | -4.60787100 | -1.39127100 |
| C                                                                                   | -1.44949600 | -0.05899600 | 2.92715200  | H                                                                                   | -6.12376700 | -4.02475200 | -1.39348500 |
| C                                                                                   | -2.17192600 | -1.08563600 | 2.31626400  | C                                                                                   | -2.84624500 | 1.39339200  | -0.23662900 |
| C                                                                                   | -2.03191500 | 0.61551300  | 4.00272600  | C                                                                                   | -2.94729900 | 1.62163700  | -1.61261700 |
| C                                                                                   | -3.43293700 | -1.44259500 | 2.77541400  | C                                                                                   | -3.18161100 | 2.42560300  | 0.63782300  |
| H                                                                                   | -1.73925900 | -1.59628500 | 1.46155800  | C                                                                                   | -3.39250200 | 2.84150000  | -2.09853700 |
| C                                                                                   | -3.29901000 | 0.26913000  | 4.45623700  | H                                                                                   | -2.68113000 | 0.83236300  | -2.30878500 |
| H                                                                                   | -1.49872600 | 1.41766900  | 4.50090100  | C                                                                                   | -3.61796500 | 3.65325100  | 0.15018500  |
| C                                                                                   | -4.00077300 | -0.76339500 | 3.84602700  | H                                                                                   | -3.09984900 | 2.28346300  | 1.70878800  |
| H                                                                                   | -3.97660500 | -2.24503000 | 2.28895900  | C                                                                                   | -3.72814000 | 3.86395900  | -1.21680600 |
| H                                                                                   | -3.73792700 | 0.80596800  | 5.29045400  | H                                                                                   | -3.47373400 | 2.99736400  | -3.16880800 |
| H                                                                                   | -4.98923700 | -1.03351400 | 4.20100300  | H                                                                                   | -3.87359600 | 4.44568200  | 0.84525100  |
| C                                                                                   | -1.40830400 | -0.32804900 | -2.91945200 | H                                                                                   | -4.07085400 | 4.82035800  | -1.59572100 |
| C                                                                                   | -1.61323400 | -1.71115900 | -2.97658700 | C                                                                                   | 3.52995500  | -1.38594000 | -0.36500100 |
| C                                                                                   | -2.44091100 | 0.51072400  | -3.33798900 | C                                                                                   | 4.58442900  | -0.96590900 | -1.17441700 |
| C                                                                                   | -2.80325400 | -2.23629000 | -3.45546600 | C                                                                                   | 3.39396900  | -2.75035300 | -0.08996300 |
| H                                                                                   | -0.82683900 | -2.38281800 | -2.64622200 | C                                                                                   | 5.49491100  | -1.88691800 | -1.68105200 |
| C                                                                                   | -3.64047600 | -0.01490500 | -3.80772200 | H                                                                                   | 4.69916000  | 0.08436500  | -1.41443400 |
| H                                                                                   | -2.32272400 | 1.58756100  | -3.30450300 | C                                                                                   | 4.30911800  | -3.66581400 | -0.58819400 |
| C                                                                                   | -3.82526100 | -1.38847400 | -3.87138200 | H                                                                                   | 2.55375800  | -3.09857100 | 0.50257200  |
| H                                                                                   | -2.93694700 | -3.31177200 | -3.50026300 | C                                                                                   | 5.36469200  | -3.23670600 | -1.38548500 |
| H                                                                                   | -4.43048500 | 0.65562200  | -4.12881600 | H                                                                                   | 6.30978500  | -1.54377700 | -2.30941000 |
| H                                                                                   | -4.75904400 | -1.79790800 | -4.24017500 | H                                                                                   | 4.19207400  | -4.71989500 | -0.36111800 |
| C                                                                                   | 1.41472000  | -0.30586200 | -3.43596400 | H                                                                                   | 6.07673100  | -3.95317000 | -1.77981400 |
| C                                                                                   | 2.68416900  | -0.66248100 | -2.98270400 | C                                                                                   | 2.83129900  | 1.43889700  | -0.13659700 |
| C                                                                                   | 1.13354900  | -0.35956500 | -4.80197300 | C                                                                                   | 3.99603300  | 1.99894700  | 0.39301900  |
| C                                                                                   | 3.66128600  | -1.06213800 | -3.88704500 | C                                                                                   | 2.06202000  | 2.19716400  | -1.01851400 |
| H                                                                                   | 2.88311000  | -0.61235000 | -1.91498300 | C                                                                                   | 4.38187300  | 3.28593200  | 0.04396500  |
| C                                                                                   | 2.11180100  | -0.76009200 | -5.70239500 | H                                                                                   | 4.61273000  | 1.42783400  | 1.07832800  |
| H                                                                                   | 0.14400800  | -0.10134700 | -5.16378400 | C                                                                                   | 2.44784100  | 3.48489100  | -1.37088800 |
| C                                                                                   | 3.37774600  | -1.11144600 | -5.24598900 | H                                                                                   | 1.14879100  | 1.77244200  | -1.42333900 |
| H                                                                                   | 4.64557800  | -1.34078800 | -3.52614100 | C                                                                                   | 3.60826400  | 4.03106600  | -0.83938600 |
| H                                                                                   | 1.88500300  | -0.80129000 | -6.76241200 | H                                                                                   | 5.28818000  | 3.70942200  | 0.46302600  |
| H                                                                                   | 4.13990700  | -1.42685700 | -5.95045600 | H                                                                                   | 1.83713100  | 4.06216400  | -2.05614600 |
|                                                                                     |             |             |             | H                                                                                   | 3.90971100  | 5.03722300  | -1.10926500 |
| 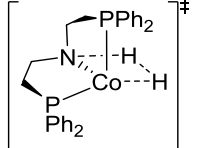 |             |             |             |  |             |             |             |
|                                                                                     |             |             |             | <b>3C-triplet</b>                                                                   |             |             |             |

| TS(3B/3A1)-triplet |             |             |             |
|--------------------|-------------|-------------|-------------|
| N                  | 0.02747700  | -2.32822100 | 1.46964200  |
| Co                 | -0.01645900 | -1.43678300 | -0.43897500 |
| P                  | -1.86780100 | -0.29199800 | 0.19220100  |
| P                  | 1.84503900  | -0.28132700 | 0.14514000  |
| H                  | 0.40568100  | -3.11154600 | -0.80979100 |
| H                  | 0.26161700  | -3.02475600 | 0.10482500  |
| C                  | -1.86318200 | -0.74898400 | 2.00001100  |
| H                  | -1.24492100 | -0.01195000 | 2.51982500  |
| H                  | -2.87221300 | -0.71211800 | 2.42234500  |
| C                  | -1.23901200 | -2.15858200 | 2.13084500  |
| H                  | -1.16713000 | -2.39923700 | 3.20407300  |
| H                  | -1.95775900 | -2.87711300 | 1.71362700  |
| C                  | 1.21669700  | -1.98585900 | 2.21101500  |
| H                  | 2.02620500  | -2.67464300 | 1.93059700  |
| H                  | 1.06304600  | -2.13098500 | 3.29185300  |
| C                  | 1.73956400  | -0.54998000 | 1.98429500  |
| H                  | 2.70560500  | -0.38621900 | 2.47219300  |
| H                  | 1.02507000  | 0.17841300  | 2.37721100  |
| C                  | -3.47476200 | -0.99595300 | -0.40535800 |
| C                  | -3.44456700 | -2.19671900 | -1.11452400 |
| H                  | -2.48973700 | -2.66733500 | -1.33016900 |
| C                  | -4.62171500 | -2.79392800 | -1.54922200 |
| H                  | -4.58098900 | -3.72909800 | -2.09680200 |
| C                  | -5.84392700 | -2.18783900 | -1.29145900 |
| H                  | -6.76342800 | -2.64782600 | -1.63629400 |
| C                  | -5.88419800 | -0.98494700 | -0.59523200 |
| H                  | -6.83581600 | -0.50336500 | -0.39765000 |
| C                  | -4.70830800 | -0.39346700 | -0.15388800 |
| H                  | -4.75185000 | 0.55026300  | 0.37848700  |
| C                  | -2.18661300 | 1.52228700  | 0.14417200  |
| C                  | -1.94000300 | 2.19376100  | -1.05474000 |
| H                  | -1.55152300 | 1.64266700  | -1.90489100 |
| C                  | -2.17334600 | 3.55686300  | -1.16371300 |
| H                  | -1.97729100 | 4.06361800  | -2.10208400 |
| C                  | -2.64299900 | 4.27329300  | -0.06906400 |
| H                  | -2.81821600 | 5.34026200  | -0.15101700 |
| C                  | -2.87906300 | 3.61855800  | 1.13226600  |
| H                  | -3.24074700 | 4.17229300  | 1.99195100  |
| C                  | -2.65549600 | 2.25046000  | 1.23833300  |
| H                  | -2.84960000 | 1.75401500  | 2.18205600  |
| C                  | 3.52227100  | -0.95563700 | -0.27274900 |
| C                  | 4.69977700  | -0.32633100 | 0.13661600  |
| H                  | 4.65174400  | 0.60678700  | 0.68782900  |
| C                  | 5.93624000  | -0.87650300 | -0.16993700 |
| H                  | 6.84358000  | -0.37674500 | 0.15197800  |
| C                  | 6.01283500  | -2.06302700 | -0.89204200 |
| H                  | 6.97973500  | -2.49140800 | -1.13251000 |
| C                  | 4.84796900  | -2.69378800 | -1.30625100 |
| H                  | 4.90008000  | -3.61760900 | -1.87211600 |
| C                  | 3.60914200  | -2.14071400 | -1.00064400 |
| H                  | 2.69742700  | -2.63254000 | -1.32318100 |
| C                  | -2.43644600 | -0.25262300 | 2.17448800  |
| H                  | -3.38784100 | 0.17898600  | 2.49387100  |
| H                  | -2.44080600 | -1.31396600 | 2.43342600  |
| C                  | -1.23587700 | 0.43007300  | 2.82720800  |
| H                  | -1.41403100 | 1.52163400  | 2.86398700  |
| H                  | -1.18922300 | 0.10363100  | 3.88212300  |
| C                  | 1.16398700  | 0.46244600  | 2.85260900  |
| H                  | 1.12025600  | 0.10235900  | 3.89693900  |
| H                  | 1.28268200  | 1.56061800  | 2.92967600  |
| C                  | 2.40612900  | -0.14256800 | 2.19645600  |
| H                  | 2.47797300  | -1.20074700 | 2.46034800  |
| H                  | 3.33508500  | 0.34202700  | 2.50866300  |
| C                  | -3.37815500 | -1.49081900 | -0.29369800 |
| C                  | -4.41338800 | -1.23819400 | -1.19276700 |
| H                  | -4.61037000 | -0.22454800 | -1.52083300 |
| C                  | -5.19976900 | -2.27864300 | -1.67557500 |
| H                  | -6.00149500 | -2.06378500 | -2.37392000 |
| C                  | -4.96404100 | -3.58401500 | -1.26736700 |
| H                  | -5.57984700 | -4.39362600 | -1.64291800 |
| C                  | -3.92652900 | -3.84766700 | -0.37955700 |
| H                  | -3.72763600 | -4.86537400 | -0.06150700 |
| C                  | -3.13573200 | -2.81194200 | 0.09534300  |
| H                  | -2.31030000 | -3.03369600 | 0.76490500  |
| C                  | -3.01644400 | 1.39904900  | -0.18208700 |
| C                  | -2.31817700 | 2.23781700  | -1.04975700 |
| H                  | -1.33958200 | 1.93428900  | -1.40722500 |
| C                  | -2.85753400 | 3.45573000  | -1.44620400 |
| H                  | -2.30151800 | 4.09775300  | -2.12041200 |
| C                  | -4.10132300 | 3.85125000  | -0.97262600 |
| H                  | -4.52222200 | 4.80325300  | -1.27697900 |
| C                  | -4.80492300 | 3.02511200  | -0.10305400 |
| H                  | -5.77575500 | 3.33106500  | 0.27144700  |
| C                  | -4.26599300 | 1.80745700  | 0.28955100  |
| H                  | -4.82879700 | 1.16953500  | 0.96241700  |
| C                  | 3.39621700  | -1.45611700 | -0.19434500 |
| C                  | 4.77956400  | -1.27209200 | -0.15945400 |
| H                  | 5.19048100  | -0.31655500 | 0.14810500  |
| C                  | 5.63484300  | -2.30072600 | -0.53031200 |
| H                  | 6.70805600  | -2.14608700 | -0.50182000 |
| C                  | 5.11847500  | -3.52597400 | -0.93823300 |
| H                  | 5.78818100  | -4.32780100 | -1.22920800 |
| C                  | 3.74370500  | -3.71808800 | -0.97594000 |
| H                  | 3.33512300  | -4.66990000 | -1.29738800 |
| C                  | 2.88777500  | -2.68666100 | -0.60785400 |
| H                  | 1.81222900  | -2.83066400 | -0.64057400 |
| C                  | 2.98454900  | 1.39230600  | -0.27901600 |
| C                  | 3.23390600  | 2.48897700  | 0.54558400  |
| H                  | 3.02131600  | 2.43294100  | 1.60641200  |
| C                  | 3.75129800  | 3.66746400  | 0.01868000  |
| H                  | 3.93982100  | 4.51031800  | 0.67478100  |
| C                  | 4.02665400  | 3.76589700  | -1.33797100 |
| H                  | 4.43269300  | 4.68420500  | -1.74735700 |

|                                                                                                                       |                                                                                                             |
|-----------------------------------------------------------------------------------------------------------------------|-------------------------------------------------------------------------------------------------------------|
| C 2.12905500 1.52919000 -0.07636500                                                                                   | C 3.77662900 2.67944400 -2.16979300                                                                         |
| C 2.24760100 2.43326700 0.97843000                                                                                    | H 3.98746800 2.74740400 -3.23156800                                                                         |
| H 2.18959600 2.08769300 2.00372800                                                                                    | C 3.25352000 1.50657400 -1.64617500                                                                         |
| C 2.44671300 3.78770400 0.73122900                                                                                    | H 3.05968500 0.66634500 -2.30520900                                                                         |
| H 2.53495900 4.47749600 1.56364500                                                                                    | Co -0.00665500 -0.28489000 0.25572400                                                                       |
| C 2.53724600 4.25490300 -0.57206800                                                                                   | N -0.02286800 0.09448300 2.12264500                                                                         |
| H 2.69588500 5.31038300 -0.76338100                                                                                   | P -2.22318300 -0.18736400 0.32637500                                                                        |
| C 2.42048800 3.36158700 -1.63169500                                                                                   | P 2.20055800 -0.15595400 0.34748700                                                                         |
| H 2.48822500 3.71817600 -2.65381000                                                                                   |                                                                                                             |
| C 2.21069700 2.01346700 -1.38489300                                                                                   |                                                                                                             |
| H 2.11163100 1.32448900 -2.21799500                                                                                   |                                                                                                             |
| 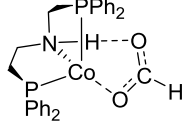 <p><b>3A1-triplet (favored)</b></p> |  <p><b>3A1-singlet</b></p> |
| H -0.00046700 -2.89744900 1.44152500                                                                                  | H -0.06661000 -2.99956700 1.39195500                                                                        |
| N -0.00020800 -1.89944500 1.69296200                                                                                  | N -0.17574500 -1.98900700 1.59746600                                                                        |
| Co -0.00010400 -1.16902700 -0.35687800                                                                                | Co -0.12433200 -1.24370700 -0.23816200                                                                      |
| O 0.00024000 -2.87651000 -1.36466300                                                                                  | O 0.51850900 -2.83646400 -1.08614200                                                                        |
| C 0.00009400 -4.05523600 -0.86652800                                                                                  | C 0.49161700 -4.04703400 -0.67712800                                                                        |
| H 0.00041700 -4.86317400 -1.62566200                                                                                  | H 0.69531500 -4.78849100 -1.47300600                                                                        |
| O -0.00035500 -4.37198700 0.32484100                                                                                  | O 0.28046300 -4.44853800 0.47131300                                                                         |
| P -1.81686600 0.05224200 0.22674700                                                                                   | P -1.85969600 -0.03906200 0.33495400                                                                        |
| P 1.81683800 0.05207300 0.22679100                                                                                    | P 1.68806400 0.04990400 0.04518200                                                                          |
| C -1.77272800 -0.17101000 2.07886400                                                                                  | C -2.01639200 -0.41146100 2.15564500                                                                        |
| H -1.10344100 0.59137600 2.48497900                                                                                   | H -1.44527800 0.34688700 2.69714500                                                                         |
| H -2.75802600 -0.02751000 2.52999400                                                                                  | H -3.05005800 -0.37090100 2.50526900                                                                        |
| C -1.24905000 -1.57220000 2.39215500                                                                                  | C -1.42472700 -1.79825900 2.35931600                                                                        |
| H -1.13018000 -1.68464400 3.47901100                                                                                  | H -1.25928400 -1.99562400 3.42657000                                                                        |
| H -1.99394400 -2.30757600 2.07689500                                                                                  | H -2.12832200 -2.54996700 1.99405900                                                                        |
| C 1.24895200 -1.57284300 2.39185800                                                                                   | C 1.06784100 -1.53800800 2.26954100                                                                         |
| H 1.99350700 -2.30835000 2.07610000                                                                                   | H 1.85212800 -2.23959000 1.97477400                                                                         |
| H 1.13041900 -1.68563400 3.47872100                                                                                   | H 0.95149100 -1.62499600 3.35767900                                                                         |
| C 1.77293000 -0.17171200 2.07888400                                                                                   | C 1.50782800 -0.11951200 1.90730200                                                                         |
| H 2.75835600 -0.02854600 2.52983300                                                                                   | H 2.44659300 0.10830600 2.42062300                                                                          |
| H 1.10388800 0.59070400 2.48534300                                                                                    | H 0.76352100 0.60809000 2.23753400                                                                          |
| C -3.46194300 -0.67639800 -0.22044100                                                                                 | C -3.43202200 -0.68281600 -0.40880800                                                                       |
| C -3.47727600 -1.85080800 -0.97151500                                                                                 | C -3.40240000 -1.95709700 -0.97630200                                                                       |
| H -2.53892800 -2.28859400 -1.29809000                                                                                 | H -2.46158500 -2.50053800 -0.99767700                                                                       |
| C -4.68415000 -2.45600200 -1.30601400                                                                                 | C -4.55558200 -2.51784600 -1.51096300                                                                       |
| H -4.68308500 -3.37018300 -1.88929600                                                                                 | H -4.51825900 -3.50864400 -1.95009800                                                                       |
| C -5.88373400 -1.88915100 -0.89879800                                                                                 | C -5.74849000 -1.80694700 -1.48927600                                                                       |
| H -6.82502300 -2.35908900 -1.16207400                                                                                 | H -6.64890900 -2.24166500 -1.90922100                                                                       |
| C -5.87684800 -0.71240900 -0.15637400                                                                                 | C -5.78378600 -0.53231600 -0.93518200                                                                       |
| H -6.81258200 -0.26177300 0.15655700                                                                                  | H -6.71115200 0.03016100 -0.92483100                                                                        |
| C -4.67345400 -0.10894300 0.17950500                                                                                  | C -4.63187700 0.02940600 -0.40011400                                                                        |
| H -4.67935000 0.81799500 0.74340800                                                                                   | H -4.66724300 1.03089600 0.01348800                                                                         |
| C -2.13821500 1.85516200 -0.00383700                                                                                  | C -2.09073300 1.78657300 0.22285000                                                                         |
| C -2.06869900 2.35332300 -1.30713500                                                                                  | C -1.62161600 2.42654400 -0.92499200                                                                        |
| H -1.82117600 1.68262200 -2.12384000                                                                                  | H -1.11539000 1.84833900 -1.69100000                                                                        |
| C -2.31136600 3.69342300 -1.56811000                                                                                  | C -1.77919900 3.79573200 -1.08497800                                                                        |
|                                                                                                                       | H -1.40520800 4.27901300 -1.98030300                                                                        |

|                                                                                                                |             |             |             |                                                                                                               |             |             |             |
|----------------------------------------------------------------------------------------------------------------|-------------|-------------|-------------|---------------------------------------------------------------------------------------------------------------|-------------|-------------|-------------|
| H                                                                                                              | -2.25792200 | 4.06200500  | -2.58660400 | C                                                                                                             | -2.39703400 | 4.54680500  | -0.09237900 |
| C                                                                                                              | -2.61179700 | 4.56387900  | -0.52640600 | H                                                                                                             | -2.51372300 | 5.61798700  | -0.21376200 |
| H                                                                                                              | -2.79482400 | 5.61334800  | -0.72840400 | C                                                                                                             | -2.85768500 | 3.92236100  | 1.05935300  |
| C                                                                                                              | -2.67198600 | 4.08310500  | 0.77399300  | H                                                                                                             | -3.33695200 | 4.50375800  | 1.83956800  |
| H                                                                                                              | -2.90361200 | 4.75594000  | 1.59262900  | C                                                                                                             | -2.70824900 | 2.54921900  | 1.21543800  |
| C                                                                                                              | -2.44071100 | 2.73659000  | 1.03396000  | H                                                                                                             | -3.08103500 | 2.07797700  | 2.11797400  |
| H                                                                                                              | -2.50209000 | 2.38185800  | 2.05614900  | C                                                                                                             | 3.41466100  | -0.59485100 | -0.20656600 |
| C                                                                                                              | 3.46183800  | -0.67652800 | -0.22074400 | C                                                                                                             | 4.53359800  | -0.00572200 | 0.38739900  |
| C                                                                                                              | 4.67340600  | -0.10918800 | 0.17917600  | H                                                                                                             | 4.41623800  | 0.87557000  | 1.00974100  |
| H                                                                                                              | 4.67938800  | 0.81769900  | 0.74316300  | C                                                                                                             | 5.80221200  | -0.52402800 | 0.17080100  |
| C                                                                                                              | 5.87674300  | -0.71268900 | -0.15685600 | H                                                                                                             | 6.66381300  | -0.05563100 | 0.63468300  |
| H                                                                                                              | 6.81252300  | -0.26213600 | 0.15605500  | C                                                                                                             | 5.96975900  | -1.63728400 | -0.64718500 |
| C                                                                                                              | 5.88350500  | -1.88934800 | -0.89941000 | H                                                                                                             | 6.96188000  | -2.04090800 | -0.81810500 |
| H                                                                                                              | 6.82474400  | -2.35932800 | -1.16278700 | C                                                                                                             | 4.86467300  | -2.22573200 | -1.24578100 |
| C                                                                                                              | 4.68385600  | -2.45606700 | -1.30662400 | H                                                                                                             | 4.98997600  | -3.09192200 | -1.88649800 |
| H                                                                                                              | 4.68270000  | -3.37017100 | -1.89002900 | C                                                                                                             | 3.59180100  | -1.70669300 | -1.02877600 |
| C                                                                                                              | 3.47703900  | -1.85084500 | -0.97197500 | H                                                                                                             | 2.72410500  | -2.16557400 | -1.48935900 |
| H                                                                                                              | 2.53864300  | -2.28852000 | -1.29855900 | C                                                                                                             | 2.01082800  | 1.86367200  | -0.16695700 |
| C                                                                                                              | 2.13836600  | 1.85505800  | -0.00319500 | C                                                                                                             | 1.89815400  | 2.82104900  | 0.84141200  |
| C                                                                                                              | 2.44065300  | 2.73618800  | 1.03491700  | H                                                                                                             | 1.64529600  | 2.52853100  | 1.85324900  |
| H                                                                                                              | 2.50182900  | 2.38117700  | 2.05701700  | C                                                                                                             | 2.11680500  | 4.16850100  | 0.57105800  |
| C                                                                                                              | 2.67203200  | 4.08277100  | 0.77538200  | H                                                                                                             | 2.02429800  | 4.89627700  | 1.37019000  |
| H                                                                                                              | 2.90350900  | 4.75535800  | 1.59426500  | C                                                                                                             | 2.45744600  | 4.58098700  | -0.70862900 |
| C                                                                                                              | 2.61214800  | 4.56392400  | -0.52488800 | H                                                                                                             | 2.63235500  | 5.63071800  | -0.91662000 |
| H                                                                                                              | 2.79524400  | 5.61344600  | -0.72654700 | C                                                                                                             | 2.57223300  | 3.63560500  | -1.72365200 |
| C                                                                                                              | 2.31194600  | 3.69376700  | -1.56691000 | H                                                                                                             | 2.83926400  | 3.94563700  | -2.72833200 |
| H                                                                                                              | 2.25875600  | 4.06263500  | -2.58531400 | C                                                                                                             | 2.34139400  | 2.29565200  | -1.45637000 |
| C                                                                                                              | 2.06919500  | 2.35360000  | -1.30637000 | H                                                                                                             | 2.42626700  | 1.56737700  | -2.25744000 |
| H                                                                                                              | 1.82188100  | 1.68313700  | -2.12333400 |                                                                                                               |             |             |             |
| 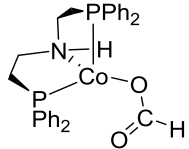 <p><b>3A1'-triplet</b></p> |             |             |             |  <p><b>3A2-triplet</b></p> |             |             |             |
| N                                                                                                              | 0.00004900  | -1.93724400 | 1.86329700  | N                                                                                                             | -0.05032000 | -1.81452900 | 1.66431500  |
| Co                                                                                                             | 0.00016000  | -1.21307600 | -0.27965000 | Co                                                                                                            | 0.00335600  | -1.04034100 | -0.32736500 |
| P                                                                                                              | -1.82613000 | -0.02500200 | 0.33023000  | P                                                                                                             | -1.89623300 | 0.09018900  | 0.17631900  |
| P                                                                                                              | 1.82623800  | -0.02490600 | 0.33043400  | P                                                                                                             | 1.86249200  | 0.12999300  | 0.25929600  |
| O                                                                                                              | 0.00013600  | -1.51657400 | -2.64163900 | O                                                                                                             | -0.15105200 | -4.17956600 | 0.20537000  |
| C                                                                                                              | -1.75640200 | -0.17221500 | 2.19126100  | C                                                                                                             | -1.76824200 | -0.01124500 | 2.03433500  |
| H                                                                                                              | -1.07915400 | 0.60057300  | 2.56164800  | H                                                                                                             | -1.07444700 | 0.77031300  | 2.35407900  |
| H                                                                                                              | -2.73430900 | -0.01013500 | 2.65198100  | H                                                                                                             | -2.73219200 | 0.16934400  | 2.51744300  |
| C                                                                                                              | -1.24815900 | -1.56590200 | 2.55375800  | C                                                                                                             | -1.24852400 | -1.39945200 | 2.41378800  |
| H                                                                                                              | -1.12663700 | -1.64285300 | 3.64380300  | H                                                                                                             | -1.05902200 | -1.43585600 | 3.49436700  |
| H                                                                                                              | -2.00654800 | -2.29766400 | 2.26409100  | H                                                                                                             | -2.02990800 | -2.13474100 | 2.20642200  |
| C                                                                                                              | 1.24842500  | -1.56628700 | 2.55366200  | C                                                                                                             | 1.24152600  | -1.59916700 | 2.33245000  |
| H                                                                                                              | 2.00663600  | -2.29811200 | 2.26369200  | H                                                                                                             | 1.93431800  | -2.34568100 | 1.93581500  |
| H                                                                                                              | 1.12705500  | -1.64349100 | 3.64370700  | H                                                                                                             | 1.15757100  | -1.78385200 | 3.41214800  |
| C                                                                                                              | 1.75682300  | -0.17258600 | 2.19143700  | C                                                                                                             | 1.81346500  | -0.20254600 | 2.09691500  |
| H                                                                                                              | 2.73483100  | -0.01076300 | 2.65202700  | H                                                                                                             | 2.80648000  | -0.12031000 | 2.54570900  |
| H                                                                                                              | 1.07975400  | 0.60019700  | 2.56216900  | H                                                                                                             | 1.17354000  | 0.55584000  | 2.55516000  |
| C                                                                                                              | -3.46516100 | -0.82026800 | -0.02542500 | C                                                                                                             | -3.47225000 | -0.81498600 | -0.16130500 |

|                                                                                                                    |                                       |
|--------------------------------------------------------------------------------------------------------------------|---------------------------------------|
| C -3.46321200 -2.13817000 -0.48396800                                                                              | C -3.39332800 -2.17843400 -0.45198200 |
| H -2.51838700 -2.64182100 -0.66662100                                                                              | H -2.42781400 -2.67340000 -0.50768300 |
| C -4.66090300 -2.80331400 -0.72183600                                                                              | C -4.54929300 -2.91864400 -0.66817100 |
| H -4.64471300 -3.82676000 -1.08039300                                                                              | H -4.47190400 -3.97728200 -0.88853800 |
| C -5.87119200 -2.15478500 -0.51630300                                                                              | C -5.79193900 -2.30134700 -0.61294700 |
| H -6.80546100 -2.67025500 -0.71038800                                                                              | H -6.69339500 -2.87704700 -0.79135100 |
| C -5.88156400 -0.83729300 -0.07131900                                                                              | C -5.87744100 -0.94186200 -0.33481700 |
| H -6.82417100 -0.32232800 0.08049700                                                                               | H -6.84554000 -0.45428000 -0.29742800 |
| C -4.68656100 -0.17434500 0.17363100                                                                               | C -4.72491200 -0.20181700 -0.10711000 |
| H -4.70578500 0.85778400 0.50639100                                                                                | H -4.80184800 0.85951900 0.10111600   |
| C -2.18437600 1.75609700 0.02551100                                                                                | C -2.32527800 1.84095800 -0.18570100  |
| C -2.05752400 2.20326400 -1.29219900                                                                               | C -2.27016700 2.25189400 -1.51967300  |
| H -1.74853000 1.50625300 -2.06480100                                                                               | H -1.97641600 1.54368600 -2.28789800  |
| C -2.31590700 3.52722600 -1.61543300                                                                               | C -2.58926800 3.55494100 -1.87142200  |
| H -2.21789000 3.85856400 -2.64333200                                                                               | H -2.54844500 3.85726300 -2.91196100  |
| C -2.68535700 4.42932900 -0.62404800                                                                               | C -2.94990000 4.47294800 -0.89155000  |
| H -2.87876400 5.46627300 -0.87552600                                                                               | H -3.19195100 5.49390500 -1.16469000  |
| C -2.80022400 3.99835000 0.69054300                                                                                | C -2.99557900 4.07817600 0.43837000   |
| H -3.08460500 4.69749500 1.46961400                                                                                | H -3.27411300 4.78972400 1.20790800   |
| C -2.55594200 2.66801200 1.01358800                                                                                | C -2.68990700 2.76821600 0.79020900   |
| H -2.66090600 2.34942500 2.04444600                                                                                | H -2.74168100 2.47725400 1.83274800   |
| C 3.46535700 -0.81976200 -0.02570400                                                                               | C 3.50929200 -0.54215000 -0.24310300  |
| C 4.68665800 -0.17344800 0.17270800                                                                                | C 4.70799000 0.08717500 0.10136900    |
| H 4.70571800 0.85877200 0.50519200                                                                                 | H 4.69419700 1.02698000 0.64286200    |
| C 5.88174700 -0.83613200 -0.07253300                                                                               | C 5.92336500 -0.47418500 -0.26201000  |
| H 6.82427300 -0.32086600 0.07876500                                                                                | H 6.84865600 0.02425500 0.00608900    |
| C 5.87156300 -2.15375000 -0.51715100                                                                               | C 5.95528000 -1.67016700 -0.97270400  |
| H 6.80590000 -2.66901700 -0.71144900                                                                               | H 6.90645200 -2.10775700 -1.25538300  |
| C 4.66137200 -2.80265800 -0.72205300                                                                               | C 4.76862300 -2.29821300 -1.32276000  |
| H 4.64532200 -3.82620000 -1.08033900                                                                               | H 4.77891100 -3.22927500 -1.87764800  |
| C 3.46358300 -2.13778100 -0.48391800                                                                               | C 3.54846900 -1.73375200 -0.96661900  |
| H 2.51882500 -2.64171500 -0.66615200                                                                               | H 2.63285100 -2.23804900 -1.25776700  |
| C 2.18396900 1.75635800 0.02610600                                                                                 | C 2.11042500 1.95115900 0.12820200    |
| C 2.55605400 2.66798600 1.01425400                                                                                 | C 2.46939900 2.76650100 1.20190100    |
| H 2.66182400 2.34903400 2.04491700                                                                                 | H 2.62042900 2.34261200 2.18788700    |
| C 2.79985000 3.99849300 0.69152500                                                                                 | C 2.64417800 4.13422900 1.02258900    |
| H 3.08463800 4.69740900 1.47065200                                                                                 | H 2.92163100 4.75554100 1.86715300    |
| C 2.68398100 4.42992200 -0.62282800                                                                                | C 2.46999500 4.70169600 -0.23211600   |
| H 2.87699700 5.46699800 -0.87406900                                                                                | H 2.60884300 5.76794400 -0.37141600   |
| C 2.31403500 3.52810300 -1.61428900                                                                                | C 2.11385900 3.89727500 -1.30844500   |
| H 2.21524700 3.85980100 -2.64199800                                                                                | H 1.97204000 4.33411600 -2.29065300   |
| C 2.05613400 2.20397500 -1.29135900                                                                                | C 1.92817000 2.53479800 -1.12742900   |
| H 1.74674000 1.50717400 -2.06398900                                                                                | H 1.63692000 1.91519000 -1.96936500   |
| H -0.00009800 -2.93990600 1.72260700                                                                               | H -0.13648100 -2.81002600 1.40614100  |
| C 0.00064100 -2.71278000 -2.32129900                                                                               | C 0.41633500 -3.81211500 -0.83208900  |
| H 0.00081300 -3.48951900 -3.10886000                                                                               | H 0.16417900 -2.64305100 -1.14087100  |
| O 0.00096900 -3.12290000 -1.11319600                                                                               | O 1.15977800 -4.32093100 -1.64724600  |
| 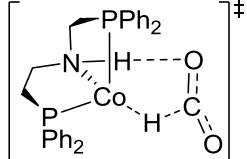                                |                                       |
| <br>CO <sub>2</sub> dissociated |                                       |



| TS3(A2/3B)-triplet |             |             |             |
|--------------------|-------------|-------------|-------------|
| N                  | -0.00004100 | -1.78407800 | 1.76390100  |
| Co                 | 0.00003600  | -1.12163400 | -0.32645900 |
| P                  | -1.81271500 | 0.12761500  | 0.23524000  |
| P                  | 1.81287200  | 0.12747400  | 0.23529400  |
| O                  | -0.00022000 | -4.50429700 | 0.45692800  |
| C                  | -1.76651600 | -0.03506400 | 2.09430300  |
| H                  | -1.09517000 | 0.73769700  | 2.47589900  |
| H                  | -2.75047100 | 0.12390600  | 2.54337700  |
| C                  | -1.25076600 | -1.42567600 | 2.45467900  |
| H                  | -1.12917700 | -1.50397300 | 3.54410000  |
| H                  | -2.00034100 | -2.16546500 | 2.16293000  |
| C                  | 1.25077500  | -1.42595500 | 2.45465800  |
| H                  | 2.00019000  | -2.16588900 | 2.16287000  |
| H                  | 1.12918100  | -1.50427100 | 3.54407800  |
| C                  | 1.76681100  | -0.03543100 | 2.09435200  |
| H                  | 2.75086400  | 0.12325100  | 2.54331000  |
| H                  | 1.09571300  | 0.73745500  | 2.47613000  |
| C                  | -3.46022300 | -0.61943300 | -0.17794900 |
| C                  | -3.47598500 | -1.81648700 | -0.89132700 |
| H                  | -2.53334900 | -2.25609100 | -1.20656200 |
| C                  | -4.68220900 | -2.43626900 | -1.20022700 |
| H                  | -4.68094700 | -3.36695900 | -1.75693600 |
| C                  | -5.88130100 | -1.86119000 | -0.80275400 |
| H                  | -6.82263800 | -2.34173000 | -1.04610700 |
| C                  | -5.87419000 | -0.66172200 | -0.09733100 |
| H                  | -6.80979800 | -0.20481500 | 0.20685000  |
| C                  | -4.67099800 | -0.04358700 | 0.21207500  |
| H                  | -4.67707900 | 0.90132100  | 0.74550100  |
| C                  | -2.14280900 | 1.92107900  | -0.04998000 |
| C                  | -2.09011300 | 2.37433300  | -1.37059400 |
| H                  | -1.85487300 | 1.67581700  | -2.16734200 |
| C                  | -2.33467400 | 3.70510000  | -1.67390300 |
| H                  | -2.29424300 | 4.03840000  | -2.70507100 |
| C                  | -2.62090200 | 4.61113800  | -0.65885500 |
| H                  | -2.80574800 | 5.65329000  | -0.89426600 |
| C                  | -2.66495500 | 4.17504500  | 0.65782500  |
| H                  | -2.88597400 | 4.87566500  | 1.45584700  |
| C                  | -2.43121500 | 2.83795100  | 0.96079100  |
| H                  | -2.48028000 | 2.51905200  | 1.99542800  |
| C                  | 3.46038500  | -0.61944100 | -0.17810900 |
| C                  | 4.67117100  | -0.04339200 | 0.21158100  |
| H                  | 4.67724800  | 0.90161400  | 0.74483400  |
| C                  | 5.87437200  | -0.66145600 | -0.09793400 |
| H                  | 6.80998700  | -0.20439000 | 0.20598500  |
| C                  | 5.88147900  | -1.86105700 | -0.80313200 |
| H                  | 6.82282200  | -2.34154200 | -1.04657100 |
| C                  | 4.68237400  | -2.43633500 | -1.20027700 |
| H                  | 4.68110800  | -3.36712400 | -1.75681900 |
| C                  | 3.47614000  | -1.81662400 | -0.89127200 |
| H                  | 2.53348900  | -2.25636900 | -1.20626700 |
| C                  | 2.14283100  | 1.92099700  | -0.04972700 |
| N                  | -0.00007900 | -1.76340800 | 1.73305100  |
| Co                 | -0.00000300 | -1.08331900 | -0.38138800 |
| P                  | -1.80056800 | 0.16551500  | 0.21892600  |
| P                  | 1.80059800  | 0.16545500  | 0.21894900  |
| O                  | -0.00007600 | -4.78557000 | 0.61237800  |
| C                  | -1.76317400 | -0.01422200 | 2.07699700  |
| H                  | -1.09307600 | 0.75424600  | 2.46919300  |
| H                  | -2.74855700 | 0.14000300  | 2.52474200  |
| C                  | -1.25070000 | -1.40801100 | 2.42654800  |
| H                  | -1.12969400 | -1.49613100 | 3.51555800  |
| H                  | -2.00251000 | -2.14245300 | 2.12708000  |
| C                  | 1.25063200  | -1.40818000 | 2.42647600  |
| H                  | 2.00234600  | -2.14267700 | 2.12690100  |
| H                  | 1.12969400  | -1.49637100 | 3.51548700  |
| C                  | 1.76322600  | -0.01441100 | 2.07700700  |
| H                  | 2.74863500  | 0.13970100  | 2.52473500  |
| H                  | 1.09320600  | 0.75408900  | 2.46927500  |
| C                  | -3.44884200 | -0.58253700 | -0.20052400 |
| C                  | -3.45896800 | -1.76477900 | -0.93834900 |
| H                  | -2.51161000 | -2.18849900 | -1.26447500 |
| C                  | -4.66292300 | -2.38511300 | -1.25584900 |
| H                  | -4.65881000 | -3.30316400 | -1.83354900 |
| C                  | -5.86454400 | -1.82684200 | -0.84185400 |
| H                  | -6.80382100 | -2.30806400 | -1.09215700 |
| C                  | -5.86248900 | -0.64239900 | -0.11140800 |
| H                  | -6.79992600 | -0.19799600 | 0.20564100  |
| C                  | -4.66180900 | -0.02298300 | 0.20577300  |
| H                  | -4.67190200 | 0.91109400  | 0.75809000  |
| C                  | -2.14589000 | 1.96063500  | -0.04448300 |
| C                  | -2.10358600 | 2.42753900  | -1.36091700 |
| H                  | -1.87049700 | 1.73758700  | -2.16573200 |
| C                  | -2.35476500 | 3.76031600  | -1.64961100 |
| H                  | -2.32198000 | 4.10375500  | -2.67777400 |
| C                  | -2.63758200 | 4.65566400  | -0.62409400 |
| H                  | -2.82749600 | 5.69944600  | -0.84810800 |
| C                  | -2.67135100 | 4.20636200  | 0.68843600  |
| H                  | -2.88954200 | 4.89833300  | 1.49481900  |
| C                  | -2.43085700 | 2.86715300  | 0.97666000  |
| H                  | -2.47197700 | 2.53833900  | 2.00855300  |
| C                  | 3.44886900  | -0.58255800 | -0.20058500 |
| C                  | 4.66184100  | -0.02303100 | 0.20573600  |
| H                  | 4.67194100  | 0.91099900  | 0.75813000  |
| C                  | 5.86251900  | -0.64241600 | -0.11151900 |
| H                  | 6.79995900  | -0.19803500 | 0.20555000  |
| C                  | 5.86456600  | -1.82679700 | -0.84206600 |
| H                  | 6.80383700  | -2.30799000 | -1.09242900 |
| C                  | 4.66294000  | -2.38503700 | -1.25608800 |
| H                  | 4.65882000  | -3.30303400 | -1.83387300 |
| C                  | 3.45898800  | -1.76473500 | -0.93851400 |
| H                  | 2.51162400  | -2.18842200 | -1.26466800 |
| C                  | 2.14590700  | 1.96059900  | -0.04433500 |
| C                  | 2.43099000  | 2.86702500  | 0.97685800  |

|                                                                                                              |             |             |             |   |             |             |             |
|--------------------------------------------------------------------------------------------------------------|-------------|-------------|-------------|---|-------------|-------------|-------------|
| C                                                                                                            | 2.43126800  | 2.83774200  | 0.96115400  | H | 2.47221600  | 2.53812000  | 2.00871700  |
| H                                                                                                            | 2.48048400  | 2.51868700  | 1.99573500  | C | 2.67146800  | 4.20625700  | 0.68872700  |
| C                                                                                                            | 2.66484600  | 4.17490600  | 0.65837200  | H | 2.88975100  | 4.89815500  | 1.49514800  |
| H                                                                                                            | 2.88589600  | 4.87542200  | 1.45647800  | C | 2.63756600  | 4.65567500  | -0.62375900 |
| C                                                                                                            | 2.62058900  | 4.61120100  | -0.65823400 | H | 2.82746800  | 5.69947500  | -0.84770100 |
| H                                                                                                            | 2.80530200  | 5.65340800  | -0.89350600 | C | 2.35463300  | 3.76042100  | -1.64932600 |
| C                                                                                                            | 2.33432500  | 3.70529300  | -1.67338900 | H | 2.32174200  | 4.10395100  | -2.67745500 |
| H                                                                                                            | 2.29372400  | 4.03875400  | -2.70449800 | C | 2.10347000  | 2.42762100  | -1.36072300 |
| C                                                                                                            | 2.08992800  | 2.37445500  | -1.37026200 | H | 1.87028800  | 1.73774200  | -2.16557400 |
| H                                                                                                            | 1.85465100  | 1.67604300  | -2.16709000 | H | -0.00015300 | -2.76384600 | 1.57544600  |
| H                                                                                                            | -0.00015200 | -2.78721100 | 1.60297700  | C | -0.00001100 | -5.01793900 | -0.52802300 |
| C                                                                                                            | -0.00024600 | -4.47218700 | -0.72305900 | H | 0.00012500  | -2.48461700 | -1.23363800 |
| H                                                                                                            | 0.00029300  | -2.59357300 | -1.09223700 | O | -0.00000700 | -5.34874000 | -1.63626200 |
| O                                                                                                            | -0.00038800 | -4.85966300 | -1.82677700 |   |             |             |             |
| 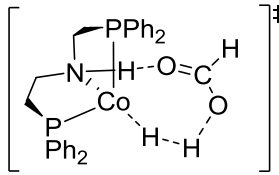 <p>TS3(3B/3A1)-triplet</p> |             |             |             |   |             |             |             |
| C                                                                                                            | -1.69028300 | 0.00859100  | 2.01733100  |   |             |             |             |
| H                                                                                                            | -0.93549600 | 0.68720300  | 2.42168800  |   |             |             |             |
| H                                                                                                            | -2.64292900 | 0.23251700  | 2.50446200  |   |             |             |             |
| C                                                                                                            | -1.30361200 | -1.44925200 | 2.26440200  |   |             |             |             |
| H                                                                                                            | -1.15391000 | -1.60991700 | 3.34057300  |   |             |             |             |
| H                                                                                                            | -2.13508500 | -2.09221200 | 1.96415400  |   |             |             |             |
| C                                                                                                            | 1.16674500  | -1.74673000 | 2.19657300  |   |             |             |             |
| H                                                                                                            | 1.82611700  | -2.52754100 | 1.80902400  |   |             |             |             |
| H                                                                                                            | 1.05153500  | -1.93549100 | 3.27292600  |   |             |             |             |
| C                                                                                                            | 1.82362400  | -0.38526000 | 1.98581700  |   |             |             |             |
| H                                                                                                            | 2.81874800  | -0.37216900 | 2.43764500  |   |             |             |             |
| H                                                                                                            | 1.23187400  | 0.40575900  | 2.45255300  |   |             |             |             |
| C                                                                                                            | -3.46019500 | -0.32336500 | -0.25038100 |   |             |             |             |
| C                                                                                                            | -3.57348700 | -1.56724400 | -0.87145000 |   |             |             |             |
| H                                                                                                            | -2.68555000 | -2.13795700 | -1.12728500 |   |             |             |             |
| C                                                                                                            | -4.82626900 | -2.09117000 | -1.17068200 |   |             |             |             |
| H                                                                                                            | -4.89756500 | -3.06035700 | -1.65122700 |   |             |             |             |
| C                                                                                                            | -5.97342500 | -1.37326000 | -0.86243500 |   |             |             |             |
| H                                                                                                            | -6.95014800 | -1.77905600 | -1.10209000 |   |             |             |             |
| C                                                                                                            | -5.86779500 | -0.12850900 | -0.25035200 |   |             |             |             |
| H                                                                                                            | -6.76147500 | 0.43893200  | -0.01410300 |   |             |             |             |
| C                                                                                                            | -4.61895600 | 0.39332800  | 0.05567900  |   |             |             |             |
| H                                                                                                            | -4.54624800 | 1.37045800  | 0.52103100  |   |             |             |             |
| C                                                                                                            | -1.95090200 | 2.11497300  | -0.01779000 |   |             |             |             |
| C                                                                                                            | -1.90217000 | 2.62838900  | -1.31616800 |   |             |             |             |
| H                                                                                                            | -1.75315900 | 1.95511700  | -2.15431800 |   |             |             |             |
| C                                                                                                            | -2.04575000 | 3.98844100  | -1.54486600 |   |             |             |             |
| H                                                                                                            | -2.01126800 | 4.37038700  | -2.55918200 |   |             |             |             |
| C                                                                                                            | -2.22414900 | 4.86050700  | -0.47671200 |   |             |             |             |
| H                                                                                                            | -2.33001300 | 5.92488000  | -0.65421200 |   |             |             |             |
| C                                                                                                            | -2.26314000 | 4.36246700  | 0.81796300  |   |             |             |             |
| H                                                                                                            | -2.40073900 | 5.03650000  | 1.65640600  |   |             |             |             |

|    |             |             |             |   |             |             |            |
|----|-------------|-------------|-------------|---|-------------|-------------|------------|
| C  | -2.13140500 | 2.99714600  | 1.04701100  |   |             |             |            |
| H  | -2.17493600 | 2.62838900  | 2.06502200  |   |             |             |            |
| C  | 3.50631600  | -0.82005700 | -0.32312900 |   |             |             |            |
| C  | 4.74130400  | -0.23687800 | -0.03196700 |   |             |             |            |
| H  | 4.78373100  | 0.73428600  | 0.44888900  |   |             |             |            |
| C  | 5.92156500  | -0.88426600 | -0.36982600 |   |             |             |            |
| H  | 6.87482700  | -0.41914200 | -0.14283800 |   |             |             |            |
| C  | 5.88311000  | -2.12242900 | -1.00217700 |   |             |             |            |
| H  | 6.80619200  | -2.62661000 | -1.26638500 |   |             |             |            |
| C  | 4.65967000  | -2.70677000 | -1.29934700 |   |             |             |            |
| H  | 4.62084200  | -3.66894300 | -1.79800500 |   |             |             |            |
| C  | 3.47664600  | -2.05615500 | -0.96717100 |   |             |             |            |
| H  | 2.52013000  | -2.50553000 | -1.21275500 |   |             |             |            |
| C  | 2.30527800  | 1.76025900  | 0.04771700  |   |             |             |            |
| C  | 2.69106400  | 2.54078000  | 1.13775900  |   |             |             |            |
| H  | 2.77020500  | 2.10298200  | 2.12603800  |   |             |             |            |
| C  | 2.98636200  | 3.88962300  | 0.97288100  |   |             |             |            |
| H  | 3.28297700  | 4.48328000  | 1.83080700  |   |             |             |            |
| C  | 2.90796900  | 4.47305800  | -0.28405000 |   |             |             |            |
| H  | 3.14085800  | 5.52425900  | -0.41212200 |   |             |             |            |
| C  | 2.52585600  | 3.70379000  | -1.37711600 |   |             |             |            |
| H  | 2.45821400  | 4.15333300  | -2.36160800 |   |             |             |            |
| C  | 2.21999600  | 2.36131600  | -1.21035900 |   |             |             |            |
| H  | 1.90968100  | 1.77015900  | -2.06602400 |   |             |             |            |
| Co | -0.04893900 | -1.04028200 | -0.47775100 |   |             |             |            |
| N  | -0.12313700 | -1.89478400 | 1.50394800  |   |             |             |            |
| H  | -0.25056500 | -2.90484600 | 1.30689700  |   |             |             |            |
| P  | -1.76933100 | 0.29351400  | 0.17845500  |   |             |             |            |
| P  | 1.89503700  | -0.03473300 | 0.15453000  |   |             |             |            |
| H  | 0.33500900  | -2.31459800 | -1.53343500 |   |             |             |            |
| H  | -0.24811300 | -3.00317900 | -1.29176800 |   |             |             |            |
| O  | -1.03158900 | -4.11452900 | -1.27300500 |   |             |             |            |
| C  | -1.00191900 | -4.85557700 | -0.23754800 |   |             |             |            |
| H  | -1.43935200 | -5.86283800 | -0.39027000 |   |             |             |            |
| O  | -0.55703000 | -4.57836100 | 0.88284600  |   |             |             |            |
|    |             |             |             |   |             |             |            |
|    |             |             |             |   |             |             |            |
| C  | -1.70124500 | -0.54452800 | 1.96018900  | C | -1.79780000 | -0.51407800 | 1.96215300 |
| H  | -0.98355100 | 0.17278100  | 2.36202500  | H | -1.12304000 | 0.23928000  | 2.37428300 |
| H  | -2.64960500 | -0.39196000 | 2.48042000  | H | -2.75510800 | -0.42058700 | 2.48056100 |
| C  | -1.23526400 | -1.97882200 | 2.18256900  | C | -1.25652000 | -1.92427500 | 2.17423900 |
| H  | -1.07240700 | -2.15854800 | 3.25135800  | H | -1.10905600 | -2.10726300 | 3.24499700 |
| H  | -2.02707100 | -2.65891900 | 1.85912900  | H | -2.00443100 | -2.64112200 | 1.82634200 |
| C  | 1.27308100  | -2.09473700 | 2.13214300  | C | 1.25705400  | -1.92461900 | 2.17381500 |
| H  | 2.00579100  | -2.79560800 | 1.72399900  | H | 2.00481700  | -2.64129800 | 1.82524000 |
| H  | 1.15862900  | -2.33101600 | 3.19645800  | H | 1.11010400  | -2.10808900 | 3.24456400 |
| C  | 1.80148100  | -0.67568000 | 1.96754100  | C | 1.79818100  | -0.51431700 | 1.96205700 |
| H  | 2.78177700  | -0.60218000 | 2.44330700  | H | 2.75554000  | -0.42087000 | 2.48037100 |

|                      |             |             |             |    |             |             |             |
|----------------------|-------------|-------------|-------------|----|-------------|-------------|-------------|
| H                    | 1.14522900  | 0.05046200  | 2.45084900  | H  | 1.12339600  | 0.23886900  | 2.37445800  |
| C                    | -3.48665000 | -1.00683500 | -0.26827800 | C  | -3.50693100 | -1.08404700 | -0.32236700 |
| C                    | -3.50683000 | -2.18084100 | -1.02077600 | C  | -3.40111000 | -2.20814500 | -1.14167100 |
| H                    | -2.57773000 | -2.59477200 | -1.40212600 | H  | -2.43089000 | -2.50683000 | -1.52929200 |
| C                    | -4.70915000 | -2.81679200 | -1.30711400 | C  | -4.53070400 | -2.94067100 | -1.48582100 |
| H                    | -4.71358100 | -3.72678900 | -1.89609800 | H  | -4.43818600 | -3.81024600 | -2.12628200 |
| C                    | -5.90220900 | -2.27678700 | -0.84740100 | C  | -5.77698400 | -2.54721600 | -1.01810000 |
| H                    | -6.84217700 | -2.76637400 | -1.07449600 | H  | -6.66107300 | -3.11221500 | -1.29002100 |
| C                    | -5.89250900 | -1.10080100 | -0.10405700 | C  | -5.89326600 | -1.42123000 | -0.20944300 |
| H                    | -6.82498200 | -0.67292100 | 0.24596500  | H  | -6.86794400 | -1.10762800 | 0.14648100  |
| C                    | -4.69256200 | -0.46815500 | 0.18554400  | C  | -4.76554800 | -0.69168500 | 0.13737600  |
| H                    | -4.69822500 | 0.45816700  | 0.74991900  | H  | -4.87092300 | 0.19567700  | 0.75215100  |
| C                    | -2.16497900 | 1.56539300  | -0.04165600 | C  | -2.38885300 | 1.59448300  | -0.00645400 |
| C                    | -2.22588400 | 2.08114900  | -1.33863800 | C  | -2.27651500 | 2.18228200  | -1.26813400 |
| H                    | -2.08263900 | 1.42541900  | -2.19142500 | H  | -1.92958100 | 1.59413600  | -2.11152300 |
| C                    | -2.47733400 | 3.42850100  | -1.54714800 | C  | -2.60729500 | 3.51651800  | -1.45174300 |
| H                    | -2.53091100 | 3.81623100  | -2.55799200 | H  | -2.52280600 | 3.96214200  | -2.43617700 |
| C                    | -2.65792600 | 4.27954600  | -0.46270500 | C  | -3.03845200 | 4.28158600  | -0.37433100 |
| H                    | -2.85195600 | 5.33337700  | -0.62551300 | H  | -3.29184400 | 5.32572200  | -0.51681600 |
| C                    | -2.59070300 | 3.77654600  | 0.82896400  | C  | -3.14214200 | 3.70728400  | 0.88542600  |
| H                    | -2.73280600 | 4.43573800  | 1.67771300  | H  | -3.47643700 | 4.30124000  | 1.72836000  |
| C                    | -2.34915400 | 2.42416800  | 1.04152200  | C  | -2.82291100 | 2.36760900  | 1.07083800  |
| H                    | -2.31299300 | 2.05260300  | 2.05866200  | H  | -2.91680700 | 1.93796100  | 2.06134500  |
| C                    | 3.51032800  | -0.97776700 | -0.35175700 | C  | 3.50701500  | -1.08385500 | -0.32269700 |
| C                    | 4.72785300  | -0.39214900 | 0.00031700  | C  | 4.76564600  | -0.69172500 | 0.13720000  |
| H                    | 4.74528200  | 0.54611100  | 0.54370700  | H  | 4.87108500  | 0.19544200  | 0.75224500  |
| C                    | 5.92354600  | -0.99384400 | -0.36464400 | C  | 5.89332400  | -1.42124700 | -0.20980400 |
| H                    | 6.86438800  | -0.52840400 | -0.09391100 | H  | 6.86801100  | -1.10782000 | 0.14624900  |
| C                    | 5.91789500  | -2.18597500 | -1.08110400 | C  | 5.77698900  | -2.54697800 | -1.01880600 |
| H                    | 6.85420300  | -2.65126000 | -1.36678200 | H  | 6.66104400  | -3.11196300 | -1.29086500 |
| C                    | 4.71241400  | -2.77309300 | -1.43998800 | C  | 4.53069500  | -2.94019600 | -1.48669100 |
| H                    | 4.70315900  | -3.69587400 | -2.00868900 | H  | 4.43813500  | -3.80956700 | -2.12742300 |
| C                    | 3.51456500  | -2.16723500 | -1.08060400 | C  | 3.40114500  | -2.20769200 | -1.14235500 |
| H                    | 2.57470400  | -2.61802000 | -1.38670200 | H  | 2.43091600  | -2.50617600 | -1.53010900 |
| C                    | 2.14422600  | 1.55512900  | 0.08877500  | C  | 2.38873100  | 1.59465200  | -0.00633800 |
| C                    | 2.56156400  | 2.30863200  | 1.18693700  | C  | 2.82387600  | 2.36735100  | 1.07083800  |
| H                    | 2.73588000  | 1.83971600  | 2.14839300  | H  | 2.91870900  | 1.93729800  | 2.06108100  |
| C                    | 2.76515300  | 3.67721700  | 1.05964000  | C  | 3.14293300  | 3.70708600  | 0.88564300  |
| H                    | 3.08864600  | 4.25421400  | 1.91847400  | H  | 3.47806500  | 4.30071900  | 1.72847300  |
| C                    | 2.56225800  | 4.30201300  | -0.16362400 | C  | 3.03798700  | 4.28188700  | -0.37379200 |
| H                    | 2.72623700  | 5.36893000  | -0.26146100 | H  | 3.29125300  | 5.32607600  | -0.51611200 |
| C                    | 2.14713200  | 3.55775000  | -1.26132900 | C  | 2.60572400  | 3.51726500  | -1.45106600 |
| H                    | 1.98494000  | 4.04221700  | -2.21721600 | H  | 2.52023100  | 3.96328300  | -2.43523400 |
| C                    | 1.93306400  | 2.19320500  | -1.13514200 | C  | 2.27510300  | 2.18295200  | -1.26765800 |
| H                    | 1.59663000  | 1.62108400  | -1.99320600 | H  | 1.92727200  | 1.59515700  | -2.11091800 |
| H                    | -0.38606200 | -1.41152100 | -2.19663800 | Co | 0.00003800  | -1.16055200 | -0.44514900 |
| Co                   | 0.00734900  | -1.41873900 | -0.52069900 | N  | 0.00011700  | -2.21669800 | 1.43056000  |
| H                    | 0.42127200  | -1.43290200 | -2.19298000 | P  | -1.97197000 | -0.18222100 | 0.13726800  |
| N                    | -0.00953000 | -2.34912100 | 1.41860800  | P  | 1.97207300  | -0.18210500 | 0.13718000  |
| P                    | -1.86420400 | -0.23346900 | 0.13263200  | H  | -0.00005100 | -3.21849100 | 1.26806400  |
| P                    | 1.89174700  | -0.25759500 | 0.15292300  |    |             |             |             |
| H                    | -0.05789200 | -3.35546000 | 1.29109400  |    |             |             |             |
| SMD-H <sub>2</sub> O |             |             |             |    |             |             |             |

|                                                                                                                                                                                                                                                                                                                                                                                                                                                                                                                                                                                                                                                                                                                                                                                                                                                                                                                                                                                                                                                                                                                                                                                                                                                                                                                                                                                                                                                                                                                                                                                                                                                                                                                                                                                                                                                                                                               |                                                                                                                                                                                                                                                                                                                                                                                                                                                                                                                                                                                                                                                                                                                                                                                                                                                                                                                                                                                                                                                                                                                                                                                                                                                                                                                                                                                                                                                                                                                                                                                                                                                                                                                                                                                                                                                                    |
|---------------------------------------------------------------------------------------------------------------------------------------------------------------------------------------------------------------------------------------------------------------------------------------------------------------------------------------------------------------------------------------------------------------------------------------------------------------------------------------------------------------------------------------------------------------------------------------------------------------------------------------------------------------------------------------------------------------------------------------------------------------------------------------------------------------------------------------------------------------------------------------------------------------------------------------------------------------------------------------------------------------------------------------------------------------------------------------------------------------------------------------------------------------------------------------------------------------------------------------------------------------------------------------------------------------------------------------------------------------------------------------------------------------------------------------------------------------------------------------------------------------------------------------------------------------------------------------------------------------------------------------------------------------------------------------------------------------------------------------------------------------------------------------------------------------------------------------------------------------------------------------------------------------|--------------------------------------------------------------------------------------------------------------------------------------------------------------------------------------------------------------------------------------------------------------------------------------------------------------------------------------------------------------------------------------------------------------------------------------------------------------------------------------------------------------------------------------------------------------------------------------------------------------------------------------------------------------------------------------------------------------------------------------------------------------------------------------------------------------------------------------------------------------------------------------------------------------------------------------------------------------------------------------------------------------------------------------------------------------------------------------------------------------------------------------------------------------------------------------------------------------------------------------------------------------------------------------------------------------------------------------------------------------------------------------------------------------------------------------------------------------------------------------------------------------------------------------------------------------------------------------------------------------------------------------------------------------------------------------------------------------------------------------------------------------------------------------------------------------------------------------------------------------------|
| CO-B3PW91-SCRF<br>C 0.00000000 0.00000000 -0.64356100<br>O 0.00000000 0.00000000 0.48267100                                                                                                                                                                                                                                                                                                                                                                                                                                                                                                                                                                                                                                                                                                                                                                                                                                                                                                                                                                                                                                                                                                                                                                                                                                                                                                                                                                                                                                                                                                                                                                                                                                                                                                                                                                                                                   |                                                                                                                                                                                                                                                                                                                                                                                                                                                                                                                                                                                                                                                                                                                                                                                                                                                                                                                                                                                                                                                                                                                                                                                                                                                                                                                                                                                                                                                                                                                                                                                                                                                                                                                                                                                                                                                                    |
| 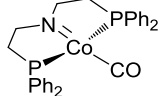 <p><b>10-singlet-SCRF</b></p>                                                                                                                                                                                                                                                                                                                                                                                                                                                                                                                                                                                                                                                                                                                                                                                                                                                                                                                                                                                                                                                                                                                                                                                                                                                                                                                                                                                                                                                                                                                                                                                                                                                                                                                                                                                               |  <p><b>10a-singlet-SCRF</b></p>                                                                                                                                                                                                                                                                                                                                                                                                                                                                                                                                                                                                                                                                                                                                                                                                                                                                                                                                                                                                                                                                                                                                                                                                                                                                                                                                                                                                                                                                                                                                                                                                                                                                                                                                                   |
| <p>C -2.42214800 -0.08271900 2.38772700<br/>H -3.35071700 0.42385400 2.65675400<br/>H -2.45637400 -1.10936200 2.75815000<br/>C -1.18378800 0.61363000 2.92498000<br/>H -1.29732000 1.70528900 2.80988500<br/>H -1.10954400 0.43472600 4.00806100<br/>C 1.20267400 0.60958800 2.93078200<br/>H 1.13778000 0.39734400 4.00881400<br/>H 1.29739800 1.70568300 2.84827100<br/>C 2.44639900 -0.04912500 2.36302300<br/>H 2.52067700 -1.08498300 2.70465300<br/>H 3.37161500 0.46256400 2.63240500<br/>C -3.36387100 -1.36507100 -0.12748200<br/>C -3.59134700 -1.35920900 -1.50713800<br/>H -3.09878100 -0.62502600 -2.13604500<br/>C -4.45058300 -2.28435300 -2.08402800<br/>H -4.61949200 -2.26570800 -3.15513000<br/>C -5.09133600 -3.23163300 -1.29169500<br/>H -5.76313600 -3.95401500 -1.74192100<br/>C -4.86744300 -3.24611600 0.07915000<br/>H -5.36478400 -3.97949000 0.70449800<br/>C -4.00652200 -2.32070100 0.66042800<br/>H -3.84928700 -2.35151100 1.73182800<br/>C -2.77756400 1.45607000 -0.07194700<br/>C -1.90365200 2.30610700 -0.74673800<br/>H -0.87454700 1.99601700 -0.90049700<br/>C -2.34557600 3.53867600 -1.21753000<br/>H -1.65856400 4.19292000 -1.74297900<br/>C -3.66339300 3.92801000 -1.01467200<br/>H -4.00937800 4.88824100 -1.38129500<br/>C -4.54136700 3.08328700 -0.34049600<br/>H -5.57096500 3.38458600 -0.18095200<br/>C -4.10230500 1.85260200 0.12846600<br/>H -4.79497700 1.19912000 0.64850900<br/>C 3.36874300 -1.42152600 -0.05723800<br/>C 4.70083200 -1.10342300 -0.32730200<br/>H 5.04857900 -0.08122100 -0.22719700<br/>C 5.58913200 -2.09385400 -0.72832800<br/>H 6.62194900 -1.83718500 -0.93726500<br/>C 5.15585900 -3.40869900 -0.86355800<br/>H 5.85003300 -4.17962700 -1.17949700<br/>C 3.83052400 -3.73159400 -0.59602700<br/>H 3.48635900 -4.75438700 -0.70348000<br/>C 2.93942800 -2.74187800 -0.19765000<br/>H 1.90346600 -2.99489800 0.00319500</p> | <p>Co-4Ph-N-2CO-c4v-singlet-B3PW91-SCRF<br/>C -2.46559800 -0.31366600 2.30251000<br/>H -3.37881100 0.21179400 2.58781300<br/>H -2.58774300 -1.37769700 2.51530900<br/>C -1.22924400 0.24126500 2.97794200<br/>H -1.21949700 1.34052500 2.83181500<br/>H -1.31273200 0.09206600 4.06715400<br/>C 1.11110800 0.40214800 2.93740400<br/>H 1.21197700 0.31191700 4.03207900<br/>H 0.97043500 1.48389700 2.74347300<br/>C 2.40135000 -0.04415200 2.28393200<br/>H 2.64192500 -1.07522300 2.55616900<br/>H 3.25588300 0.58564100 2.53867800<br/>C -3.35113000 -1.10686300 -0.41812900<br/>C -3.94938900 -0.60705400 -1.57579600<br/>H -3.72482400 0.39725300 -1.91576400<br/>C -4.84288200 -1.38829300 -2.30047300<br/>H -5.30136500 -0.98534200 -3.19695100<br/>C -5.14787900 -2.67653700 -1.87883200<br/>H -5.84754900 -3.28365100 -2.44253600<br/>C -4.54832700 -3.18485200 -0.73110800<br/>H -4.77790100 -4.19067400 -0.39669200<br/>C -3.64920000 -2.41021600 -0.00982100<br/>H -3.17982600 -2.82888800 0.87344900<br/>C -2.50857400 1.61262100 0.10846100<br/>C -1.58371300 2.40595000 -0.56625100<br/>H -0.62374200 1.98637700 -0.84792900<br/>C -1.88259900 3.72994700 -0.87240700<br/>H -1.15576600 4.33827200 -1.39915200<br/>C -3.10661700 4.27019500 -0.49979500<br/>H -3.33920200 5.30317700 -0.73426400<br/>C -4.03497800 3.48392500 0.17707300<br/>H -4.99172100 3.90240500 0.46993800<br/>C -3.74012500 2.16119600 0.47790200<br/>H -4.47408000 1.55569800 0.99880200<br/>C 3.41616400 -1.08729500 -0.25120300<br/>C 4.73489500 -0.62584700 -0.20711600<br/>H 4.95810000 0.34797500 0.21548300<br/>C 5.76886700 -1.40780100 -0.70420700<br/>H 6.78876400 -1.04139300 -0.66174900<br/>C 5.49744300 -2.65592200 -1.25714900<br/>H 6.30551800 -3.26392300 -1.64885700<br/>C 4.18894700 -3.11881100 -1.30750700<br/>H 3.97019400 -4.08896300 -1.74011100</p> |

|    |             |             |             |    |             |             |             |
|----|-------------|-------------|-------------|----|-------------|-------------|-------------|
| C  | 2.76383400  | 1.41118800  | -0.20466400 | C  | 3.15234500  | -2.33871500 | -0.80446200 |
| C  | 3.43728700  | 2.39376200  | 0.52119500  | H  | 2.13409800  | -2.70805000 | -0.84449600 |
| H  | 3.65894400  | 2.25026300  | 1.57160600  | C  | 2.44097300  | 1.60016700  | -0.18696800 |
| C  | 3.83906300  | 3.57368000  | -0.09845500 | C  | 2.76246100  | 2.68424900  | 0.62928100  |
| H  | 4.35897400  | 4.33070900  | 0.47848900  | H  | 2.81672300  | 2.56852700  | 1.70501500  |
| C  | 3.58069800  | 3.77971400  | -1.44713300 | C  | 3.02177700  | 3.93256800  | 0.07081300  |
| H  | 3.89778400  | 4.69820500  | -1.92858400 | H  | 3.27202600  | 4.76609400  | 0.71813200  |
| C  | 2.91237200  | 2.80221000  | -2.17879700 | C  | 2.96562000  | 4.11075700  | -1.30522800 |
| H  | 2.70598300  | 2.95609800  | -3.23229800 | H  | 3.17088600  | 5.08355800  | -1.73816300 |
| C  | 2.49734600  | 1.63153700  | -1.56007600 | C  | 2.64499900  | 3.03341800  | -2.12634400 |
| H  | 1.96663600  | 0.88160200  | -2.13723700 | H  | 2.59952000  | 3.16314700  | -3.20215100 |
| C  | -0.00302100 | -1.05920600 | -1.13102100 | C  | 2.37784100  | 1.78999800  | -1.57139500 |
| Co | 0.00534200  | -0.43224600 | 0.44742600  | H  | 2.12646100  | 0.95864200  | -2.22213400 |
| N  | 0.01004800  | 0.11885300  | 2.24975100  | Co | -0.01306000 | -0.86292200 | 0.47263100  |
| O  | -0.00935900 | -1.48757400 | -2.21888300 | N  | -0.01800400 | -0.38374900 | 2.47083400  |
| P  | -2.15900400 | -0.16016000 | 0.56794600  | P  | -2.08862200 | -0.13682100 | 0.50698300  |
| P  | 2.16902500  | -0.16225800 | 0.54664700  | P  | 2.05136500  | -0.07807300 | 0.47519500  |
|    |             |             |             | C  | -0.02959000 | -2.59840000 | 0.92655100  |
|    |             |             |             | C  | -0.06267200 | -0.96885600 | -1.25955100 |
|    |             |             |             | O  | -0.05253300 | -3.69194500 | 1.28519400  |
|    |             |             |             | O  | -0.12045000 | -1.04497900 | -2.41027900 |

**Table S9.** The Cartesian Coordinates (xyz) for All Optimized Structures at M06L/TZVP-SCRF(SMD,H<sub>2</sub>O) level

|                                      |                                                                                                                       |
|--------------------------------------|-----------------------------------------------------------------------------------------------------------------------|
| <b>HCOOH</b>                         | <b>CO<sub>2</sub></b>                                                                                                 |
| C 0.00000000 0.41844900 0.00000000   | C 0.00000000 -0.00012300 0.00000000                                                                                   |
| H -0.36180200 1.45419800 0.00000000  | O -1.12776200 -0.27129700 0.00000000                                                                                  |
| O 1.16407800 0.09788500 0.00000000   | O 1.12776200 0.27138900 0.00000000                                                                                    |
| O -1.03278200 -0.42644200 0.00000000 |                                                                                                                       |
| H -0.68856000 -1.33643400 0.00000000 |                                                                                                                       |
| <b>H<sub>2</sub></b>                 | <b>CO</b>                                                                                                             |
| H 0.00000000 0.00000000 0.37233000   | C 0.00000000 0.00000000 -0.64537600                                                                                   |
| H 0.00000000 0.00000000 -0.37233000  | O 0.00000000 0.00000000 0.48403200                                                                                    |
| <b>H<sup>+</sup></b>                 | <b>HCOO<sup>-</sup></b>                                                                                               |
| H 0.00000000 0.00000000 0.00000000   | C 0.00000000 0.33728700 0.00000000                                                                                    |
|                                      | H -0.00016700 1.45600400 0.00000000                                                                                   |
|                                      | O 1.12624400 -0.21746600 0.00000000                                                                                   |
|                                      | O -1.12622300 -0.21749900 0.00000000                                                                                  |
| <b>H<sub>2</sub>O</b>                | 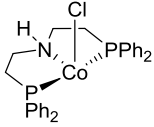 <p><b>3-triplet-M06L-SCRF</b></p> |
| O 0.00000000 0.00000000 0.11955100   | C -1.82170400 -0.57512400 2.11453700                                                                                  |
| H 0.00000000 0.75429200 -0.47820200  | H -1.21797000 0.15665000 2.65220900                                                                                   |
| H 0.00000000 -0.75429200 -0.47820200 | H -2.83816600 -0.49836100 2.50301900                                                                                  |
|                                      | C -1.27449500 -1.97177100 2.32835700                                                                                  |
|                                      | H -1.23972800 -2.20078400 3.40043300                                                                                  |
|                                      | H -1.93701000 -2.70583800 1.86196200                                                                                  |

|  |    |             |             |             |
|--|----|-------------|-------------|-------------|
|  | C  | 1.17187700  | -1.52867800 | 2.47148800  |
|  | H  | 2.04549700  | -2.16988800 | 2.33602300  |
|  | H  | 0.94511600  | -1.52181200 | 3.54364100  |
|  | C  | 1.51285800  | -0.12420600 | 2.00379400  |
|  | H  | 2.42947700  | 0.22130400  | 2.48732800  |
|  | H  | 0.72214100  | 0.58269000  | 2.26234500  |
|  | C  | -3.50256700 | -0.55516500 | -0.21581300 |
|  | C  | -3.75045200 | -1.76305200 | -0.86609600 |
|  | H  | -2.91650400 | -2.42283200 | -1.09196200 |
|  | C  | -5.04460000 | -2.11558300 | -1.22658000 |
|  | H  | -5.22658200 | -3.05712800 | -1.73062400 |
|  | C  | -6.10069000 | -1.25897200 | -0.95037300 |
|  | H  | -7.10934800 | -1.52956500 | -1.23739100 |
|  | C  | -5.86132000 | -0.05051000 | -0.30731500 |
|  | H  | -6.68366700 | 0.62084800  | -0.09129900 |
|  | C  | -4.57062500 | 0.29885800  | 0.06063500  |
|  | H  | -4.39243300 | 1.24215000  | 0.56622500  |
|  | C  | -1.72381000 | 1.65306700  | 0.22451900  |
|  | C  | -1.41428300 | 2.23761600  | -1.00693000 |
|  | H  | -1.21405200 | 1.60182100  | -1.86397500 |
|  | C  | -1.34327400 | 3.61501100  | -1.14011800 |
|  | H  | -1.09940500 | 4.05204800  | -2.10098000 |
|  | C  | -1.56641000 | 4.43207400  | -0.03808400 |
|  | H  | -1.49802700 | 5.50842400  | -0.13728700 |
|  | C  | -1.86587000 | 3.86346100  | 1.19136900  |
|  | H  | -2.04118900 | 4.49541100  | 2.05352400  |
|  | C  | -1.95043700 | 2.48263800  | 1.32268700  |
|  | H  | -2.20131800 | 2.05766000  | 2.28706800  |
|  | C  | 3.36128100  | -0.83212700 | -0.06904000 |
|  | C  | 4.52586700  | -0.13690300 | 0.25794500  |
|  | H  | 4.46139600  | 0.88048200  | 0.63001800  |
|  | C  | 5.76604900  | -0.73908200 | 0.10825200  |
|  | H  | 6.66576200  | -0.19136700 | 0.36131000  |
|  | C  | 5.85577200  | -2.04338600 | -0.36361500 |
|  | H  | 6.82555300  | -2.51119800 | -0.48025600 |
|  | C  | 4.70247000  | -2.74395400 | -0.68718200 |
|  | H  | 4.76899800  | -3.75995800 | -1.05672600 |
|  | C  | 3.46122300  | -2.13813900 | -0.54447100 |
|  | H  | 2.55171500  | -2.67665800 | -0.80236700 |
|  | C  | 1.94743000  | 1.65203600  | -0.25364700 |
|  | C  | 1.83479300  | 2.68530700  | 0.67664200  |
|  | H  | 1.61595800  | 2.46952600  | 1.71496300  |
|  | C  | 2.00600700  | 4.00732900  | 0.28411500  |
|  | H  | 1.91196700  | 4.79866600  | 1.01816400  |
|  | C  | 2.29398100  | 4.31495000  | -1.03725200 |
|  | H  | 2.42584000  | 5.34623700  | -1.34014800 |
|  | C  | 2.40834700  | 3.29221100  | -1.97176700 |
|  | H  | 2.63152100  | 3.52352100  | -3.00613300 |
|  | C  | 2.23064900  | 1.97411400  | -1.58434600 |
|  | H  | 2.31271000  | 1.18166500  | -2.32153600 |
|  | Cl | -0.38840500 | -3.46001600 | -1.57468400 |
|  | Co | -0.04066700 | -1.46509600 | -0.39799900 |
|  | N  | 0.05768800  | -2.14971200 | 1.71295400  |

|                                                                                                                      |                                                                                                                       |
|----------------------------------------------------------------------------------------------------------------------|-----------------------------------------------------------------------------------------------------------------------|
|                                                                                                                      | H 0.23345100 -3.14777400 1.69280900                                                                                   |
|                                                                                                                      | P -1.76461100 -0.18298600 0.29218400                                                                                  |
|                                                                                                                      | P 1.67374200 -0.11782900 0.15610300                                                                                   |
| 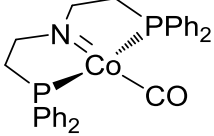 <p><b>10-singlet-M06L-SCRF</b></p> |  <p><b>10a-singlet-M06L-SCRF</b></p> |
| C -2.42778200 -0.20675200 2.37502600                                                                                 | C -2.45646500 -0.35757500 2.37116000                                                                                  |
| H -3.35397200 0.32375600 2.60067000                                                                                  | H -3.41806900 0.09303500 2.62108800                                                                                   |
| H -2.50449800 -1.22521700 2.76070200                                                                                 | H -2.47964000 -1.41470200 2.64111600                                                                                  |
| C -1.20067300 0.48122800 2.92955200                                                                                  | C -1.27857000 0.34664500 3.00015000                                                                                   |
| H -1.28029700 1.56843500 2.74930700                                                                                  | H -1.37121900 1.43326500 2.79289300                                                                                   |
| H -1.16282900 0.37064300 4.02267400                                                                                  | H -1.33021500 0.26136500 4.09667700                                                                                   |
| C 1.16404000 0.60191600 2.93011100                                                                                   | C 1.02199400 0.73439200 2.88476100                                                                                    |
| H 1.13908300 0.48217500 4.02303700                                                                                   | H 1.08520800 0.80544800 3.98270600                                                                                    |
| H 1.12150600 1.69175400 2.75744600                                                                                   | H 0.79821800 1.76718900 2.54758900                                                                                    |
| C 2.45990200 0.05366700 2.37455000                                                                                   | C 2.36091800 0.30503400 2.33265400                                                                                    |
| H 2.67653000 -0.93312600 2.78894500                                                                                  | H 2.68488500 -0.63771400 2.77790100                                                                                   |
| H 3.32159000 0.69370400 2.57001500                                                                                   | H 3.15021500 1.04161400 2.48891700                                                                                    |
| C -3.40325600 -1.35346400 -0.16967500                                                                                | C -3.30809400 -1.21258000 -0.34842300                                                                                 |
| C -3.44147600 -1.47124500 -1.56139900                                                                                | C -3.78558200 -0.77504400 -1.58428500                                                                                 |
| H -2.71442300 -0.94014200 -2.16705900                                                                                | H -3.48230700 0.19146300 -1.97044500                                                                                  |
| C -4.40469500 -2.25700600 -2.17264500                                                                                | C -4.64999100 -1.57033100 -2.32182700                                                                                 |
| H -4.42635700 -2.33907900 -3.25223300                                                                                | H -5.01755700 -1.21903800 -3.27791700                                                                                 |
| C -5.33935700 -2.93793600 -1.40215400                                                                                | C -5.04243400 -2.80996900 -1.83680700                                                                                 |
| H -6.09179500 -3.55278000 -1.87992100                                                                                | H -5.72056700 -3.42815600 -2.41157300                                                                                 |
| C -5.30713500 -2.82632900 -0.02003600                                                                                | C -4.55978600 -3.25789900 -0.61417600                                                                                 |
| H -6.03642200 -3.35136900 0.58441500                                                                                 | H -4.85872900 -4.22665200 -0.23369600                                                                                 |
| C -4.34432900 -2.03817900 0.59677800                                                                                 | C -3.68948900 -2.47002700 0.12340600                                                                                  |
| H -4.33599600 -1.95609800 1.67661700                                                                                 | H -3.30616700 -2.83711700 1.06856000                                                                                  |
| C -2.48284900 1.36413000 -0.05484400                                                                                 | C -2.45601600 1.51560400 0.16294400                                                                                   |
| C -1.45370100 2.17482100 -0.52810000                                                                                 | C -1.43075800 2.36429100 -0.24704700                                                                                  |
| H -0.44085000 1.77960100 -0.55130100                                                                                 | H -0.42188500 1.97314300 -0.34431600                                                                                  |
| C -1.72076400 3.46525000 -0.96569300                                                                                 | C -1.69276300 3.70075000 -0.51735500                                                                                  |
| H -0.91271800 4.08607700 -1.33401800                                                                                 | H -0.88780500 4.35264000 -0.83446600                                                                                  |
| C -3.01942800 3.95250700 -0.93296300                                                                                 | C -2.98137100 4.19574900 -0.38166800                                                                                  |
| H -3.23081300 4.95807800 -1.27503700                                                                                 | H -3.18752600 5.23744900 -0.59394500                                                                                  |
| C -4.05159000 3.14869500 -0.46294700                                                                                 | C -4.00929800 3.35508300 0.02898100                                                                                   |
| H -5.06573500 3.52808300 -0.43786400                                                                                 | H -5.01545600 3.74072300 0.13699800                                                                                   |
| C -3.78666200 1.86001900 -0.02556200                                                                                 | C -3.75003200 2.02139400 0.30200500                                                                                   |
| H -4.59605400 1.23585100 0.33888200                                                                                  | H -4.55561900 1.36947500 0.62193500                                                                                   |
| C 3.51891000 -1.26078300 -0.03580900                                                                                 | C 3.46485700 -1.07525800 -0.03147300                                                                                  |
| C 4.78685900 -0.72470400 -0.26290800                                                                                 | C 4.78040700 -0.73387800 0.28716100                                                                                   |
| H 4.96423000 0.33271000 -0.09814100                                                                                  | H 4.98274800 0.14935400 0.88304200                                                                                    |
| C 5.81980800 -1.53963800 -0.69943700                                                                                 | C 5.83065500 -1.52130400 -0.15739800                                                                                  |
| H 6.80191200 -1.11769100 -0.87348800                                                                                 | H 6.84867400 -1.25550000 0.09906900                                                                                   |
| C 5.59505800 -2.89360900 -0.91496700                                                                                 | C 5.57844900 -2.64620400 -0.93340600                                                                                  |
| H 6.40233100 -3.52758000 -1.26004500                                                                                 | H 6.40103000 -3.25815200 -1.28202200                                                                                  |
| C 4.33610800 -3.43280700 -0.69117700                                                                                 | C 4.27393000 -2.98397500 -1.26212600                                                                                  |
| H 4.15819700 -4.48727700 -0.86172400                                                                                 | H 4.07475700 -3.85789200 -1.86974400                                                                                  |
| C 3.29994300 -2.61926100 -0.25438800                                                                                 |                                                                                                                       |



|                                                                                                                       |             |             |             |                                                                                                                           |             |             |             |
|-----------------------------------------------------------------------------------------------------------------------|-------------|-------------|-------------|---------------------------------------------------------------------------------------------------------------------------|-------------|-------------|-------------|
| H                                                                                                                     | 2.31251100  | -3.03545700 | -0.08304500 | C                                                                                                                         | 3.21854700  | -2.20318500 | -0.80959700 |
| C                                                                                                                     | 2.40474400  | 1.39211400  | -0.24635800 | H                                                                                                                         | 2.19756600  | -2.46911400 | -1.06166100 |
| C                                                                                                                     | 2.71806600  | 2.56274300  | 0.44277800  | C                                                                                                                         | 2.36994500  | 1.54440200  | -0.33214600 |
| H                                                                                                                     | 2.91311300  | 2.53696100  | 1.50749500  | C                                                                                                                         | 2.36508700  | 2.77610700  | 0.32203800  |
| C                                                                                                                     | 2.78667200  | 3.77625900  | -0.23217500 | H                                                                                                                         | 2.27157100  | 2.82461100  | 1.39980600  |
| H                                                                                                                     | 3.02685400  | 4.67932800  | 0.31542300  | C                                                                                                                         | 2.48078000  | 3.95516900  | -0.40198100 |
| C                                                                                                                     | 2.55540300  | 3.83157000  | -1.59770700 | H                                                                                                                         | 2.47605200  | 4.90443800  | 0.11951400  |
| H                                                                                                                     | 2.60863600  | 4.77835500  | -2.12043600 | C                                                                                                                         | 2.60031800  | 3.92001000  | -1.78344000 |
| C                                                                                                                     | 2.25601500  | 2.66581300  | -2.29529500 | H                                                                                                                         | 2.68723700  | 4.84117300  | -2.34581500 |
| H                                                                                                                     | 2.07871100  | 2.70170900  | -3.36311600 | C                                                                                                                         | 2.61602400  | 2.69650100  | -2.44213300 |
| C                                                                                                                     | 2.17355700  | 1.45779500  | -1.62471700 | H                                                                                                                         | 2.71989100  | 2.66021000  | -3.51952400 |
| H                                                                                                                     | 1.91940800  | 0.55449400  | -2.17042000 | C                                                                                                                         | 2.49888500  | 1.51774300  | -1.72355200 |
| C                                                                                                                     | 0.09027500  | -1.48687900 | -0.98679800 | H                                                                                                                         | 2.51300000  | 0.56741100  | -2.24671700 |
| Co                                                                                                                    | 0.04406900  | -0.73354400 | 0.54174300  | Co                                                                                                                        | 0.01540900  | -0.82876200 | 0.49636100  |
| N                                                                                                                     | 0.01272800  | -0.06385200 | 2.32790300  | N                                                                                                                         | -0.02238600 | -0.20006400 | 2.51077200  |
| O                                                                                                                     | 0.13610200  | -1.98684100 | -2.05026900 | P                                                                                                                         | -2.08164100 | -0.23136500 | 0.57997800  |
| P                                                                                                                     | -2.09233000 | -0.32262800 | 0.57545900  | P                                                                                                                         | 2.07371300  | -0.03622000 | 0.55270500  |
| P                                                                                                                     | 2.14902300  | -0.21924700 | 0.58759000  | C                                                                                                                         | -0.01489500 | -2.63473900 | 0.66586600  |
|                                                                                                                       |             |             |             | C                                                                                                                         | -0.04609700 | -0.63981400 | -1.22160000 |
|                                                                                                                       |             |             |             | O                                                                                                                         | -0.10350100 | -3.77196200 | 0.44490900  |
|                                                                                                                       |             |             |             | O                                                                                                                         | -0.12570400 | -0.49825400 | -2.37459600 |
| 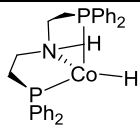 <p><b>3B-triplet-M06L-SCRF</b></p> |             |             |             |  <p><b>mer-3B-triplet-M06L-SCRF</b></p> |             |             |             |
| C                                                                                                                     | -1.83765100 | -0.95482500 | 1.95048700  | P                                                                                                                         | -2.21660700 | -0.47726300 | 0.27146200  |
| H                                                                                                                     | -1.24067800 | -0.26656700 | 2.54996200  | P                                                                                                                         | 2.11826400  | -0.45556500 | 0.29320800  |
| H                                                                                                                     | -2.85668800 | -0.91716900 | 2.33847900  | C                                                                                                                         | -2.50545600 | -0.56058700 | 2.10737300  |
| C                                                                                                                     | -1.28605200 | -2.36193700 | 2.05103600  | C                                                                                                                         | 2.37088700  | -0.43768800 | 2.13073600  |
| H                                                                                                                     | -1.23384900 | -2.67328100 | 3.10100100  | H                                                                                                                         | -2.61284300 | -1.61153000 | 2.38467300  |
| H                                                                                                                     | -1.95497500 | -3.05863200 | 1.53998800  | H                                                                                                                         | 2.51720100  | -1.47972200 | 2.42608500  |
| C                                                                                                                     | 1.16658400  | -1.95837900 | 2.21815900  | H                                                                                                                         | -3.42747400 | -0.04628300 | 2.38482900  |
| H                                                                                                                     | 2.03676200  | -2.58261900 | 2.00399500  | H                                                                                                                         | 3.27137800  | 0.10660500  | 2.42115600  |
| H                                                                                                                     | 0.94708800  | -2.07261500 | 3.28557800  | C                                                                                                                         | -1.30828600 | 0.04793000  | 2.80386700  |
| C                                                                                                                     | 1.50919600  | -0.51247700 | 1.90635700  | C                                                                                                                         | 1.13492800  | 0.12907700  | 2.79753200  |
| H                                                                                                                     | 2.42890500  | -0.22682100 | 2.42220300  | H                                                                                                                         | -1.41792100 | -0.02300800 | 3.89242500  |
| H                                                                                                                     | 0.72197900  | 0.16305900  | 2.24666800  | H                                                                                                                         | 1.23663900  | 0.09615900  | 3.88908500  |
| C                                                                                                                     | -3.46731400 | -0.82487600 | -0.41058100 | H                                                                                                                         | -1.23673700 | 1.11293500  | 2.56256800  |
| C                                                                                                                     | -3.63000900 | -1.93759200 | -1.23308700 | H                                                                                                                         | 1.00247900  | 1.18026000  | 2.52345700  |
| H                                                                                                                     | -2.74860000 | -2.49508400 | -1.54064800 | N                                                                                                                         | -0.06509100 | -0.58671700 | 2.34166700  |
| C                                                                                                                     | -4.89382100 | -2.31981200 | -1.66305300 | H                                                                                                                         | -0.02649500 | -2.78855700 | 0.18433700  |
| H                                                                                                                     | -5.00833600 | -3.18780800 | -2.30093600 | H                                                                                                                         | -0.03273900 | -1.52952000 | 2.72127700  |
| C                                                                                                                     | -6.00628600 | -1.58231600 | -1.28338700 | Co                                                                                                                        | -0.03478600 | -1.07302400 | 0.11296300  |
| H                                                                                                                     | -6.99250100 | -1.87303700 | -1.62375900 | C                                                                                                                         | -3.76207800 | -1.19084900 | -0.41633700 |
| C                                                                                                                     | -5.85332400 | -0.46698100 | -0.46803500 | C                                                                                                                         | -4.37156600 | -0.63325000 | -1.54215900 |
| H                                                                                                                     | -6.72082100 | 0.11059200  | -0.17218200 | C                                                                                                                         | -4.28632400 | -2.37311800 | 0.11252600  |
| C                                                                                                                     | -4.59177700 | -0.09189100 | -0.03078400 | C                                                                                                                         | -5.48791900 | -1.22923200 | -2.10988800 |
| H                                                                                                                     | -4.47973800 | 0.77658000  | 0.61029600  | H                                                                                                                         | -3.97399900 | 0.27767400  | -1.97521100 |
| C                                                                                                                     | -1.78936800 | 1.41349000  | 0.24779000  | C                                                                                                                         | -5.40482500 | -2.96493500 | -0.45525300 |
| C                                                                                                                     | -1.48845200 | 2.10928400  | -0.92711800 | H                                                                                                                         | -3.81994500 | -2.83811700 | 0.97347300  |

|                                                                                                                        |             |             |             |                                                                                                                        |             |             |             |
|------------------------------------------------------------------------------------------------------------------------|-------------|-------------|-------------|------------------------------------------------------------------------------------------------------------------------|-------------|-------------|-------------|
| H                                                                                                                      | -1.25943200 | 1.55364100  | -1.83156300 | C                                                                                                                      | -6.01080800 | -2.39505000 | -1.56704600 |
| C                                                                                                                      | -1.45681000 | 3.49453600  | -0.94233400 | H                                                                                                                      | -5.95171900 | -0.77910200 | -2.97917000 |
| H                                                                                                                      | -1.21719200 | 4.01840400  | -1.85990500 | H                                                                                                                      | -5.80375500 | -3.87630300 | -0.02676300 |
| C                                                                                                                      | -1.71559400 | 4.20878500  | 0.22171900  | H                                                                                                                      | -6.88414600 | -2.85828500 | -2.00877400 |
| H                                                                                                                      | -1.67893600 | 5.29123400  | 0.21458500  | C                                                                                                                      | -2.39207300 | 1.33022300  | -0.04079300 |
| C                                                                                                                      | -2.01006900 | 3.52957000  | 1.39501200  | C                                                                                                                      | -1.28457900 | 2.00305700  | -0.55560800 |
| H                                                                                                                      | -2.21357300 | 4.08090200  | 2.30506800  | C                                                                                                                      | -3.53496800 | 2.05968100  | 0.28873500  |
| C                                                                                                                      | -2.05298300 | 2.14073200  | 1.40864600  | C                                                                                                                      | -1.31245800 | 3.37876700  | -0.73988500 |
| H                                                                                                                      | -2.29813600 | 1.62840400  | 2.33108900  | H                                                                                                                      | -0.39452600 | 1.43183000  | -0.80998900 |
| C                                                                                                                      | 3.34879600  | -0.95972100 | -0.24921200 | C                                                                                                                      | -3.56506700 | 3.43394700  | 0.10278600  |
| C                                                                                                                      | 4.50531500  | -0.29172700 | 0.15424300  | H                                                                                                                      | -4.40433300 | 1.55059600  | 0.69136100  |
| H                                                                                                                      | 4.42738700  | 0.66989100  | 0.65131600  | C                                                                                                                      | -2.45455300 | 4.09495800  | -0.40989500 |
| C                                                                                                                      | 5.75366400  | -0.84887000 | -0.07931300 | H                                                                                                                      | -0.44260100 | 3.88652600  | -1.14027600 |
| H                                                                                                                      | 6.64706300  | -0.32163500 | 0.23288500  | H                                                                                                                      | -4.45596200 | 3.99348200  | 0.36095200  |
| C                                                                                                                      | 5.85986000  | -2.08230100 | -0.71157500 | H                                                                                                                      | -2.48235900 | 5.16829100  | -0.55179200 |
| H                                                                                                                      | 6.83596900  | -2.51491800 | -0.89337000 | C                                                                                                                      | 2.53220500  | 1.26113600  | -0.23783200 |
| C                                                                                                                      | 4.71493600  | -2.75659800 | -1.11180000 | C                                                                                                                      | 2.39082300  | 1.55890600  | -1.59763500 |
| H                                                                                                                      | 4.79438900  | -3.71678400 | -1.60679400 | C                                                                                                                      | 2.89605500  | 2.28746900  | 0.63342600  |
| C                                                                                                                      | 3.46579800  | -2.19416700 | -0.88499200 | C                                                                                                                      | 2.61662200  | 2.83994000  | -2.07332200 |
| H                                                                                                                      | 2.56160500  | -2.70475400 | -1.20886200 | H                                                                                                                      | 2.09407600  | 0.77447800  | -2.28717500 |
| C                                                                                                                      | 1.88642400  | 1.49810600  | -0.15604200 | C                                                                                                                      | 3.11058400  | 3.57555800  | 0.15731200  |
| C                                                                                                                      | 1.73536900  | 2.43271700  | 0.86879800  | H                                                                                                                      | 3.01974400  | 2.09293100  | 1.69180400  |
| H                                                                                                                      | 1.51629900  | 2.10965800  | 1.87897200  | C                                                                                                                      | 2.97376400  | 3.85583600  | -1.19401000 |
| C                                                                                                                      | 1.86820500  | 3.79139200  | 0.60867500  | H                                                                                                                      | 2.50686700  | 3.04899100  | -3.13053500 |
| H                                                                                                                      | 1.74477000  | 4.50408800  | 1.41543200  | H                                                                                                                      | 3.39102600  | 4.36115000  | 0.84848200  |
| C                                                                                                                      | 2.15664100  | 4.23539700  | -0.67337400 | H                                                                                                                      | 3.14085100  | 4.86051300  | -1.56182800 |
| H                                                                                                                      | 2.25860100  | 5.29489800  | -0.87292300 | C                                                                                                                      | 3.58862900  | -1.39754100 | -0.29530100 |
| C                                                                                                                      | 2.30971800  | 3.31235400  | -1.70160800 | C                                                                                                                      | 3.39991100  | -2.65561000 | -0.86210300 |
| H                                                                                                                      | 2.53331300  | 3.65011400  | -2.70623800 | C                                                                                                                      | 4.88441700  | -0.89650400 | -0.16527800 |
| C                                                                                                                      | 2.16974400  | 1.95810900  | -1.44604500 | C                                                                                                                      | 4.48788600  | -3.40512400 | -1.28950800 |
| H                                                                                                                      | 2.27881300  | 1.24404600  | -2.25646800 | H                                                                                                                      | 2.39002000  | -3.04066500 | -0.96522900 |
| Co                                                                                                                     | -0.03226000 | -1.64098300 | -0.62974500 | C                                                                                                                      | 5.97055500  | -1.64490300 | -0.59278300 |
| N                                                                                                                      | 0.04223100  | -2.49877800 | 1.40731800  | H                                                                                                                      | 5.04238200  | 0.08523700  | 0.26928900  |
| H                                                                                                                      | 0.20888200  | -3.49576100 | 1.33104800  | C                                                                                                                      | 5.77339000  | -2.90071600 | -1.15484600 |
| P                                                                                                                      | -1.75722200 | -0.42172000 | 0.16530400  | H                                                                                                                      | 4.33049700  | -4.38168700 | -1.73086400 |
| P                                                                                                                      | 1.64900000  | -0.31003600 | 0.06623900  | H                                                                                                                      | 6.97344300  | -1.24909100 | -0.48806500 |
| H                                                                                                                      | -0.06407900 | -2.09371500 | -2.25764100 | H                                                                                                                      | 6.62278500  | -3.48296300 | -1.49017800 |
| 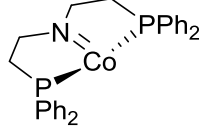 <p><b>3C-triplet-M06L-SCRF</b></p> |             |             |             |  <p><b>3C-singlet-M06L-SCRF</b></p> |             |             |             |
| C                                                                                                                      | -2.42101600 | -0.70054700 | 2.15989400  | C                                                                                                                      | -2.47024300 | -0.78231300 | 2.06721800  |
| H                                                                                                                      | -3.33544000 | -0.17700200 | 2.44598400  | H                                                                                                                      | -3.38750500 | -0.29225700 | 2.40084400  |
| H                                                                                                                      | -2.53960800 | -1.76031600 | 2.39254000  | H                                                                                                                      | -2.57239500 | -1.85300800 | 2.25703400  |
| C                                                                                                                      | -1.19783700 | -0.13403600 | 2.84188600  | C                                                                                                                      | -1.23423600 | -0.24254100 | 2.75864000  |
| H                                                                                                                      | -1.22628800 | 0.96962800  | 2.76184500  | H                                                                                                                      | -1.28518900 | 0.86749100  | 2.75886400  |
| H                                                                                                                      | -1.21681000 | -0.34542300 | 3.92054000  | H                                                                                                                      | -1.26989500 | -0.52183700 | 3.82733900  |
| C                                                                                                                      | 1.13960900  | 0.10455200  | 2.82387600  | C                                                                                                                      | 1.12605800  | -0.15416600 | 2.77362000  |
| H                                                                                                                      | 1.18587700  | -0.05950100 | 3.91037500  | H                                                                                                                      | 1.16906100  | -0.43286100 | 3.84245100  |
| H                                                                                                                      | 0.95986400  | 1.18961900  | 2.70296100  | H                                                                                                                      | 1.08910600  | 0.95546600  | 2.77655400  |
| C                                                                                                                      | 2.45646200  | -0.25254300 | 2.17456200  | C                                                                                                                      | 2.41121200  | -0.60076300 | 2.10304600  |

|    |             |             |             |    |             |             |             |
|----|-------------|-------------|-------------|----|-------------|-------------|-------------|
| H  | 2.77848100  | -1.25431800 | 2.46843000  | H  | 2.59950700  | -1.65828400 | 2.30631600  |
| H  | 3.25696500  | 0.44261700  | 2.43391000  | H  | 3.28609400  | -0.04475700 | 2.44632200  |
| C  | -3.42157300 | -1.38354700 | -0.50625900 | C  | -3.76164800 | -1.25822500 | -0.47940900 |
| C  | -3.88487900 | -0.90742300 | -1.73541800 | C  | -4.33349200 | -0.67899900 | -1.61494500 |
| H  | -3.47673600 | 0.00979100  | -2.14578900 | H  | -3.90218400 | 0.22360600  | -2.03418300 |
| C  | -4.87050500 | -1.58939200 | -2.43353500 | C  | -5.45432300 | -1.24009400 | -2.20814200 |
| H  | -5.22131700 | -1.20209200 | -3.38247000 | H  | -5.88872400 | -0.77200000 | -3.08320100 |
| C  | -5.40759100 | -2.76175700 | -1.91878000 | C  | -6.01993500 | -2.39488200 | -1.68316900 |
| H  | -6.17945600 | -3.29231700 | -2.46213700 | H  | -6.89627200 | -2.83151900 | -2.14559900 |
| C  | -4.94732400 | -3.25004200 | -0.70286500 | C  | -5.45349900 | -2.98539800 | -0.56184000 |
| H  | -5.36041800 | -4.16402900 | -0.29366200 | H  | -5.88729300 | -3.88633300 | -0.14511100 |
| C  | -3.95831900 | -2.57201600 | -0.00570400 | C  | -4.33234300 | -2.42562900 | 0.03338100  |
| H  | -3.60509200 | -2.97304100 | 0.93711300  | H  | -3.90355000 | -2.90360700 | 0.90615400  |
| C  | -2.42164800 | 1.24385500  | 0.07191500  | C  | -2.41693100 | 1.24096300  | 0.01943500  |
| C  | -1.40267700 | 2.10947500  | -0.31618300 | C  | -1.37338500 | 1.94791500  | -0.57681200 |
| H  | -0.41062000 | 1.70051900  | -0.49157000 | H  | -0.50601500 | 1.40059800  | -0.94038800 |
| C  | -1.64723600 | 3.46801500  | -0.47248900 | C  | -1.43722800 | 3.32828400  | -0.70820800 |
| H  | -0.84281200 | 4.12848600  | -0.77452800 | H  | -0.61871200 | 3.86510700  | -1.17297100 |
| C  | -2.91892300 | 3.97309100  | -0.24295200 | C  | -2.55020200 | 4.01501200  | -0.24107500 |
| H  | -3.11437900 | 5.03144800  | -0.36482100 | H  | -2.60356900 | 5.09227000  | -0.33932900 |
| C  | -3.94395300 | 3.11738600  | 0.14476700  | C  | -3.59688700 | 3.31956500  | 0.35181100  |
| H  | -4.93753800 | 3.50955900  | 0.32557200  | H  | -4.46541200 | 3.85503900  | 0.71556800  |
| C  | -3.69702600 | 1.76207300  | 0.30348900  | C  | -3.53123800 | 1.93951800  | 0.48383500  |
| H  | -4.50201100 | 1.10135700  | 0.60868100  | H  | -4.35102000 | 1.40226800  | 0.94899700  |
| C  | 3.59782900  | -1.21607200 | -0.30581200 | C  | 3.71925000  | -1.32447500 | -0.34531400 |
| C  | 4.65691600  | -0.57004600 | -0.94217300 | C  | 4.77873500  | -0.64298500 | -0.94282500 |
| H  | 4.63446100  | 0.50514200  | -1.07655700 | H  | 4.73667900  | 0.43421500  | -1.05541600 |
| C  | 5.74884700  | -1.29444100 | -1.40169000 | C  | 5.89662500  | -1.33435900 | -1.39161400 |
| H  | 6.56483800  | -0.77967700 | -1.89443800 | H  | 6.71233400  | -0.79123100 | -1.85342300 |
| C  | 5.79932900  | -2.67045200 | -1.22875500 | C  | 5.97369000  | -2.71186300 | -1.24602400 |
| H  | 6.65161400  | -3.23296600 | -1.58920400 | H  | 6.84680400  | -3.24843400 | -1.59580100 |
| C  | 4.74997800  | -3.32365100 | -0.59447000 | C  | 4.92286000  | -3.40015900 | -0.65150200 |
| H  | 4.78111500  | -4.39771000 | -0.45763300 | H  | 4.97424500  | -4.47589300 | -0.53532000 |
| C  | 3.65551900  | -2.60235000 | -0.14426300 | C  | 3.80277500  | -2.71329300 | -0.21192000 |
| H  | 2.82884300  | -3.11543100 | 0.33791800  | H  | 2.97965900  | -3.25854900 | 0.23916700  |
| C  | 2.31064800  | 1.36483000  | -0.26951500 | C  | 2.45129700  | 1.26977900  | -0.16039700 |
| C  | 2.53333200  | 2.46599000  | 0.55812500  | C  | 2.83086900  | 2.23960100  | 0.76680200  |
| H  | 2.70941500  | 2.32771400  | 1.61766900  | H  | 3.04268800  | 1.96272900  | 1.79216200  |
| C  | 2.52932800  | 3.75503100  | 0.03565300  | C  | 2.94330500  | 3.57163400  | 0.38657200  |
| H  | 2.69413000  | 4.59890000  | 0.69483100  | H  | 3.23375500  | 4.31459400  | 1.11934600  |
| C  | 2.32426600  | 3.96223500  | -1.31940400 | C  | 2.69278300  | 3.94964000  | -0.92419900 |
| H  | 2.32284500  | 4.96690600  | -1.72345400 | H  | 2.78343400  | 4.98808200  | -1.21770000 |
| C  | 2.11694600  | 2.87031300  | -2.15770100 | C  | 2.32066000  | 2.99021700  | -1.85882200 |
| H  | 1.96058100  | 3.02191100  | -3.21888200 | H  | 2.12219300  | 3.27744300  | -2.88419000 |
| C  | 2.09847700  | 1.58886500  | -1.63546200 | C  | 2.19182200  | 1.66486800  | -1.47708400 |
| H  | 1.90675900  | 0.74469000  | -2.29085200 | H  | 1.88283400  | 0.92139000  | -2.20537900 |
| Co | 0.06755300  | -1.06333000 | 0.42036900  | Co | 0.00200300  | -0.92667300 | 0.13343200  |
| N  | 0.03413400  | -0.66738100 | 2.25521300  | N  | -0.03041200 | -0.72161900 | 2.11774400  |
| P  | -2.03095100 | -0.54599200 | 0.35623100  | P  | -2.21364100 | -0.57328600 | 0.24354700  |
| P  | 2.11148400  | -0.35115900 | 0.36288500  | P  | 2.19097700  | -0.49600400 | 0.26829700  |

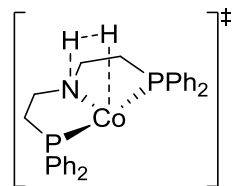

**mer-TS(3B/3A1)**-triplet-M06L-SCRF

|    |             |             |             |
|----|-------------|-------------|-------------|
| P  | -2.16204900 | -0.45417300 | 0.24846300  |
| P  | 2.21499000  | -0.53472600 | 0.21433400  |
| C  | -2.37376000 | -0.53319100 | 2.08975100  |
| C  | 2.48079300  | -0.72957800 | 2.04385200  |
| H  | -2.52498400 | -1.59266500 | 2.31316700  |
| H  | 2.55260100  | -1.80000400 | 2.24846000  |
| H  | -3.27090100 | -0.00514500 | 2.41860700  |
| H  | 3.41958800  | -0.26567000 | 2.35353000  |
| C  | -1.11869700 | -0.02513300 | 2.77646400  |
| C  | 1.28604800  | -0.13594500 | 2.76706000  |
| H  | -1.21024000 | -0.21193300 | 3.86125000  |
| H  | 1.37912300  | -0.35044400 | 3.84647300  |
| H  | -1.06857300 | 1.07752900  | 2.67848900  |
| H  | 1.33065800  | 0.96896000  | 2.69050300  |
| N  | 0.05567200  | -0.64017500 | 2.21369200  |
| H  | -0.02911400 | -2.61593600 | 0.92301300  |
| H  | 0.00048300  | -1.92309400 | 1.60708100  |
| Co | 0.00920200  | -1.00484900 | 0.05494700  |
| C  | -3.66980400 | -1.33628900 | -0.33427000 |
| C  | -4.76078000 | -0.69859400 | -0.92236100 |
| C  | -3.70121300 | -2.72525900 | -0.18264000 |
| C  | -5.86001100 | -1.43432000 | -1.34605900 |
| H  | -4.75769500 | 0.37782500  | -1.04906200 |
| C  | -4.80310300 | -3.45595300 | -0.59685300 |
| H  | -2.84999200 | -3.23432900 | 0.25949900  |
| C  | -5.88596600 | -2.81173500 | -1.18307200 |
| H  | -6.70092600 | -0.92599900 | -1.80215100 |
| H  | -4.81491000 | -4.53135600 | -0.46810700 |
| H  | -6.74458800 | -3.38278300 | -1.51361700 |
| C  | -2.48310500 | 1.29763200  | -0.20175600 |
| C  | -2.23603400 | 1.68240300  | -1.52324700 |
| C  | -2.90425300 | 2.26466700  | 0.70940900  |
| C  | -2.41967100 | 2.99516900  | -1.92619000 |
| H  | -1.89172300 | 0.94178400  | -2.23845100 |
| C  | -3.07327900 | 3.58418500  | 0.30837400  |
| H  | -3.10311100 | 1.99670200  | 1.73985900  |
| C  | -2.83538100 | 3.95188800  | -1.00780500 |
| H  | -2.22928700 | 3.27474400  | -2.95513900 |
| H  | -3.39697700 | 4.32539500  | 1.02884300  |
| H  | -2.96833000 | 4.98103300  | -1.31745200 |
| C  | 3.76889700  | -1.21181900 | -0.49658800 |
| C  | 4.37571500  | -0.60942800 | -1.60080800 |
| C  | 4.30516000  | -2.40511200 | -0.00631000 |
| C  | 5.50018000  | -1.17359600 | -2.18470500 |
| H  | 3.97009400  | 0.31256400  | -2.00249400 |

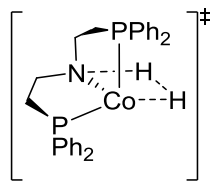

**TS(3B/3A1)**-triplet-M06L-SCRF

|    |             |             |             |
|----|-------------|-------------|-------------|
| N  | 0.11131500  | -2.54029300 | 1.38705400  |
| Co | -0.03760500 | -1.57068400 | -0.59062900 |
| P  | -1.74176300 | -0.35424100 | 0.21127900  |
| P  | 1.75460000  | -0.33890800 | -0.01302800 |
| H  | 0.48336100  | -3.26347900 | -0.86152600 |
| H  | 0.33144400  | -3.13570200 | 0.07922700  |
| C  | -1.70491000 | -0.89630300 | 1.99017100  |
| H  | -1.05181200 | -0.22883500 | 2.55322100  |
| H  | -2.70400700 | -0.82069700 | 2.42802500  |
| C  | -1.16438200 | -2.33151200 | 2.03232600  |
| H  | -1.13436600 | -2.64993200 | 3.08717300  |
| H  | -1.90294100 | -2.98259600 | 1.54576500  |
| C  | 1.27515400  | -2.05299200 | 2.10191200  |
| H  | 2.13435300  | -2.68602600 | 1.83976600  |
| H  | 1.14072000  | -2.17707300 | 3.18727200  |
| C  | 1.68880500  | -0.60241700 | 1.82843600  |
| H  | 2.64813500  | -0.36872000 | 2.29897900  |
| H  | 0.95118800  | 0.10626600  | 2.21355600  |
| C  | -3.40759600 | -0.93709600 | -0.31829700 |
| C  | -3.46879400 | -2.03167600 | -1.17878100 |
| H  | -2.54063200 | -2.47203700 | -1.53595100 |
| C  | -4.69362800 | -2.55556400 | -1.57097500 |
| H  | -4.72868800 | -3.40723200 | -2.23919900 |
| C  | -5.86993300 | -1.98179300 | -1.11087400 |
| H  | -6.82694500 | -2.38328900 | -1.42044700 |
| C  | -5.81990100 | -0.88998600 | -0.25168000 |
| H  | -6.73775800 | -0.44298100 | 0.11048000  |
| C  | -4.59664600 | -0.37295900 | 0.14633300  |
| H  | -4.56395700 | 0.47609800  | 0.82084000  |
| C  | -1.92805700 | 1.47060600  | 0.26480400  |
| C  | -2.59155400 | 2.13089700  | -0.77354500 |
| H  | -3.08165400 | 1.55441900  | -1.55073600 |
| C  | -2.63593200 | 3.51580800  | -0.81938900 |
| H  | -3.16061800 | 4.00891900  | -1.62872200 |
| C  | -2.00966300 | 4.26873400  | 0.16590600  |
| H  | -2.04288700 | 5.35054100  | 0.12955000  |
| C  | -1.33545800 | 3.62436700  | 1.19417200  |
| H  | -0.83629600 | 4.20233300  | 1.96278600  |
| C  | -1.28885900 | 2.23803200  | 1.24160800  |
| H  | -0.74560600 | 1.75582800  | 2.04630000  |
| C  | 3.49024900  | -0.86301900 | -0.39069100 |
| C  | 4.58100700  | 0.00551800  | -0.42045900 |
| H  | 4.43811500  | 1.06490200  | -0.24168400 |
| C  | 5.85776500  | -0.47481900 | -0.67941800 |
| H  | 6.69477200  | 0.21268800  | -0.70343200 |
| C  | 6.06467300  | -1.82885400 | -0.90505900 |

|                                        |                                       |
|----------------------------------------|---------------------------------------|
| C 5.43045300 -2.96651500 -0.59145800   | H 7.06188300 -2.20089200 -1.10504800  |
| H 3.84440700 -2.90262300 0.83920900    | C 4.98547800 -2.70204500 -0.88155800  |
| C 6.03304400 -2.35289900 -1.68132900   | H 5.13675300 -3.75909900 -1.06423700  |
| H 5.96265000 -0.68844200 -3.03570100   | C 3.70797100 -2.22032700 -0.63675600  |
| H 5.83793900 -3.88776400 -0.19317400   | H 2.85986600 -2.89888700 -0.64353500  |
| H 6.91215400 -2.79158100 -2.13648300   | C 1.81438800 1.49004900 -0.17870200   |
| C 2.39990100 1.28367600 0.01145000     | C 2.36098700 2.32660400 0.79650500    |
| C 3.53280300 1.97776800 0.43769500     | H 2.80757000 1.89979900 1.68741200    |
| C 1.32173900 1.99914000 -0.50666700    | C 2.33996600 3.70495400 0.63452400    |
| C 3.58294300 3.36054700 0.34187600     | H 2.76484900 4.34326400 1.39972900    |
| H 4.37865900 1.43413400 0.84521100     | C 1.77444600 4.26512000 -0.50339200   |
| C 1.36858400 3.38377000 -0.59748300    | H 1.75433500 5.34108600 -0.62614800   |
| H 0.44112400 1.45664900 -0.84263600    | C 1.22399200 3.44306800 -1.47808700   |
| C 2.50040800 4.06514600 -0.17189600    | H 0.77074600 3.87553500 -2.36192500   |
| H 4.46673600 3.89205500 0.67314300     | C 1.24005200 2.06577200 -1.31266900   |
| H 0.52143900 3.92707100 -0.99931900    | H 0.78591400 1.42453300 -2.06183700   |
| H 2.54175300 5.14519800 -0.24051400    |                                       |
| <p><b>3A1-triplet-M06L-SCRF</b></p>    | <p><b>3A2-triplet-M06L-SCRF</b></p>   |
| N 0.11871700 -1.95851500 1.98960100    | N 0.11076300 -1.95126800 1.57999100   |
| Co -0.00940900 -1.44302800 -0.16471700 | Co 0.11524000 -1.12503600 -0.45674800 |
| P -1.74457900 -0.14139300 0.43231600   | P -1.81945000 -0.12858300 0.07034000  |
| P 1.68687100 -0.04099700 0.25474700    | P 1.69775700 0.29731400 0.27116400    |
| O -0.12161400 -2.62460100 -2.81599400  | O 1.85893100 -4.57143800 -1.43836700  |
| C -1.79594400 -0.39963400 2.27545300   | C -1.73125900 -0.27417500 1.92303600  |
| H -1.20652600 0.38160800 2.75672600    | H -1.11056500 0.55291400 2.27526900   |
| H -2.81151200 -0.31669500 2.66509800   | H -2.71615300 -0.15905200 2.38009300  |
| C -1.21754600 -1.76477400 2.59065800   | C -1.13934100 -1.62284200 2.30040900  |
| H -1.17972300 -1.91396200 3.67677200   | H -0.97699400 -1.66703500 3.38367500  |
| H -1.86209700 -2.54537500 2.17817900   | H -1.86060300 -2.40691300 2.05707500  |
| C 1.21994000 -1.25349000 2.69071000    | C 1.35301800 -1.55708200 2.27173600   |
| H 2.10393600 -1.89022200 2.61657200    | H 2.15401700 -2.16926900 1.84627000   |
| H 0.98937700 -1.15283800 3.75734800    | H 1.29594200 -1.79848100 3.34005500   |
| C 1.54246300 0.10836700 2.09803600     | C 1.68620100 -0.08684100 2.09279000   |
| H 2.45740000 0.50500600 2.54424300     | H 2.65468100 0.14654500 2.53825600    |
| H 0.74521100 0.82713900 2.29965800     | H 0.94439800 0.53946900 2.58802100    |
| C -3.47119900 -0.55725500 -0.08200900  | C -3.42106100 -0.96534900 -0.29808600 |
| C -3.65537700 -1.51005700 -1.08113800  | C -3.37620800 -2.33091300 -0.58443600 |
| H -2.78685900 -1.97920600 -1.53305500  | H -2.41498800 -2.83765600 -0.61696500 |
| C -4.93447800 -1.85942700 -1.49607200  | C -4.54286100 -3.04003600 -0.83098900 |
| H -5.06603700 -2.60207400 -2.27351600  | H -4.49417000 -4.10022900 -1.04708200 |
| C -6.03991500 -1.25639700 -0.91467800  | C -5.76786000 -2.38692900 -0.81421500 |
| H -7.03799600 -1.52738800 -1.23615500  | H -6.67883500 -2.93628400 -1.01686500 |
| C -5.86608200 -0.30132700 0.08081600   | C -5.82143300 -1.02602800 -0.54369400 |
| H -6.72859800 0.17222000 0.53392600    | H -6.77494900 -0.51206700 -0.53466000 |
| C -4.58963700 0.04723100 0.49377200    | C -4.65613100 -0.31864000 -0.28356900 |
| H -4.46008800 0.79674700 1.26799800    | H -4.71104000 0.74282500 -0.06991600  |
| C -1.74041500 1.68995500 0.23934600    | C -2.14881300 1.65457400 -0.20656800  |
| C -1.46207400 2.19447100 -1.03435200   | C -1.67557000 2.22625200 -1.38876700  |

|                                     |             |             |             |                                     |             |             |             |
|-------------------------------------|-------------|-------------|-------------|-------------------------------------|-------------|-------------|-------------|
| H                                   | -1.26813600 | 1.50444100  | -1.85040300 | H                                   | -1.14801400 | 1.60547100  | -2.10606000 |
| C                                   | -1.41649300 | 3.56056700  | -1.26201200 | C                                   | -1.85458400 | 3.57801300  | -1.64167200 |
| H                                   | -1.19693100 | 3.93469100  | -2.25479400 | H                                   | -1.47897700 | 4.00933500  | -2.56156900 |
| C                                   | -1.63329400 | 4.44739300  | -0.21375400 | C                                   | -2.49875500 | 4.37861600  | -0.70748600 |
| H                                   | -1.58489900 | 5.51543400  | -0.38685700 | H                                   | -2.62915600 | 5.43682900  | -0.89785600 |
| C                                   | -1.90283100 | 3.95864000  | 1.05627400  | C                                   | -2.96525000 | 3.82253200  | 0.47634000  |
| H                                   | -2.07273100 | 4.64491600  | 1.87706700  | H                                   | -3.46343000 | 4.44554000  | 1.20907400  |
| C                                   | -1.96194500 | 2.58868200  | 1.28257600  | C                                   | -2.79353800 | 2.46803300  | 0.72673500  |
| H                                   | -2.18697600 | 2.22714500  | 2.27862400  | H                                   | -3.16297000 | 2.04519600  | 1.65378300  |
| C                                   | 3.37088700  | -0.76652900 | 0.05329800  | C                                   | 3.41492900  | -0.17608800 | -0.18306200 |
| C                                   | 4.53653800  | -0.07422200 | 0.38224200  | C                                   | 4.54805900  | 0.53422500  | 0.21442600  |
| H                                   | 4.47353300  | 0.94589900  | 0.74730600  | H                                   | 4.44008700  | 1.45824500  | 0.77227600  |
| C                                   | 5.77467400  | -0.68275900 | 0.24257600  | C                                   | 5.81287800  | 0.06084300  | -0.09988700 |
| H                                   | 6.67574400  | -0.13834400 | 0.49787900  | H                                   | 6.68884100  | 0.61889900  | 0.20766500  |
| C                                   | 5.86055600  | -1.98952900 | -0.22357100 | C                                   | 5.95972500  | -1.13092000 | -0.80094500 |
| H                                   | 6.82883300  | -2.46216500 | -0.33292000 | H                                   | 6.94998300  | -1.49850500 | -1.03994400 |
| C                                   | 4.70628400  | -2.68640400 | -0.55168200 | C                                   | 4.83853400  | -1.84829800 | -1.19262100 |
| H                                   | 4.77082900  | -3.70369500 | -0.91780900 | H                                   | 4.94620500  | -2.77941500 | -1.73591200 |
| C                                   | 3.46687800  | -2.07489700 | -0.41671300 | C                                   | 3.57240700  | -1.36690600 | -0.88988800 |
| H                                   | 2.55645200  | -2.60962500 | -0.67873700 | H                                   | 2.68700400  | -1.91856900 | -1.19635800 |
| C                                   | 1.93861400  | 1.69010000  | -0.30693200 | C                                   | 1.66993600  | 2.12636100  | 0.17326700  |
| C                                   | 1.84349400  | 2.79784300  | 0.53550300  | C                                   | 0.88793000  | 2.88212500  | 1.05019600  |
| H                                   | 1.66243500  | 2.66885600  | 1.59541600  | H                                   | 0.36494900  | 2.40274700  | 1.86986100  |
| C                                   | 1.98466500  | 4.08316400  | 0.02626900  | C                                   | 0.76102300  | 4.25319200  | 0.87904300  |
| H                                   | 1.90491100  | 4.93353400  | 0.69290300  | H                                   | 0.15228300  | 4.82394200  | 1.57003300  |
| C                                   | 2.22433400  | 4.27932200  | -1.32576400 | C                                   | 1.39998700  | 4.88967800  | -0.17638700 |
| H                                   | 2.33196500  | 5.28223800  | -1.71982000 | H                                   | 1.29597900  | 5.95913600  | -0.31085800 |
| C                                   | 2.32148600  | 3.18164200  | -2.17326400 | C                                   | 2.16953900  | 4.14564600  | -1.06118300 |
| H                                   | 2.50666900  | 3.32626400  | -3.23065000 | H                                   | 2.66990900  | 4.63308700  | -1.88898800 |
| C                                   | 2.17337900  | 1.89988700  | -1.66930800 | C                                   | 2.30043700  | 2.77572800  | -0.89130200 |
| H                                   | 2.23746400  | 1.04788400  | -2.33909300 | H                                   | 2.90053100  | 2.20476400  | -1.59130400 |
| H                                   | 0.31650000  | -2.95094600 | 2.05047800  | H                                   | 0.14668000  | -2.96173500 | 1.44949600  |
| C                                   | -0.42781300 | -3.51399100 | -1.99974500 | C                                   | 0.91925800  | -4.20126000 | -0.70229700 |
| H                                   | -0.62930900 | -4.53551100 | -2.38277500 | H                                   | 0.27591700  | -3.35914100 | -1.10335100 |
| O                                   | -0.53951900 | -3.37517600 | -0.74208100 | O                                   | 0.58917400  | -4.65328200 | 0.42098300  |
|                                     |             |             |             |                                     |             |             |             |
| <b>TS(3A2/3B)-triplet-M06L-SCRF</b> |             |             |             | <b>TS(3A2/3B)-triplet-M06L-SCRF</b> |             |             |             |
| Co                                  | -0.18638200 | -1.42705400 | 0.28306900  | N                                   | -0.06033500 | -2.04024500 | 1.62893100  |
| P                                   | -1.80579300 | 0.16718800  | 0.44403100  | Co                                  | 0.01587700  | -1.26156600 | -0.50261600 |
| P                                   | 1.87532800  | -0.39742500 | 0.52395900  | P                                   | -1.77425700 | -0.04002700 | 0.12642800  |
| N                                   | -0.26633800 | -1.40579200 | 2.48980400  | P                                   | 1.69521300  | 0.05289600  | 0.26689800  |
| C                                   | -2.02118700 | 0.33723100  | 2.26797500  | O                                   | 1.92286000  | -4.11685800 | -0.38347500 |
| H                                   | -1.38448300 | 1.16647400  | 2.58345600  | C                                   | -1.73929300 | -0.19553100 | 1.97543800  |
| H                                   | -3.04202600 | 0.60336700  | 2.54326000  | H                                   | -1.05610500 | 0.56858200  | 2.35133700  |
| C                                   | -1.60563500 | -0.96402200 | 2.93977800  | H                                   | -2.71956000 | -0.00065300 | 2.41513200  |
| H                                   | -1.63306700 | -0.84558500 | 4.02838400  | C                                   | -1.28250500 | -1.59491500 | 2.34529800  |
| H                                   | -2.30790000 | -1.75910000 | 2.68271300  | H                                   | -1.13452000 | -1.66776800 | 3.42894700  |
| C                                   | 0.81291200  | -0.59975600 | 3.10344000  | H                                   | -2.07207800 | -2.30350200 | 2.08398200  |
| H                                   | 0.96109900  | -0.89741900 | 4.14594100  | C                                   | 1.20698300  | -1.71843600 | 2.32209200  |

|   |             |             |             |   |             |             |             |
|---|-------------|-------------|-------------|---|-------------|-------------|-------------|
| H | 0.48006500  | 0.43694100  | 3.12551400  | H | 1.96126500  | -2.40522300 | 1.93052400  |
| C | 2.11593300  | -0.71042000 | 2.33990700  | H | 1.11604900  | -1.91631800 | 3.39704600  |
| H | 2.50894300  | -1.72764400 | 2.40634000  | C | 1.65646600  | -0.28953600 | 2.09542300  |
| H | 2.86584400  | -0.03970700 | 2.76195000  | H | 2.63874800  | -0.12634700 | 2.54178500  |
| H | 0.51968700  | -2.81890500 | 0.06379300  | H | 0.97165800  | 0.40960400  | 2.57340300  |
| H | -0.14169200 | -2.36524900 | 2.79526600  | C | -3.41116200 | -0.79691900 | -0.27411800 |
| C | -0.83781800 | -2.68411400 | -1.10166700 | C | -3.40829100 | -2.09092200 | -0.79376600 |
| O | -0.40834700 | -2.30298900 | -2.20129500 | H | -2.45608400 | -2.58174100 | -0.98107500 |
| C | -3.42821300 | -0.38885400 | -0.20984500 | C | -4.60132500 | -2.74284200 | -1.07366800 |
| C | -4.42310600 | -0.92264100 | 0.60679300  | H | -4.58613900 | -3.74929100 | -1.47375600 |
| C | -3.61023400 | -0.39784600 | -1.59530100 | C | -5.81033800 | -2.09921300 | -0.84984900 |
| C | -5.58328300 | -1.44312200 | 0.04804000  | H | -6.74274800 | -2.60202600 | -1.07500800 |
| H | -4.30251500 | -0.93866200 | 1.68302700  | C | -5.82313500 | -0.80666600 | -0.34013000 |
| C | -4.77178000 | -0.91120400 | -2.14812200 | H | -6.76585000 | -0.30166800 | -0.16751100 |
| H | -2.83522900 | -0.00368300 | -2.24467100 | C | -4.63082300 | -0.15918700 | -0.05048400 |
| C | -5.76119000 | -1.43877900 | -1.32722800 | H | -4.65082600 | 0.84863400  | 0.35020300  |
| H | -6.34966600 | -1.85314500 | 0.69425600  | C | -2.03417400 | 1.75219100  | -0.16307200 |
| H | -4.90280800 | -0.90632800 | -3.22312200 | C | -1.58756300 | 2.28421600  | -1.37418600 |
| H | -6.66629000 | -1.84623300 | -1.75976000 | H | -1.11332400 | 1.63169900  | -2.10054000 |
| C | -1.59789500 | 1.85140500  | -0.23454300 | C | -1.72899200 | 3.63637800  | -1.64694500 |
| C | -2.16869000 | 2.97550600  | 0.36070100  | H | -1.37403700 | 4.03647600  | -2.58891700 |
| C | -0.81929400 | 2.00274700  | -1.38282400 | C | -2.30824400 | 4.47749400  | -0.70554800 |
| C | -1.95757300 | 4.23341800  | -0.18588600 | H | -2.41002500 | 5.53561700  | -0.91294600 |
| H | -2.77743400 | 2.87126800  | 1.25143400  | C | -2.74665300 | 3.96074200  | 0.50621100  |
| C | -0.62464300 | 3.25955600  | -1.93598100 | H | -3.19326000 | 4.61479100  | 1.24517000  |
| H | -0.35753100 | 1.12970900  | -1.83480700 | C | -2.61166200 | 2.60599100  | 0.77780500  |
| C | -1.18900000 | 4.37638900  | -1.33384100 | H | -2.95551300 | 2.21654800  | 1.72889300  |
| H | -2.39706600 | 5.10424500  | 0.28460300  | C | 3.45110700  | -0.34849900 | -0.15418600 |
| H | -0.01827300 | 3.36834900  | -2.82677500 | C | 4.52289200  | 0.25565200  | 0.50657300  |
| H | -1.02624800 | 5.35995500  | -1.75694800 | H | 4.33395200  | 0.99500700  | 1.27811300  |
| C | 3.35578000  | -1.17045100 | -0.23039700 | C | 5.82784600  | -0.07757900 | 0.18005500  |
| C | 4.64101000  | -0.88234600 | 0.23263700  | H | 6.65216200  | 0.39666100  | 0.69880500  |
| C | 3.19544700  | -2.05992700 | -1.28978000 | C | 6.07902100  | -1.01810400 | -0.81303300 |
| C | 5.74460800  | -1.48369500 | -0.35165100 | H | 7.09938000  | -1.27791300 | -1.06680900 |
| H | 4.77820800  | -0.18306100 | 1.05010200  | C | 5.02153800  | -1.62073500 | -1.47753300 |
| C | 4.30330000  | -2.65563900 | -1.87867000 | H | 5.21267700  | -2.35150200 | -2.25399400 |
| H | 2.19707400  | -2.28498600 | -1.65074600 | C | 3.71360100  | -1.28514900 | -1.14941400 |
| C | 5.57664500  | -2.37033700 | -1.40876000 | H | 2.88028400  | -1.75370400 | -1.66417100 |
| H | 6.73819300  | -1.25963300 | 0.01650200  | C | 1.71823300  | 1.89092800  | 0.15952400  |
| H | 4.16987500  | -3.34390900 | -2.70404300 | C | 1.01509300  | 2.69864100  | 1.05587100  |
| H | 6.44047400  | -2.83740300 | -1.86532800 | H | 0.50702800  | 2.26189600  | 1.90784300  |
| C | 2.19051000  | 1.39660700  | 0.27651600  | C | 0.94650700  | 4.07230100  | 0.86821000  |
| C | 1.60574000  | 2.34500700  | 1.12052300  | H | 0.39889800  | 4.68117700  | 1.57783200  |
| C | 2.89557500  | 1.84392900  | -0.84280400 | C | 1.56599100  | 4.66338200  | -0.22430700 |
| C | 1.75003300  | 3.70092900  | 0.86797800  | H | 1.50696600  | 5.73464900  | -0.37145300 |
| H | 1.02537100  | 2.03118300  | 1.98048300  | C | 2.25881200  | 3.86940600  | -1.12932500 |
| C | 3.03271600  | 3.20128400  | -1.09711300 | H | 2.74437600  | 4.31940000  | -1.98679000 |
| H | 3.34438900  | 1.12699200  | -1.52085600 | C | 2.33236900  | 2.49779000  | -0.94024600 |
| C | 2.46468000  | 4.13446200  | -0.24137400 | H | 2.87695600  | 1.88916300  | -1.65459900 |
| H | 1.29506700  | 4.42109100  | 1.53733900  | H | -0.11241700 | -3.05234700 | 1.60463200  |
| H | 3.58621200  | 3.52859800  | -1.96879100 | C | 0.77249200  | -4.12718200 | -0.64951900 |
| H | 2.57084200  | 5.19346500  | -0.44120300 | H | 0.56371600  | -2.44943000 | -1.58091600 |
| O | -1.74134800 | -3.45430100 | -0.75366100 | O | -0.31424100 | -4.58460600 | -0.72477000 |

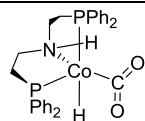

**3B-CO<sub>2</sub>-triplet-M06L-SCRF**

|    |             |             |             |
|----|-------------|-------------|-------------|
| Co | -0.20606400 | -1.52394800 | 0.30463800  |
| P  | -1.77642500 | 0.12387100  | 0.44927400  |
| P  | 1.86321900  | -0.43902600 | 0.52400200  |
| N  | -0.27869300 | -1.46329600 | 2.49852100  |
| C  | -1.97649600 | 0.32298400  | 2.27436400  |
| H  | -1.31312800 | 1.13603900  | 2.57716800  |
| H  | -2.98889500 | 0.62386200  | 2.54453000  |
| C  | -1.59816900 | -0.97946200 | 2.96099500  |
| H  | -1.60637800 | -0.84655400 | 4.04805100  |
| H  | -2.32599800 | -1.75720300 | 2.72394700  |
| C  | 0.83222200  | -0.69787800 | 3.10908300  |
| H  | 0.98836600  | -1.02161500 | 4.14228700  |
| H  | 0.52684600  | 0.34656100  | 3.15747600  |
| C  | 2.11962600  | -0.82653400 | 2.32258100  |
| H  | 2.48033000  | -1.85725600 | 2.34889000  |
| H  | 2.89603100  | -0.19356400 | 2.75440500  |
| H  | 0.60915300  | -2.86785800 | 0.21120000  |
| H  | -0.18146100 | -2.42924900 | 2.79368300  |
| C  | -1.12552600 | -2.46879200 | -1.17058200 |
| O  | -0.65180100 | -2.04338100 | -2.23143600 |
| C  | -3.44505000 | -0.28769200 | -0.19512300 |
| C  | -4.42540700 | -0.86820900 | 0.60757200  |
| C  | -3.68972000 | -0.13472900 | -1.56166300 |
| C  | -5.63199000 | -1.27622400 | 0.05485800  |
| H  | -4.25789500 | -1.00655600 | 1.66875100  |
| C  | -4.89635000 | -0.54030700 | -2.10886600 |
| H  | -2.93101000 | 0.30417100  | -2.20136200 |
| C  | -5.87027700 | -1.11518300 | -1.30203800 |
| H  | -6.38712400 | -1.72195900 | 0.69054100  |
| H  | -5.07571100 | -0.41011700 | -3.16892600 |
| H  | -6.81178000 | -1.43527500 | -1.73033800 |
| C  | -1.46362300 | 1.78883300  | -0.23671500 |
| C  | -2.01591800 | 2.93846600  | 0.32680900  |
| C  | -0.64982600 | 1.89862400  | -1.36409000 |
| C  | -1.74851300 | 4.18135900  | -0.22849700 |
| H  | -2.65485900 | 2.86500900  | 1.19948400  |
| C  | -0.39608700 | 3.14157800  | -1.92521100 |
| H  | -0.20534600 | 1.00505100  | -1.79244100 |
| C  | -0.94150100 | 4.28372900  | -1.35449200 |
| H  | -2.17344300 | 5.07207500  | 0.21746500  |
| H  | 0.23850000  | 3.21875200  | -2.79950000 |
| H  | -0.73394300 | 5.25573500  | -1.78471000 |
| C  | 3.30046000  | -1.23050900 | -0.28920500 |
| C  | 4.59745400  | -1.04970800 | 0.19386700  |
| C  | 3.09623200  | -2.01787200 | -1.41967800 |
| C  | 5.66931500  | -1.65756700 | -0.44103100 |
| H  | 4.76955500  | -0.42935700 | 1.06645600  |

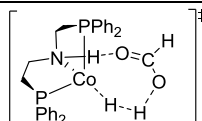

**TS(3B/3A1)-triplet-M06L-SCRF**

|   |             |             |             |
|---|-------------|-------------|-------------|
| C | -1.82435200 | -0.38285100 | 1.96121200  |
| H | -1.16822700 | 0.24261200  | 2.56769900  |
| H | -2.83573400 | -0.25611900 | 2.35000000  |
| C | -1.39189300 | -1.83242800 | 2.04828600  |
| H | -1.38708000 | -2.15923700 | 3.09592700  |
| H | -2.10482800 | -2.46731200 | 1.51469300  |
| C | 1.07665200  | -1.60006000 | 2.24222800  |
| H | 1.89363700  | -2.30259100 | 2.06111700  |
| H | 0.83579800  | -1.66278400 | 3.30972600  |
| C | 1.55045000  | -0.19708600 | 1.89890000  |
| H | 2.49168300  | 0.02078300  | 2.40897500  |
| H | 0.82639600  | 0.55758300  | 2.21359900  |
| C | -3.47042900 | 0.02444600  | -0.36320600 |
| C | -3.80603200 | -0.97010100 | -1.27816500 |
| H | -3.02181100 | -1.60917400 | -1.67232300 |
| C | -5.12346900 | -1.14140400 | -1.68425600 |
| H | -5.37193600 | -1.91982900 | -2.39547100 |
| C | -6.11637900 | -0.31188600 | -1.18402800 |
| H | -7.14351900 | -0.44026800 | -1.50256000 |
| C | -5.79029000 | 0.68779100  | -0.27466300 |
| H | -6.56352600 | 1.33818600  | 0.11613700  |
| C | -4.47616300 | 0.85423300  | 0.13454000  |
| H | -4.22963000 | 1.63574200  | 0.84603300  |
| C | -1.49889000 | 1.99133900  | 0.29127800  |
| C | -1.14926300 | 2.66005300  | -0.88589400 |
| H | -1.02536600 | 2.09409600  | -1.80428900 |
| C | -0.94472000 | 4.03046100  | -0.89104300 |
| H | -0.67154100 | 4.53155300  | -1.81197500 |
| C | -1.07217400 | 4.75657800  | 0.28736600  |
| H | -0.89935600 | 5.82576500  | 0.28838000  |
| C | -1.41056300 | 4.10400800  | 1.46375600  |
| H | -1.51149300 | 4.66409300  | 2.38552000  |
| C | -1.62808300 | 2.73119900  | 1.46676500  |
| H | -1.90566400 | 2.24317200  | 2.39318900  |
| C | 3.32916200  | -0.92497800 | -0.22684800 |
| C | 4.56132700  | -0.36773600 | 0.11532700  |
| H | 4.60338600  | 0.62957000  | 0.54097500  |
| C | 5.73297100  | -1.08177500 | -0.08725400 |
| H | 6.68614300  | -0.64020100 | 0.17724200  |
| C | 5.68561200  | -2.36148200 | -0.62721500 |
| H | 6.60209500  | -2.91645200 | -0.78520400 |
| C | 4.46384300  | -2.92610800 | -0.96532500 |
| H | 4.42324900  | -3.92289800 | -1.38706100 |
| C | 3.29181300  | -2.20763900 | -0.77140100 |
| H | 2.33067400  | -2.63880500 | -1.04259700 |
| C | 2.16701700  | 1.70041100  | -0.22088000 |
| C | 2.15901000  | 2.66677500  | 0.78496500  |



|                                                                                                                                  |                                                                                                                                               |
|----------------------------------------------------------------------------------------------------------------------------------|-----------------------------------------------------------------------------------------------------------------------------------------------|
| C 4.17244700 -2.61801400 -2.05964300                                                                                             | H 1.92842200 2.39345100 1.80728800                                                                                                            |
| H 2.08856900 -2.16105900 -1.79547500                                                                                             | C 2.45146800 3.99251800 0.48813500                                                                                                            |
| C 5.45785700 -2.44087700 -1.56921200                                                                                             | H 2.43825100 4.73246300 1.27941500                                                                                                            |
| H 6.67225200 -1.51843100 -0.05680600                                                                                             | C 2.75643500 4.36934500 -0.81142300                                                                                                           |
| H 4.00485000 -3.22581100 -2.94006400                                                                                             | H 2.98227100 5.40358600 -1.03949200                                                                                                           |
| H 6.29704200 -2.91284900 -2.06497600                                                                                             | C 2.76693200 3.41336000 -1.82050500                                                                                                           |
| C 2.23465100 1.35145100 0.33826800                                                                                               | H 3.00266700 3.69963400 -2.83818700                                                                                                           |
| C 1.65400100 2.28965200 1.19661700                                                                                               | C 2.46899000 2.09247700 -1.52849900                                                                                                           |
| C 2.98956500 1.81247500 -0.74211900                                                                                              | H 2.46966600 1.35275000 -2.32274700                                                                                                           |
| C 1.85101100 3.64749400 0.99681800                                                                                               | Co -0.09305600 -1.19039600 -0.63410600                                                                                                        |
| H 1.03374700 1.96590100 2.02466300                                                                                               | N -0.07313800 -2.05259100 1.42561600                                                                                                          |
| C 3.17911300 3.17253700 -0.94388500                                                                                              | H 0.02245800 -3.05444300 1.28439300                                                                                                           |
| H 3.43588600 1.10579000 -1.43205600                                                                                              | P -1.70691700 0.16525700 0.18332200                                                                                                           |
| C 2.61493300 4.09438700 -0.07400300                                                                                              | P 1.72475400 -0.05881800 0.05878800                                                                                                           |
| H 1.39781900 4.35915400 1.67630100                                                                                               | H -0.66378400 -2.43123300 -1.65313300                                                                                                         |
| H 3.77049800 3.51027900 -1.78616700                                                                                              | H -1.26394000 -3.23828700 -1.12187200                                                                                                         |
| H 2.76248600 5.15537400 -0.23260800                                                                                              | O -1.95456600 -4.08916900 -0.79371900                                                                                                         |
| O -2.03306300 -3.24363300 -0.86213500                                                                                            | C -1.36484900 -4.95370500 -0.02805600                                                                                                         |
|                                                                                                                                  | H -2.02237600 -5.80240800 0.22969700                                                                                                          |
|                                                                                                                                  | O -0.21479200 -4.89649400 0.39524700                                                                                                          |
| 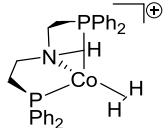 <p><b>3BH<sup>+</sup>-M06L-SCRF-Cation</b></p> |  <p><b>3B-H<sub>2</sub><sup>+</sup>-M06L-SCRF-Cation</b></p> |
| C -1.84924700 -0.92235000 1.97057700                                                                                             | C -1.86531300 -1.01468700 1.90488900                                                                                                          |
| H -1.24768800 -0.22901800 2.55905900                                                                                             | H -1.26891100 -0.32968900 2.50819900                                                                                                          |
| H -2.86403700 -0.88159000 2.36802600                                                                                             | H -2.88088000 -0.98979900 2.30205600                                                                                                          |
| C -1.30086400 -2.33119900 2.07451600                                                                                             | C -1.30339300 -2.41970300 1.98046900                                                                                                          |
| H -1.24450500 -2.63672800 3.12490600                                                                                             | H -1.24908200 -2.74482800 3.02590300                                                                                                          |
| H -1.97283900 -3.02833000 1.56902600                                                                                             | H -1.96837400 -3.11311700 1.46055000                                                                                                          |
| C 1.15912100 -1.93606700 2.22958500                                                                                              | C 1.14511100 -1.99622100 2.14810600                                                                                                           |
| H 2.02691700 -2.56068900 2.00909200                                                                                              | H 2.01966300 -2.61335800 1.93204900                                                                                                           |
| H 0.94532500 -2.04969200 3.29733900                                                                                              | H 0.92607300 -2.11520400 3.21492800                                                                                                           |
| C 1.50000000 -0.48861400 1.91897700                                                                                              | C 1.47905800 -0.54529800 1.84822300                                                                                                           |
| H 2.41195500 -0.20020700 2.44580200                                                                                              | H 2.38565200 -0.25371900 2.38337900                                                                                                           |
| H 0.70814300 0.18704800 2.24744200                                                                                               | H 0.67956300 0.12228000 2.17492500                                                                                                            |
| C -3.49091600 -0.81670500 -0.40128200                                                                                            | C -3.54511400 -0.78880600 -0.42745800                                                                                                         |
| C -3.62893100 -1.91620000 -1.24643600                                                                                            | C -3.76697700 -1.95012100 -1.16627400                                                                                                         |
| H -2.74058100 -2.45889900 -1.55804200                                                                                            | H -2.92483400 -2.58794700 -1.41850400                                                                                                         |
| C -4.88438700 -2.30893200 -1.69052700                                                                                            | C -5.04772300 -2.28934900 -1.58011500                                                                                                         |
| H -4.98238900 -3.16583300 -2.34553200                                                                                            | H -5.20856300 -3.19501500 -2.15191900                                                                                                         |
| C -6.00942800 -1.59595900 -1.30205500                                                                                            | C -6.11759700 -1.46135800 -1.27049000                                                                                                         |
| H -6.98909800 -1.89603800 -1.65272900                                                                                            | H -7.11640100 -1.71914500 -1.60013800                                                                                                         |
| C -5.87938300 -0.49408000 -0.46466600                                                                                            | C -5.90499100 -0.29874700 -0.54016600                                                                                                         |
| H -6.75759500 0.06333600 -0.16256000                                                                                             | H -6.73849500 0.34951300 -0.29845800                                                                                                          |
| C -4.62701700 -0.10652100 -0.01369600                                                                                            | C -4.62684200 0.03530500 -0.11782300                                                                                                          |
| H -4.53048700 0.75137400 0.64358000                                                                                              | H -4.46963800 0.94242500 0.45581800                                                                                                           |
| C -1.79722600 1.43713900 0.24454300                                                                                              | C -1.77658900 1.39002300 0.24679400                                                                                                           |
| C -1.45349000 2.11104800 -0.93065800                                                                                             | C -1.41614900 2.09500200 -0.90444700                                                                                                          |
| H -1.21180300 1.54071000 -1.82270000                                                                                             | H -1.17843700 1.54896200 -1.81220000                                                                                                          |
| C -1.40225000 3.49540600 -0.96108500                                                                                             | C -1.33909500 3.47854900 -0.89197500                                                                                                          |

|                                        |                                                                                     |
|----------------------------------------|-------------------------------------------------------------------------------------|
| H -1.13135000 4.00520700 -1.87769700   | H -1.05568600 4.01137200 -1.79161100                                                |
| C -1.67814100 4.22603500 0.18849600    | C -1.60628000 4.17817900 0.27870200                                                 |
| H -1.62434800 5.30757500 0.16976900    | H -1.53158000 5.25855300 0.29441100                                                 |
| C -2.01230900 3.56649700 1.36246600    | C -1.95785900 3.48826800 1.42991400                                                 |
| H -2.22808700 4.13201400 2.26068300    | H -2.16755800 4.02921100 2.34461200                                                 |
| C -2.07674200 2.17911600 1.39182500    | C -2.04928400 2.10205800 1.41483000                                                 |
| H -2.35087700 1.67951800 2.31312100    | H -2.34026100 1.58010400 2.31840000                                                 |
| C 3.34695000 -0.97882000 -0.23785200   | C 3.35630100 -1.00405400 -0.27925100                                                |
| C 4.52969100 -0.33044300 0.11699300    | C 4.52576800 -0.34243200 0.09523900                                                 |
| H 4.48997500 0.64812100 0.58389500     | H 4.46741600 0.63797700 0.55634000                                                  |
| C 5.75456400 -0.93243900 -0.12766600   | C 5.76214700 -0.93234800 -0.12036600                                                |
| H 6.67016600 -0.42269600 0.14630000    | H 6.66615300 -0.41098700 0.16992700                                                 |
| C 5.80898800 -2.18794700 -0.72169200   | C 5.84270900 -2.19022700 -0.70587400                                                |
| H 6.76746300 -2.65477000 -0.91199100   | H 6.80970000 -2.64797900 -0.87378800                                                |
| C 4.63658400 -2.84182900 -1.07348600   | C 4.68421400 -2.85819900 -1.07676100                                                |
| H 4.67703100 -3.81903800 -1.53850700   | H 4.74392700 -3.83788900 -1.53453100                                                |
| C 3.41036000 -2.23597500 -0.83675100   | C 3.44711700 -2.26391500 -0.86887000                                                |
| H 2.48444000 -2.73229400 -1.11937700   | H 2.53494600 -2.77680900 -1.16362600                                                |
| C 1.92311900 1.52286200 -0.14565000    | C 1.93921900 1.49206600 -0.16883200                                                 |
| C 1.76653600 2.45914900 0.87622900     | C 1.80307200 2.40024400 0.88103600                                                  |
| H 1.53948700 2.13938900 1.88556600     | H 1.57072600 2.05524500 1.88068000                                                  |
| C 1.90605200 3.81609000 0.61180000     | C 1.97044100 3.76171500 0.65884500                                                  |
| H 1.77935000 4.53216500 1.41479100     | H 1.85897400 4.45488200 1.48396300                                                  |
| C 2.20431000 4.25373800 -0.67006500    | C 2.27691000 4.23269300 -0.60907900                                                 |
| H 2.31116700 5.31211300 -0.87266700    | H 2.40633800 5.29431000 -0.77897300                                                 |
| C 2.36122500 3.32752100 -1.69462700    | C 2.41407600 3.33507500 -1.66165000                                                 |
| H 2.59180700 3.66141100 -2.69881400    | H 2.65202300 3.69480800 -2.65517700                                                 |
| C 2.21513400 1.97465100 -1.43626200    | C 2.24022200 1.97803500 -1.44455700                                                 |
| H 2.32864700 1.25753200 -2.24309300    | H 2.34025200 1.28397100 -2.27288500                                                 |
| H -0.05914100 -1.96442100 -2.28590600  | Co -0.05541400 -1.59099500 -0.64078300                                              |
| Co -0.03391400 -1.63403700 -0.57076300 | N 0.02490000 -2.53829700 1.33434400                                                 |
| H -0.05696000 -1.15581600 -2.22859200  | P -1.82253500 -0.44115100 0.13141000                                                |
| N 0.02751100 -2.47984000 1.42898700    | P 1.67452600 -0.31489300 0.01816000                                                 |
| P -1.80044700 -0.39425300 0.18775800   | H 0.20035200 -3.53297700 1.24447100                                                 |
| P 1.68036400 -0.27748500 0.08819600    |                                                                                     |
| H 0.19045700 -3.47856300 1.35890000    |                                                                                     |
| Gas phase                              |                                                                                     |
| <b>CO-M06L</b>                         | 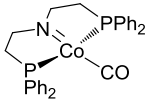 |
| C 0.00000000 0.00000000 -0.64564200    | <b>10-singlet-M06L</b>                                                              |
| O 0.00000000 0.00000000 0.48423200     | C -2.42063900 -0.21790000 2.35970200                                                |
|                                        | H -3.35929000 0.28734900 2.59601700                                                 |
|                                        | H -2.45797100 -1.24046300 2.74091500                                                |
|                                        | C -1.20832100 0.50512000 2.90816200                                                 |
|                                        | H -1.33088900 1.59249500 2.74156400                                                 |
|                                        | H -1.15046000 0.38312500 4.00095100                                                 |
|                                        | C 1.14933200 0.67441800 2.87691600                                                  |
|                                        | H 1.11912400 0.57620300 3.97368200                                                  |
|                                        | H 1.11939500 1.76459400 2.68369600                                                  |
|                                        | C 2.44234400 0.10026500 2.33475200                                                  |

|  |    |             |             |             |
|--|----|-------------|-------------|-------------|
|  | H  | 2.63620000  | -0.88335400 | 2.76666600  |
|  | H  | 3.31520000  | 0.72724400  | 2.52722000  |
|  | C  | -3.41559200 | -1.33757000 | -0.18040700 |
|  | C  | -3.42340400 | -1.52376700 | -1.56443300 |
|  | H  | -2.65498700 | -1.05985600 | -2.17301600 |
|  | C  | -4.40200100 | -2.29823300 | -2.16340400 |
|  | H  | -4.39600000 | -2.43520500 | -3.23752500 |
|  | C  | -5.38366300 | -2.90260700 | -1.38899400 |
|  | H  | -6.14682500 | -3.51132300 | -1.85762400 |
|  | C  | -5.38217900 | -2.72654400 | -0.01407900 |
|  | H  | -6.14608800 | -3.19476800 | 0.59444600  |
|  | C  | -4.40466100 | -1.94712400 | 0.58877800  |
|  | H  | -4.41886500 | -1.81321400 | 1.66357900  |
|  | C  | -2.48728000 | 1.38155400  | -0.03636000 |
|  | C  | -1.44850300 | 2.30177200  | -0.16856800 |
|  | H  | -0.43017400 | 1.97324500  | 0.02523000  |
|  | C  | -1.71413500 | 3.60771500  | -0.55230200 |
|  | H  | -0.89874200 | 4.31391500  | -0.65251500 |
|  | C  | -3.01777600 | 4.00263200  | -0.81613700 |
|  | H  | -3.22532000 | 5.01993300  | -1.12487100 |
|  | C  | -4.05725100 | 3.09111600  | -0.68895100 |
|  | H  | -5.07543200 | 3.39675300  | -0.89723100 |
|  | C  | -3.79537000 | 1.78703900  | -0.29745800 |
|  | H  | -4.61048100 | 1.07746300  | -0.20253200 |
|  | C  | 3.50619600  | -1.26621300 | -0.02901200 |
|  | C  | 4.75712000  | -0.74113800 | -0.35133600 |
|  | H  | 4.91941100  | 0.33047300  | -0.30741200 |
|  | C  | 5.78875100  | -1.58269300 | -0.73631800 |
|  | H  | 6.75753100  | -1.16819000 | -0.98698900 |
|  | C  | 5.58001800  | -2.95357300 | -0.80416700 |
|  | H  | 6.38625200  | -3.60904100 | -1.10961100 |
|  | C  | 4.33722400  | -3.48242900 | -0.48814300 |
|  | H  | 4.16941700  | -4.55050100 | -0.54904700 |
|  | C  | 3.30273400  | -2.64244200 | -0.10456800 |
|  | H  | 2.32336200  | -3.04598100 | 0.13080200  |
|  | C  | 2.42085200  | 1.38948800  | -0.30665600 |
|  | C  | 2.76812000  | 2.56402300  | 0.35947600  |
|  | H  | 2.95015700  | 2.55358300  | 1.42686600  |
|  | C  | 2.88389100  | 3.76071400  | -0.33754000 |
|  | H  | 3.14980000  | 4.66627600  | 0.19409900  |
|  | C  | 2.66802000  | 3.79549500  | -1.70555000 |
|  | H  | 2.76177500  | 4.72832900  | -2.24746400 |
|  | C  | 2.32927600  | 2.62756200  | -2.38006200 |
|  | H  | 2.15882900  | 2.64782900  | -3.44931600 |
|  | C  | 2.19626900  | 1.43849000  | -1.68624300 |
|  | H  | 1.90741300  | 0.53473500  | -2.21272900 |
|  | C  | 0.08283400  | -1.58688900 | -0.96478000 |
|  | Co | 0.03893700  | -0.73793700 | 0.53094100  |
|  | N  | 0.00543100  | 0.00143700  | 2.28603600  |
|  | O  | 0.12734800  | -2.14627700 | -1.98607300 |
|  | P  | -2.08698600 | -0.31988500 | 0.55234600  |
|  | P  | 2.12740600  | -0.20590600 | 0.54893400  |

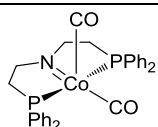

**10a-singlet-M06L**

|   |             |             |             |
|---|-------------|-------------|-------------|
| C | -2.46873200 | -0.44967000 | 2.21974100  |
| H | -3.41903100 | 0.01840400  | 2.48296900  |
| H | -2.53990900 | -1.52137500 | 2.41315300  |
| C | -1.28820600 | 0.15853300  | 2.94049900  |
| H | -1.35047800 | 1.26347400  | 2.83183100  |
| H | -1.36725600 | -0.02962100 | 4.02348200  |
| C | 1.02648700  | 0.50144400  | 2.86802400  |
| H | 1.10854500  | 0.47061600  | 3.96737600  |
| H | 0.82172900  | 1.56871600  | 2.62574300  |
| C | 2.34409700  | 0.09541900  | 2.24842200  |
| H | 2.63520800  | -0.90221400 | 2.58317700  |
| H | 3.16489000  | 0.78064400  | 2.47046200  |
| C | -3.32199900 | -1.09209200 | -0.52214700 |
| C | -3.91301500 | -0.52519700 | -1.65035500 |
| H | -3.66207800 | 0.48881700  | -1.93867300 |
| C | -4.82356900 | -1.24960300 | -2.40562600 |
| H | -5.27550300 | -0.79637400 | -3.27931700 |
| C | -5.15267200 | -2.54775700 | -2.04673700 |
| H | -5.86480100 | -3.11125200 | -2.63648000 |
| C | -4.55887800 | -3.12557700 | -0.93277400 |
| H | -4.80439600 | -4.14216100 | -0.65157900 |
| C | -3.64322800 | -2.40781300 | -0.18163200 |
| H | -3.16700900 | -2.87722800 | 0.67228600  |
| C | -2.38452900 | 1.56138000  | 0.16263900  |
| C | -1.34017000 | 2.40753700  | -0.19431500 |
| H | -0.35058400 | 1.98731700  | -0.34052500 |
| C | -1.55918000 | 3.76970800  | -0.34883400 |
| H | -0.73547000 | 4.41650500  | -0.62514700 |
| C | -2.82662400 | 4.29358100  | -0.14757300 |
| H | -3.00056600 | 5.35601100  | -0.26665500 |
| C | -3.87678500 | 3.45563900  | 0.20817600  |
| H | -4.86752500 | 3.86427100  | 0.36547500  |
| C | -3.65822400 | 2.09671000  | 0.36375800  |
| H | -4.48235800 | 1.44540200  | 0.63566000  |
| C | 3.44936100  | -0.98511400 | -0.23315200 |
| C | 4.69253500  | -0.37242900 | -0.39602000 |
| H | 4.80753400  | 0.68222600  | -0.17008700 |
| C | 5.77841700  | -1.10266300 | -0.85101700 |
| H | 6.73973600  | -0.61882700 | -0.97321700 |
| C | 5.63410200  | -2.45040100 | -1.15283200 |
| H | 6.48297800  | -3.01857100 | -1.51266100 |
| C | 4.40170100  | -3.06586800 | -0.99666200 |
| H | 4.28358100  | -4.11546600 | -1.23553700 |
| C | 3.31375200  | -2.33652800 | -0.53954100 |
| H | 2.34660200  | -2.81163900 | -0.41681000 |
| C | 2.27388700  | 1.61005300  | -0.27321000 |
| C | 2.42463200  | 2.75765300  | 0.50307700  |

|    |             |             |             |
|----|-------------|-------------|-------------|
| H  | 2.45961300  | 2.68465800  | 1.58314900  |
| C  | 2.52159000  | 4.00654200  | -0.09629000 |
| H  | 2.63871800  | 4.88863000  | 0.52152000  |
| C  | 2.47013200  | 4.12586200  | -1.47629500 |
| H  | 2.54540600  | 5.10066100  | -1.94184600 |
| C  | 2.32227200  | 2.98756100  | -2.25985900 |
| H  | 2.28293100  | 3.07185100  | -3.33883400 |
| C  | 2.22011800  | 1.74255400  | -1.66427300 |
| H  | 2.09636800  | 0.86008400  | -2.28354600 |
| Co | 0.01819600  | -0.98420500 | 0.45914400  |
| N  | -0.03886500 | -0.36857200 | 2.43122800  |
| P  | -2.03219100 | -0.22057600 | 0.44141300  |
| P  | 2.01109800  | -0.06118300 | 0.44460600  |
| C  | 0.03082400  | -1.26699300 | -1.27270300 |
| O  | 0.03463900  | -1.42175800 | -2.41760300 |
| C  | 0.01186400  | -2.68184900 | 1.12721000  |
| O  | -0.03832700 | -3.71416200 | 1.63393800  |

## 9. References

- [1] K. Junge, B. Wendt, A. Cingolani, A. Spannenberg, Z. Wei, H. Jiao, M. Beller, *Chem. Eur. J.* **2018**, *24*, 1046.
- [2] S. S. Rozenel, R. Padilla, J. Arnold, *Inorg. Chem.* **2013**, *52*, 11544.
- [3] S. Elangovan, C. Topf, S. Fischer, H. Jiao, A. Spannenberg, W. Baumann, R. Ludwig, K. Junge, M. Beller, *J. Am. Chem. Soc.* **2016**, *138*, 8809.
- [4] T. J. Korstanje, J. Ivar van der Vlugt, C. J. Elsevier, B. de Bruin, *Science* **2015**, *350*, 298-302.
- [5] M. J. Frisch, G. W. Trucks, H. B. Schlegel, G. E. Scuseria, M. A. Robb, J. R. Cheeseman, G. Scalmani, V. Barone, G. A. Petersson, H. Nakatsuji, X. Li, M. Caricato, A. Marenich, J. Bloino, B. G. Janesko, R. Gomperts, B. Mennucci, H. P. Hratchian, J. V. Ortiz, A. F. Izmaylov, J. L. Sonnenberg, D. Williams-Young, F. L. F. Ding, J. G. F. Egidi, A. P. B. Peng, T. Henderson, D. Ranasinghe, V. G. Zakrzewski, N. R. J. Gao, W. L. G. Zheng, M. E. M. Hada, K. Toyota, R. Fukuda, J. Hasegawa, M. Ishida, T. Nakajima, Y. Honda, O. Kitao, H. Nakai, T. Vreven, K. Throssell, J. A. M. Jr., J. E. Peralta, F. Ogliaro, M. Bearpark, J. J. Heyd, E. Brothers, K. N. Kudin, V. N. Staroverov, T. Keith, R. Kobayashi, J. Normand, K. Raghavachari, A. Rendell, J. C. Burant, S. S. Iyengar, J. Tomasi, M. Cossi, J. M. Millam, M. Klene, C. Adamo, R. Cammi, J. W. Ochterski, R. L. Martin, K. Morokuma, O. Farkas, J. B. Foresman, D. J. Fox, *Gaussian Inc.: Wallingford, CT, USA* **2009**.
- [6] A. D. Becke, *J. Chem. Phys.* **1993**, *98*, 5648-5652.
- [7] A. Schäfer, C. Huber, R. Ahlrichs, *J. Chem. Phys.* **1994**, *100*, 5829-5835.
- [8] Y. Zhao, D. G. Truhlar, *Theor. Chem. Acc.* **2008**, *120*, 215-241.
- [9] Y. Zhao, D. G. Truhlar, *J. Chem. Phys.* **2006**, *125*, 194101.
- [10] A. V. Marenich, C. J. Cramer, D. G. Truhlar, *J. Phys. Chem. B* **2009**, *113*, 6378-6396.
- [11] C. Hou, Y. Li, C. Zhao, Z. Ke, *Catal. Sci. Technol.* **2018**.
- [12] S. S. Rozenel, R. Padilla, C. Camp, J. Arnold, *Chem. Commun.* **2014**, *50*, 2612-2614.
- [13] P. O. Lagaditis, B. Schluschaß, S. Demeshko, C. Würtele, S. Schneider, *Inorg. Chem.* **2016**, *55*, 4529-4536.
